# Supplementary material for: Leveraging Dual-Ligase Recruitment to Enhance Protein Degradation via a Heterotrivalent Proteolysis Targeting Chimera
Source: PubMed Central journal article supplement (PMC11638965; doi:10.1021/jacs.4c11556), 2024-11-28

Supplementary information for:

***Leveraging dual-ligase recruitment to enhance protein degradation via a heterotrivalent proteolysis targeting chimera***

Authors: Adam G. Bond,<sup>‡,1</sup> Miquel Muñoz i Ordoño,<sup>‡,2</sup> Celia M. Bisbach,<sup>‡,3</sup> Conner Craigon,<sup>1</sup> Nikolai Makukhin,<sup>1</sup> Elizabeth A. Caine,<sup>3</sup> Manjula Nagala,<sup>1</sup> Marjeta Urh,<sup>3</sup> Georg E. Winter,<sup>\*,2</sup> Kristin M. Riching,<sup>\*,3</sup> Alessio Ciulli<sup>\*,1</sup>

Authors affiliations:

<sup>1</sup> Centre for Targeted Protein Degradation, School of Life Sciences, University of Dundee, 1 James Lindsay Place, DD1 5JJ, Dundee, United Kingdom

<sup>2</sup> CeMM Research Center for Molecular Medicine of the Austrian Academy of Sciences, 1090 Vienna, Austria

<sup>3</sup> Promega Corporation, 2800 Woods Hollow Road, Madison, WI U.S.A 53711.

\*Co-corresponding authors. E-mails: [GWinter@cemm.oeaw.ac.at](mailto:GWinter@cemm.oeaw.ac.at) ; [kristin.riching@promega.com](mailto:kristin.riching@promega.com) ; [a.ciulli@dundee.ac.uk](mailto:a.ciulli@dundee.ac.uk)

<sup>‡</sup> A.G.B., M.M.O. and C.M.B. contributed equally as co-first author

<sup>#</sup> Present addresses:

A.G.B and N.M.: Kesmalea Therapeutics LTD, ARC West London, Manbre Wharf, Manbre Road, London, W6 9RH, UK. C.M.B.: Waisman Center, 1500 Highland Ave, Madison, WI 53705, USA

## **Table of Contents**

|                                                                                                                                                                                                                                                       |            |
|-------------------------------------------------------------------------------------------------------------------------------------------------------------------------------------------------------------------------------------------------------|------------|
| <b>Supplementary Figure 1.</b> Raw kinetic traces of first generation heterotrivalent PROTACs in HiBiT-BET in HEK293 cells.....                                                                                                                       | <b>S5</b>  |
| <b>Supplementary Table 1.</b> Quantification of EC <sub>50</sub> values from cellular proliferation assays with dBET6, MZ1 and heterotrivalent PROTACs <b>1</b> and <b>2</b> in WT, CRBN KO, VHL KO and CRBN/VHL dKO RKO cell lines.....              | <b>S5</b>  |
| <b>Supplementary Figure 2.</b> Raw kinetic traces of second generation heterotrivalent PROTACs in HiBiT-BET in HEK293 cells.....                                                                                                                      | <b>S6</b>  |
| <b>Supplementary Table 2.</b> Quantification of live-cell degradation parameter D <sub>max 50</sub> with heterotrivalent PROTACs <b>1</b> , <b>2</b> and <b>23 – 32</b> against BET proteins in HiBiT-BRD knock-in HEK293 cells.....                  | <b>S7</b>  |
| <b>Supplementary Table 3.</b> Quantification of live-cell degradation parameter degradation rate ( $\lambda_{max}$ ) with heterotrivalent PROTACs <b>1</b> , <b>2</b> and <b>23 – 32</b> against BET proteins in HiBiT-BRD knock-in HEK293 cells..... | <b>S7</b>  |
| <b>Supplementary Figure 3.</b> Cell viability evaluation of heterotrivalent PROTACs <b>23 – 32</b> in RKO, KBM7 & K562 cell lines.....                                                                                                                | <b>S8</b>  |
| <b>Supplementary Table 4.</b> Quantification of EC <sub>50</sub> values from cellular proliferation assays with dBET6, MZ1 and heterotrivalent PROTACs <b>2</b> and <b>23 – 32</b> in WT RKO, KBM7 and K562 cell lines.....                           | <b>S9</b>  |
| <b>Supplementary Table 5.</b> Quantification of EC <sub>50</sub> values from cellular proliferation assays with heterotrivalent PROTACs <b>26</b> , <b>27</b> and <b>86</b> in WT, CRBN KO, VHL KO and CRBN/VHL dKO RKO cell lines.....               | <b>S9</b>  |
| <b>Supplementary Figure 4.</b> Kinetic traces associated with heterotetavalent PROTAC <b>86</b> .....                                                                                                                                                 | <b>S10</b> |
| <b>Supplementary Figure 5.</b> Degradation potency and rate of control compounds in HiBiT-BRD4 parental, VHL KO, and CRBN KO cells.....                                                                                                               | <b>S10</b> |
| <b>Supplementary Figure 6.</b> NanoBRET lytic and live cell target engagement assay of <b>27</b> and <b>94</b> .....                                                                                                                                  | <b>S11</b> |

|                                                                                                                                                                                                                                                 |            |
|-------------------------------------------------------------------------------------------------------------------------------------------------------------------------------------------------------------------------------------------------|------------|
| <b>Supplementary Table 6.</b> Quantification of EC <sub>50</sub> values from cellular proliferation assays with dBET6, MZ1 and heterotrivalent PROTACs <b>27</b> and <b>93 – 95</b> in WT, CRBN KO, VHL KO and CRBN/VHL dKO RKO cell lines..... | <b>S11</b> |
| <b>Supplementary Figure 7.</b> Cell viability assay with dBET6, MZ1, <b>27</b> and a 1:1 combination of dBET6 and MZ1 in BET sensitive RKO WT cells.....                                                                                        | <b>S12</b> |
| <b>Supplementary Table 7.</b> Quantification of EC <sub>50</sub> values from cellular proliferation assays with dBET6, MZ1, <b>27</b> and 1:1 combination of dBET6 and MZ1 in BET sensitive RKO WT cells.....                                   | <b>S12</b> |
| <b>Supplementary Figure 8.</b> Uncropped Western Blotting images of the evaluation of heterotrivalent PROTACs <b>23 – 32 &amp; 86</b> in HEK293 cells.....                                                                                      | <b>S13</b> |
| <b>Supplementary Figure 9.</b> Uncropped independent replicate western blotting images of the evaluation of heterotrivalent PROTACs <b>23 – 32 &amp; 86</b> in HEK293 cells.....                                                                | <b>S28</b> |
| <b>Supplementary Figure 10.</b> Uncropped independent replicate western blotting images of the evaluation of heterotrivalent <b>97</b> in homozygous BromoTag-BRD4 HEK293 cells.....                                                            | <b>S51</b> |
| <b>Supplementary Figure 11.</b> Cropped western blotting images of the evaluation of heterotrivalent AB3145 ( <b>97</b> ) and AGB1 in homozygous BromoTag-BRD4 HEK293 cells.....                                                                | <b>S59</b> |
| <b>Supplementary Table 8.</b> DC <sub>50</sub> values of AB3145 ( <b>97</b> ) and AGB1 in homozygous BromoTag-BRD4 HEK293 cells.....                                                                                                            | <b>S58</b> |
| <b>HPLC &amp; HRMS Traces for Compounds 1, 2, 23 – 32, 86, 93 – 95 and 97.....</b>                                                                                                                                                              | <b>S60</b> |

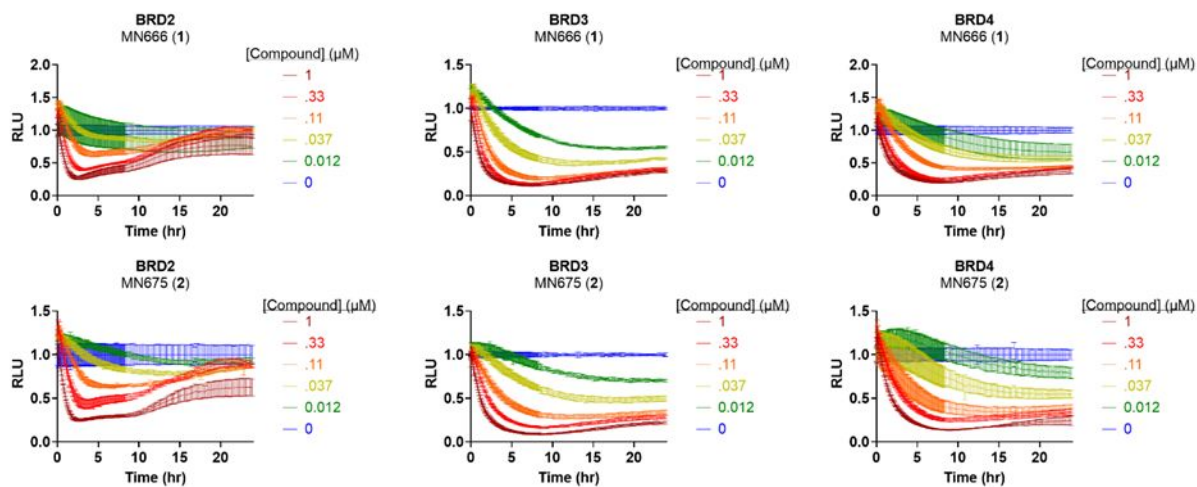

**Supplementary Figure 1** (related to Figure 3): Representative kinetic traces of first generation heterotrivalent PROTACs in HiBiT-BRD2, BRD3, and BRD4 HEK293 cells. Cells were treated with a dilution series ranging from 1  $\mu$ M - 12 nM compound. For all panels, each plot shows a single representative experiment with n=3 technical replicates; error bars represent S.D.

**Supplementary Table 1** (related to Figure 3): **Quantification of EC<sub>50</sub> values from cellular proliferation assays with dBET6, MZ1 and heterotrivalent PROTACs 1 and 2 in WT, CRBN KO, VHL KO and CRBN/VHL dKO RKO cell lines.**

| RKO line     | EC <sub>50</sub> (nM) <sup>a</sup> |            |        |            |           |              |           |              |
|--------------|------------------------------------|------------|--------|------------|-----------|--------------|-----------|--------------|
|              | dBET6                              | 95% CI     | MZ1    | 95% CI     | MN666 (1) | 95% CI       | MN675 (2) | 95% CI       |
| WT           | 281                                | 237 to 327 | 212    | 183 to 246 | 720       | 550 to 1001  | 489       | 435 to 552   |
| CRBN KO      | >10000                             | -          | 181    | 144 to 228 | 703       | 589 to 844   | 601       | 467 to 773   |
| VHL KO       | 233                                | 203 to 267 | >10000 | -          | 336       | 287 to 397   | 870       | 732 to 1079  |
| CRBN/VHL dKO | >10000                             | -          | >10000 | -          | 1579      | 1184 to 2464 | 2063      | 1585 to 3112 |

<sup>a</sup> Data is colour scaled for lowest (green), median (yellow) and highest (red) EC<sub>50</sub> values in nM.



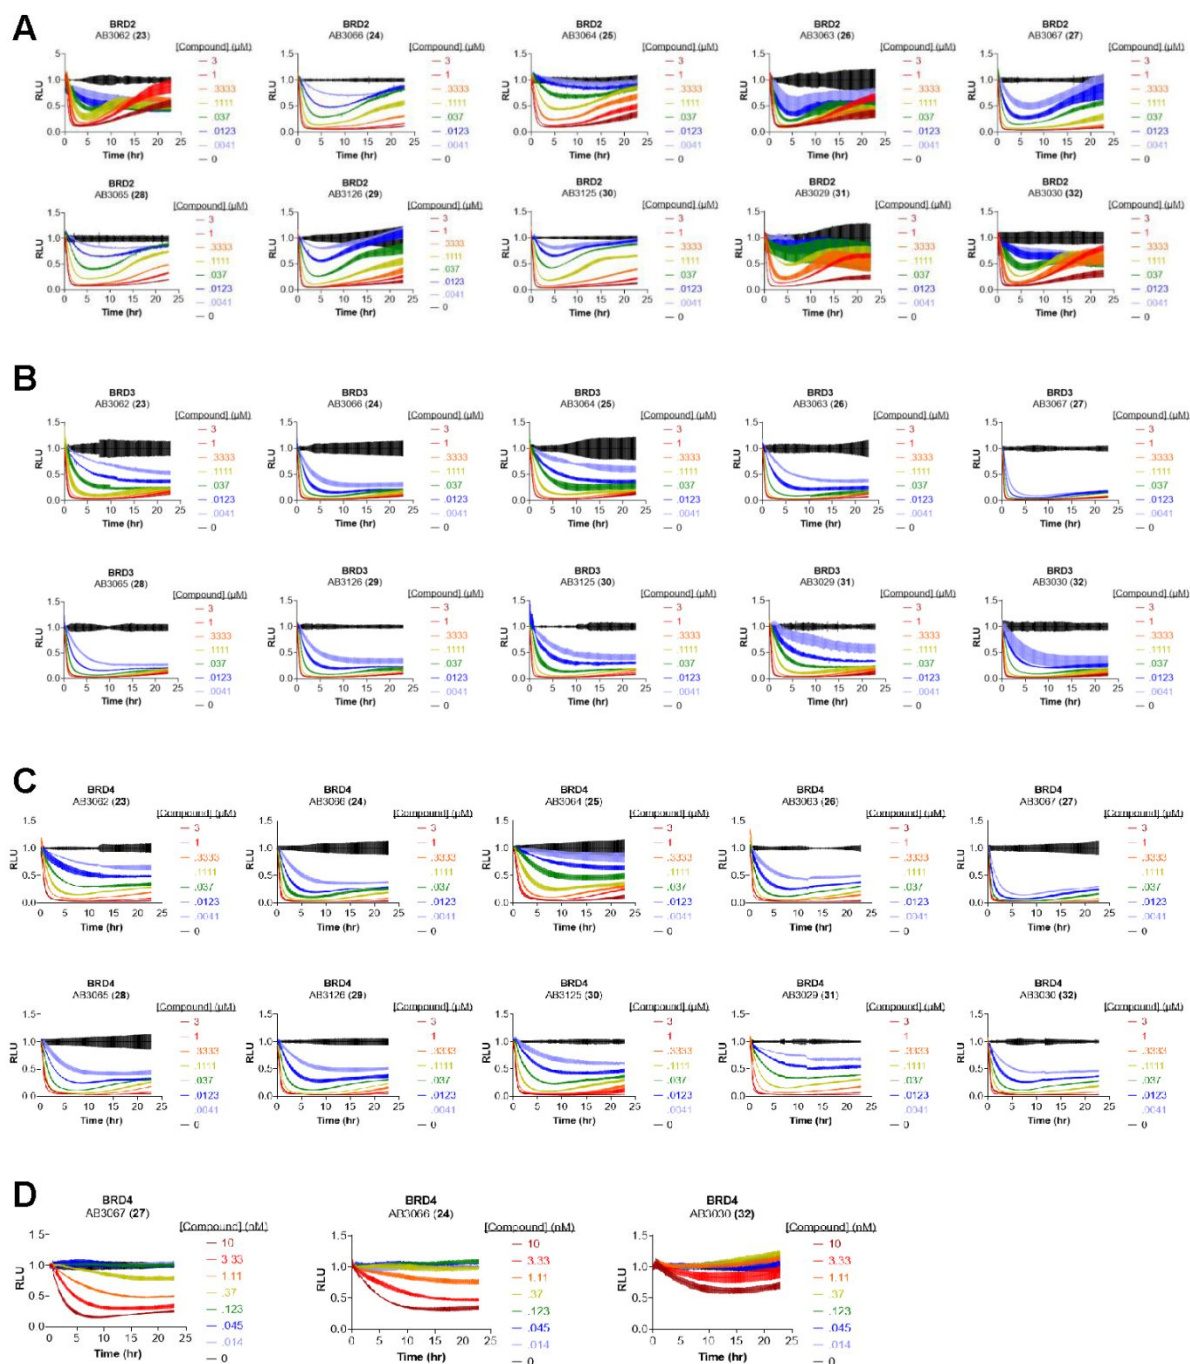

**Supplementary Figure 2** (related to Figure 4): (A-C) Kinetic traces of second generation heterotrivalent PROTACs in HiBiT-BRD2 (A), BRD3 (B), and BRD4 (C) HEK293 cells. Cells were treated with a dilution series ranging from 3  $\mu\text{M}$  - 4 nM compound. (D) Raw kinetic traces of HiBiT-BRD4 HEK293 cells treated with an extended nanomolar 3-fold dilution series ranging from 10 nM to 0.014 nM of compounds 27, 24, and 32. For all panels, each plot shows a single representative experiment with n=3 technical replicates; error bars represent S.D.

**Supplementary Table 2** (related to Figure 4B & Table 3): **Quantification of live-cell degradation parameter  $D_{\max 50}$  with heterotrivalent PROTACs 1, 2 and 23 – 32 against BET proteins in HiBiT-BRD knock-in HEK293 cells.**

| Compound             | $D_{\max 50}$ , nM <sup>a</sup> |              |       |                          |      |                        |
|----------------------|---------------------------------|--------------|-------|--------------------------|------|------------------------|
|                      | BRD4                            | 95% CI       | BRD3  | 95% CI                   | BRD2 | 95% CI                 |
| MN666 ( <b>1</b> )   | 37                              | 29 to 48     | -     | -                        | -    | -                      |
| MN675 ( <b>2</b> )   | 55                              | 37 to 97     | -     | -                        | -    | -                      |
| AB3062 ( <b>23</b> ) | 11                              | 9.5 to 12    | 5.7   | 3.8 to 8.0               | 16   | 3.8 to und             |
| AB3066 ( <b>24</b> ) | 3.0                             | 2.6 to 3.5   | 0.12  | und <sup>b</sup> to 1.4  | 7.3  | 5.3 to 9.2             |
| AB3064 ( <b>25</b> ) | 31                              | 24 to 40     | 8.1   | 5.8 to 12                | 74   | 59 to 93               |
| AB3029 ( <b>31</b> ) | 15                              | 13 to 16     | 6.2   | 4.8 to 7.9               | 160  | 61 to und <sup>b</sup> |
| AB3063 ( <b>26</b> ) | 3.0                             | 2.6 to 3.3   | 1.5   | 0.70 to 2.2              | 4.7  | 2.7 to 7.5             |
| AB3067 ( <b>27</b> ) | 0.64                            | 0.50 to 0.80 | 0.085 | und <sup>b</sup> to 0.43 | 2.0  | 0.37 to 3.5            |
| AB3065 ( <b>28</b> ) | 2.9                             | 2.4 to 3.4   | 1.2   | 0.92 to 1.5              | 23   | 20 to 27               |
| AB3126 ( <b>29</b> ) | 4.0                             | 3.6 to 4.5   | 1.9   | 1.2 to 2.4               | 18   | 15 to 22               |
| AB3125 ( <b>30</b> ) | 8.2                             | 7.2 to 9.3   | 3.0   | 2.2 to 3.9               | 31   | 22 to 29               |
| AB3030 ( <b>32</b> ) | 7.4                             | 5.6 to 10    | 1.7   | 0.47 to 2.8              | 25   | 12 to 130              |

<sup>a</sup> Data is colour scaled for lowest (green), median (yellow), and highest (red)  $D_{\max 50}$  values. <sup>b</sup> “und.” indicates the fit of the 95% CI is undefined.

**Supplementary Table 3** (related to Figure 4C & Table 3): **Quantification of live-cell degradation parameter degradation rate ( $\lambda_{\max}$ ) with heterotrivalent PROTACs 1, 2 and 23 – 32 against BET proteins in HiBiT-BRD knock-in HEK293 cells.**

| Compound             | $\lambda_{\max}$ , h <sup>-1</sup> <sup>a</sup> |              |      |              |      |              |
|----------------------|-------------------------------------------------|--------------|------|--------------|------|--------------|
|                      | BRD4                                            | 95% CI       | BRD3 | 95% CI       | BRD2 | 95% CI       |
| AB3062 ( <b>23</b> ) | 1.40                                            | 1.36 to 1.44 | 2.06 | 1.99 to 2.13 | 1.12 | 0.93 to 1.33 |
| AB3066 ( <b>24</b> ) | 2.16                                            | 2.09 to 2.24 | 2.66 | 2.55 to 2.78 | 2.04 | 1.88 to 2.21 |
| AB3064 ( <b>25</b> ) | 1.09                                            | 1.06 to 1.11 | 1.69 | 1.62 to 1.75 | 1.34 | 1.25 to 1.44 |
| AB3029 ( <b>31</b> ) | 1.99                                            | 1.94 to 2.04 | 2.36 | 2.23 to 2.51 | 1.90 | 1.75 to 2.06 |
| AB3063 ( <b>26</b> ) | 1.98                                            | 1.89 to 2.07 | 2.54 | 2.45 to 2.64 | 1.72 | 1.57 to 1.88 |
| AB3067 ( <b>27</b> ) | 2.68                                            | 2.56 to 2.81 | 3.31 | 3.15 to 3.47 | 2.37 | 2.21 to 2.53 |
| AB3065 ( <b>28</b> ) | 1.51                                            | 1.46 to 1.55 | 2.14 | 2.06 to 2.23 | 1.46 | 1.34 to 1.58 |
| AB3126 ( <b>29</b> ) | 1.69                                            | 1.68 to 1.79 | 2.62 | 2.54 to 2.71 | 2.35 | 2.19 to 2.52 |
| AB3125 ( <b>30</b> ) | 1.76                                            | 1.70 to 1.84 | 2.60 | 2.48 to 2.72 | 2.63 | 2.54 to 2.72 |
| AB3030 ( <b>32</b> ) | 2.19                                            | 2.10 to 2.29 | 2.97 | 2.86 to 3.09 | 2.04 | 1.90 to 2.20 |

<sup>a</sup> Data is colour scaled for highest (green), median (yellow), and lowest (red)  $D_{\max 50}$  values.

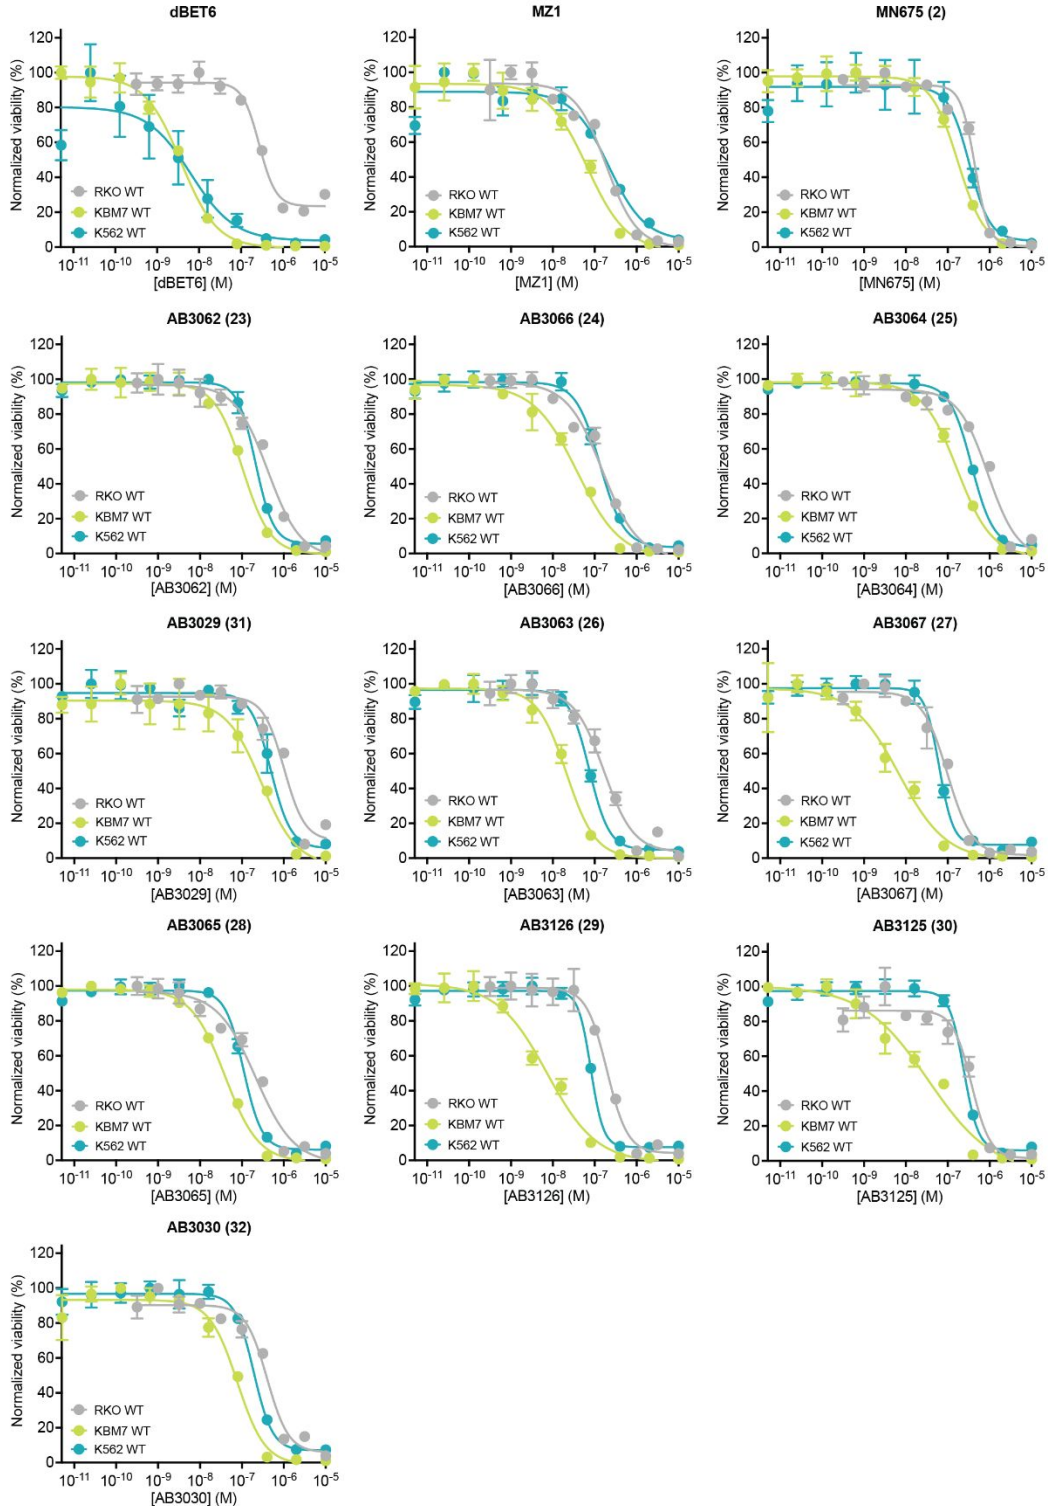

**Supplementary Figure 3: Cell viability evaluation of heterotrivalent PROTACs 23 - 32 in RKO, KBM7 & K562 cell lines.** Effect on cellular proliferation of dBET6, MZ1 and heterotrivalent PROTACs 2 and 23 - 32 after 316 pM to 10  $\mu$ M treatment in WT RKO or 5.12 pM to 10  $\mu$ M treatment in WT KBM7 and K562 cell lines. Mean  $\pm$  S.D.;  $n = 3$  biological replicates. EC<sub>50</sub> values are tabulated in Supplementary Table 2.

**Supplementary Table 4** (related to Supplementary Figure 2): **Quantification of EC<sub>50</sub> values from cellular proliferation assays with dBET6, MZ1 and heterotrivalent PROTACs 2 and 23 – 32 in WT RKO, KBM7 and K562 cell lines.**

| Compound    | EC <sub>50</sub> (nM) <sup>a</sup> |                 |       |                |       |                          |
|-------------|------------------------------------|-----------------|-------|----------------|-------|--------------------------|
|             | RKO                                | 95% CI          | KBM7  | 95% CI         | K562  | 95% CI                   |
| dBET6       | 271.6                              | 223.0 to 322.6  | 3.7   | 3.0 to 4.6     | 6.4   | 2.3 to 20.1              |
| MZ1         | 187.9                              | 134.5 to 259.9  | 66.2  | 44.9 to 97.7   | 216.3 | 121.2 to 478.8           |
| MN675 (2)   | 444.6                              | 390.4 to 510.5  | 175.4 | 144.1 to 214.0 | 327.3 | 219.1 to 513.0           |
| AB3062 (23) | 419.8                              | 319.8 to 563.7  | 104.2 | 87.7 to 124.4  | 212.3 | 187.9 to 239.3           |
| AB3066 (24) | 151.4                              | 115.7 to 196.3  | 38.0  | 28.4 to 50.7   | 133.7 | 113.4 to 158.5           |
| AB3064 (25) | 903.6                              | 668.5 to 1363.0 | 168.3 | 141.3 to 201.5 | 369.0 | 337.9 to 403.2           |
| AB3029 (31) | 1016.2                             | 729.0 to 1332.0 | 294.4 | 185.4 to 507.9 | 494.3 | 394.1 to 648.5           |
| AB3063 (26) | 165.2                              | 125.0 to 216.8  | 21.2  | 18.0 to 25.0   | 74.1  | 63.8 to 86.2             |
| AB3067 (27) | 97.5                               | 78.6 to 119.4   | 6.9   | 4.3 to 10.8    | 62.1  | 53.4 to und <sup>b</sup> |
| AB3065 (28) | 213.8                              | 151.4 to 302.8  | 39.4  | 34.6 to 44.8   | 110.2 | 96.6 to 126.4            |
| AB3126 (29) | 195.4                              | 161.5 to 236.1  | 7.3   | 5.2 to 10.2    | 80.5  | 74.9 to 87.1             |
| AB3125 (30) | 369.0                              | 284.4 to 468.4  | 34.1  | 19.1 to 64.1   | 242.1 | 207.8 to 295.1           |
| AB3030 (32) | 401.8                              | 311.7 to 509.8  | 78.0  | 58.3 to 102.7  | 192.3 | 158.0 to 231.7           |

<sup>a</sup> Data is colour scaled for lowest (green), median (yellow) and highest (red) EC<sub>50</sub> values in nM. <sup>b</sup> “und.” indicates the fit of the 95% CI is undefined.

**Supplementary Table 5** (related to Figure 5 and Figure 8C): **Quantification of EC<sub>50</sub> values from cellular proliferation assays with heterotrivalent PROTACs 26, 27 and 86 in WT, CRBN KO, VHL KO and CRBN/VHL dKO RKO cell lines.**

| RKO line     | EC <sub>50</sub> (nM) <sup>a</sup> |              |             |             |             |          |
|--------------|------------------------------------|--------------|-------------|-------------|-------------|----------|
|              | AB3063 (26)                        | 95% CI       | AB3067 (27) | 95% CI      | AB3124 (86) | 95% CI   |
| WT           | 260                                | 226 to 294   | 111         | 104 to 121  | 33          | 22 to 52 |
| CRBN KO      | 408                                | 335 to 501   | 180         | 149 to 215  | 34          | 26 to 44 |
| VHL KO       | 819                                | 651 to 1013  | 133         | 121 to 145  | 62          | 51 to 75 |
| CRBN/VHL dKO | 2235                               | 1435 to 6027 | 988         | 695 to 1902 | 16          | 13 to 20 |

<sup>a</sup> Data is colour scaled for lowest (green), median (yellow) and highest (red) EC<sub>50</sub> values in nM.

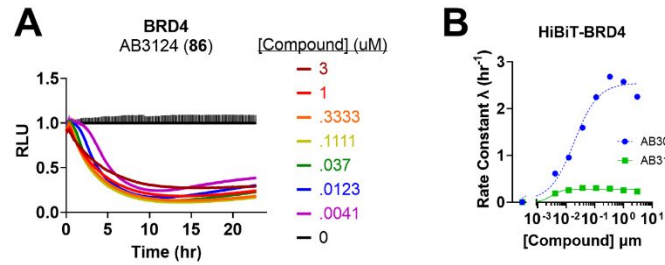

**Supplementary Figure 4** (related to Figure 8): Kinetic traces associated with Figure 8. (A) 24-hour kinetic luminescence timecourse of HiBiT-BRD4 HEK293 cells supplied with an 8-point, 3-fold dilution series of **86** starting at 3  $\mu\text{M}$  ( $n=3$  technical replicates per concentration, error bars represent standard deviation). (B) BRD4 degradation rate constants mediated by **86** from the experiment in panel A of this figure) plotted alongside BRD4 degradation rate constants mediated by **27** (data replotted from Figure 4B) to allow for comparison of differences in degradation rate.

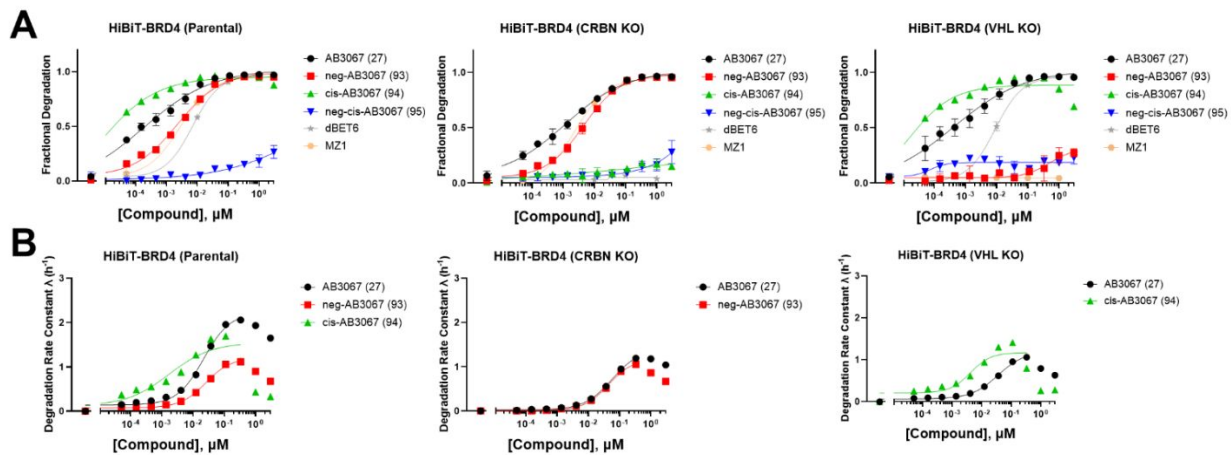

**Supplementary Figure 5: Degradation potency and rate of control compounds in HiBiT-BRD4 parental, VHL KO, and CRBN KO cells.** (A, B) Fractional degradation representing the  $D_{\text{max}}$  taken from individual kinetic profiles (A) and degradation rate constant determined from the kinetic profiles (B) of each cell line treated for 24h with an 8-point, 3-fold dilution series starting at 3  $\mu\text{M}$  of **27**, **93**, **94**, or **95**. A 3-point, 10-fold dilution series starting at 1  $\mu\text{M}$  of dBET6 and MZ1 were included in this experiment to show the specificity of KO of each E3 ligase.

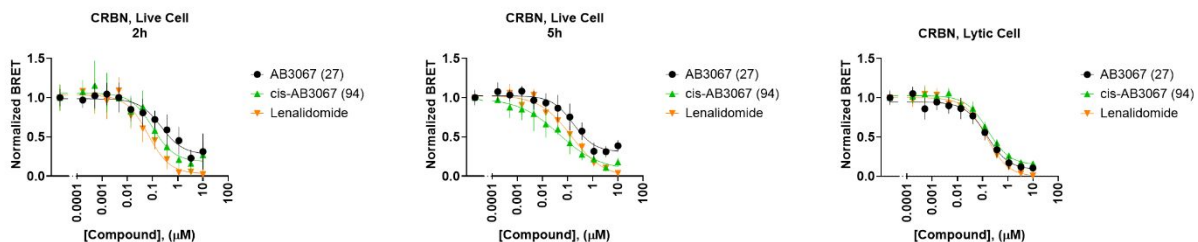



**Supplementary Figure 6. NanoBRET lytic and live cell target engagement assay of 27 and 94.** Competitive displacement profiles of HEK293 cells transiently transfected with NanoLuc-CRBN, which are incubated with a CRBN fluorescent tracer in the presence of serial dilutions of 27, 94 or lenalidomide in cells lysed with digitonin (Lytic cell) or in live cells for 2 h or 5 h. Data are represented as NanoBRET ratios normalized to 0  $\mu$ M compound. Error bars are expressed as S.D. of the mean of  $n = 2$  biological replicates (each consisting of 3 technical replicates) for 2 h Live Cell and Lytic and  $n=1$  biological replicate (consisting of 4 technical replicates) for 5 h Live Cell.

**Supplementary Table 6 (related to Figure 10): Quantification of EC<sub>50</sub> values from cellular proliferation assays with dBET6, MZ1 and heterotrivalent PROTACs 27 and 93 - 95 in WT, CRBN KO, VHL KO and CRBN/VHL dKO RKO cell lines.**

| RKO line     | EC <sub>50</sub> (nM) <sup>a</sup> |             |                             |             |
|--------------|------------------------------------|-------------|-----------------------------|-------------|
|              | MZ1                                | 95% CI      | <i>neg</i> -AB3067 (93)     | 95% CI      |
| WT           | 160                                | 136 to 189  | 107                         | 96 to 124   |
| CRBN KO      | 136                                | 118 to 158  | 105                         | 94 to 117   |
| VHL KO       | >5000                              | -           | 391                         | 324 to 504  |
| CRBN/VHL dKO | >5000                              | -           | 420                         | 328 to 550  |
| RKO line     | dBET6                              | 95% CI      | <i>cis</i> -AB3067 (94)     | 95% CI      |
| WT           | 256                                | 215 to 302  | 48                          | 40 to 58    |
| CRBN KO      | >10000                             | -           | 832                         | 652 to 1079 |
| VHL KO       | 291                                | 236 to 357  | 48                          | 39 to 60    |
| CRBN/VHL dKO | >10000                             | -           | 804                         | 626 to 1051 |
| RKO line     | AB3067 (27)                        | 95% CI      | <i>neg-cis</i> -AB3067 (95) | 95% CI      |
| WT           | 73                                 | 66 to 81    | 594                         | 460 to 786  |
| CRBN KO      | 82                                 | 71 to 94    | 586                         | 403 to 924  |
| VHL KO       | 110                                | 94 to 129   | 522                         | 388 to 726  |
| CRBN/VHL dKO | 818                                | 641 to 1078 | 657                         | 449 to 1014 |

<sup>a</sup> Data is colour scaled for lowest (green), median (yellow) and highest (red) EC<sub>50</sub> values in nM

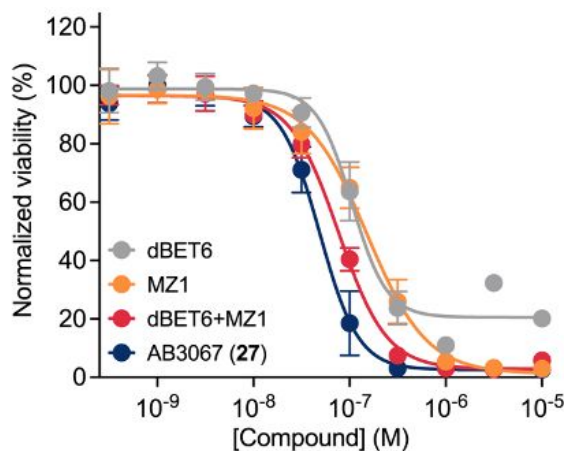

**Supplementary Figure 7** (related to Figure 10). **Cell viability assay with dBET6, MZ1, 27 and a 1:1 combination of dBET6 and MZ1 in BET sensitive RKO WT cells.** Effect on cellular proliferation of dBET6, MZ1, 27 and a 1:1 combination of dBET6 and MZ1 after 316 pM to 10  $\mu$ M treatment in WT RKO cells. dBET6 and MZ1 were added at 5  $\mu$ M for a total starting concentration of 10  $\mu$ M BET PROTAC and diluted therein. Mean  $\pm$  S.D.;  $n = 6$  biological replicates.

**Supplementary Table 7** (related to Supplementary Figure 7): **Quantification of EC<sub>50</sub> values from cellular proliferation assays with dBET6, MZ1, 27 and 1:1 combination of dBET6 and MZ1 in BET sensitive RKO WT cells.**

| Compound    | EC <sub>50</sub> (nM) <sup>a</sup> |            |
|-------------|------------------------------------|------------|
|             | RKO                                | 95% CI     |
| dBET6       | 106.0                              | 89 to 123  |
| MZ1         | 152.0                              | 132 to 175 |
| dBET6 + MZ1 | 77.0                               | 71 to 83   |
| AB3067 (27) | 49.0                               | 44 to 54   |

<sup>a</sup> Data is colour scaled for lowest (green), median (yellow) and highest (red) EC<sub>50</sub> values in nM.

Supplementary Figure 8 (related to Figure 4). **Uncropped Western Blotting images of the evaluation of heterotrivalent PROTACs 23 – 32 & 86 in HEK293 cells.** The boxed region represents the cropped area containing the target protein expression upon treatment with compound.

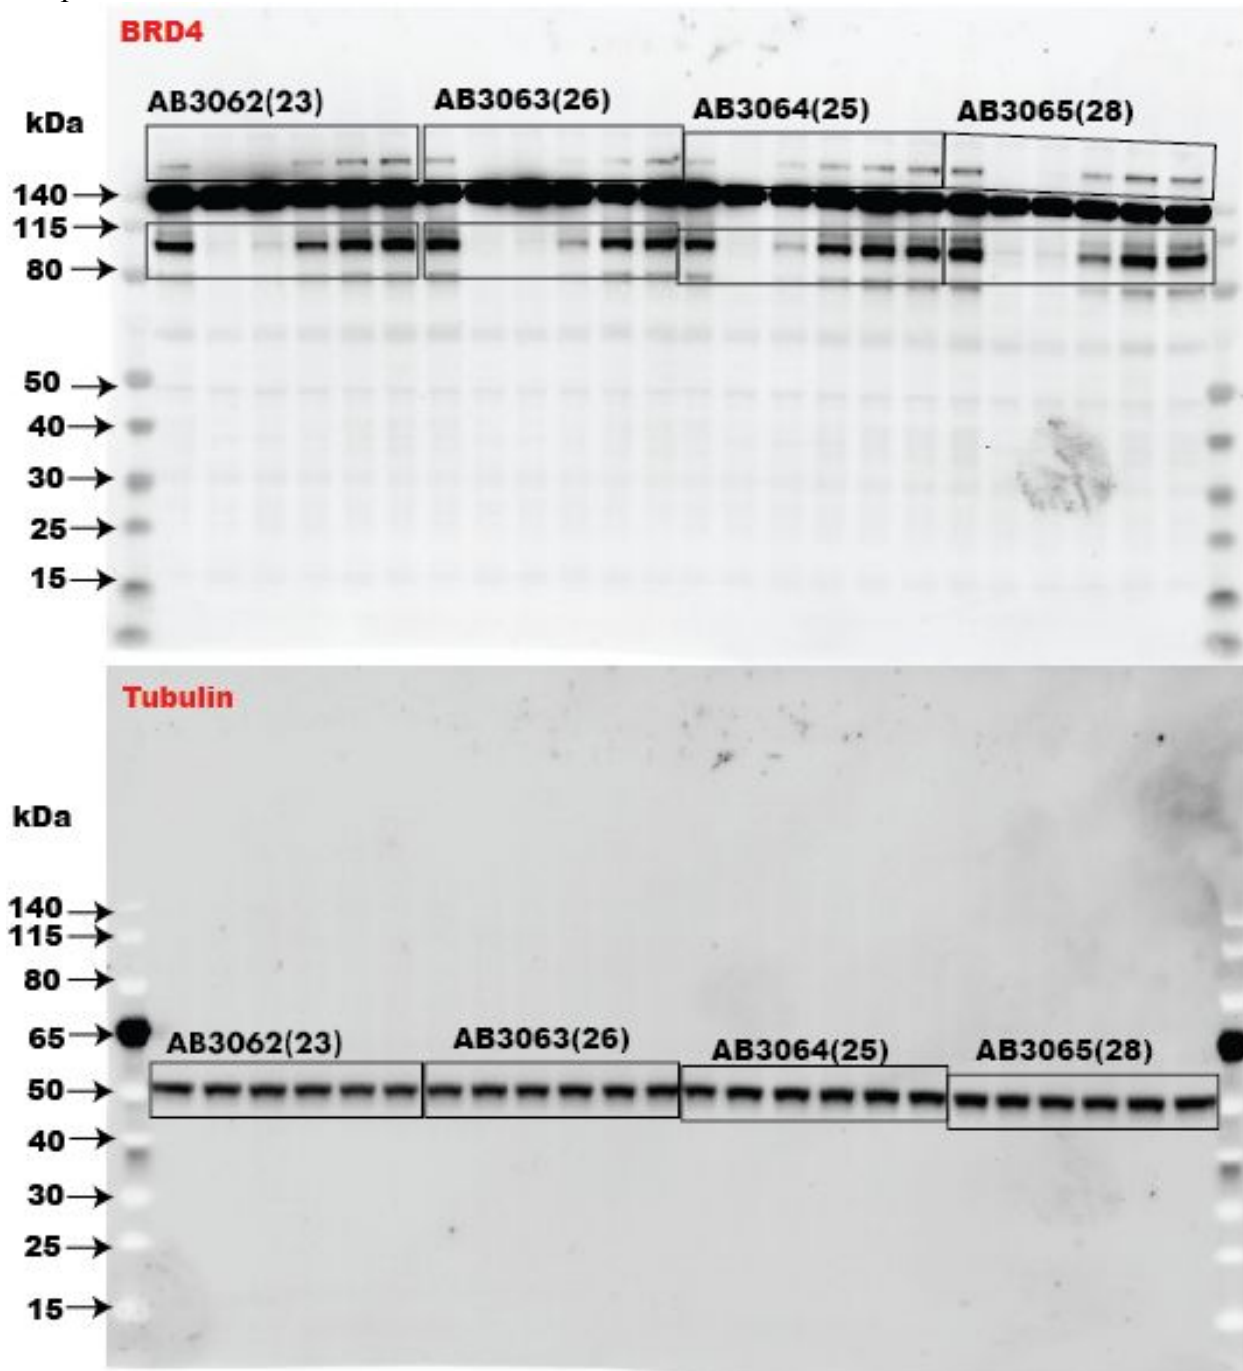



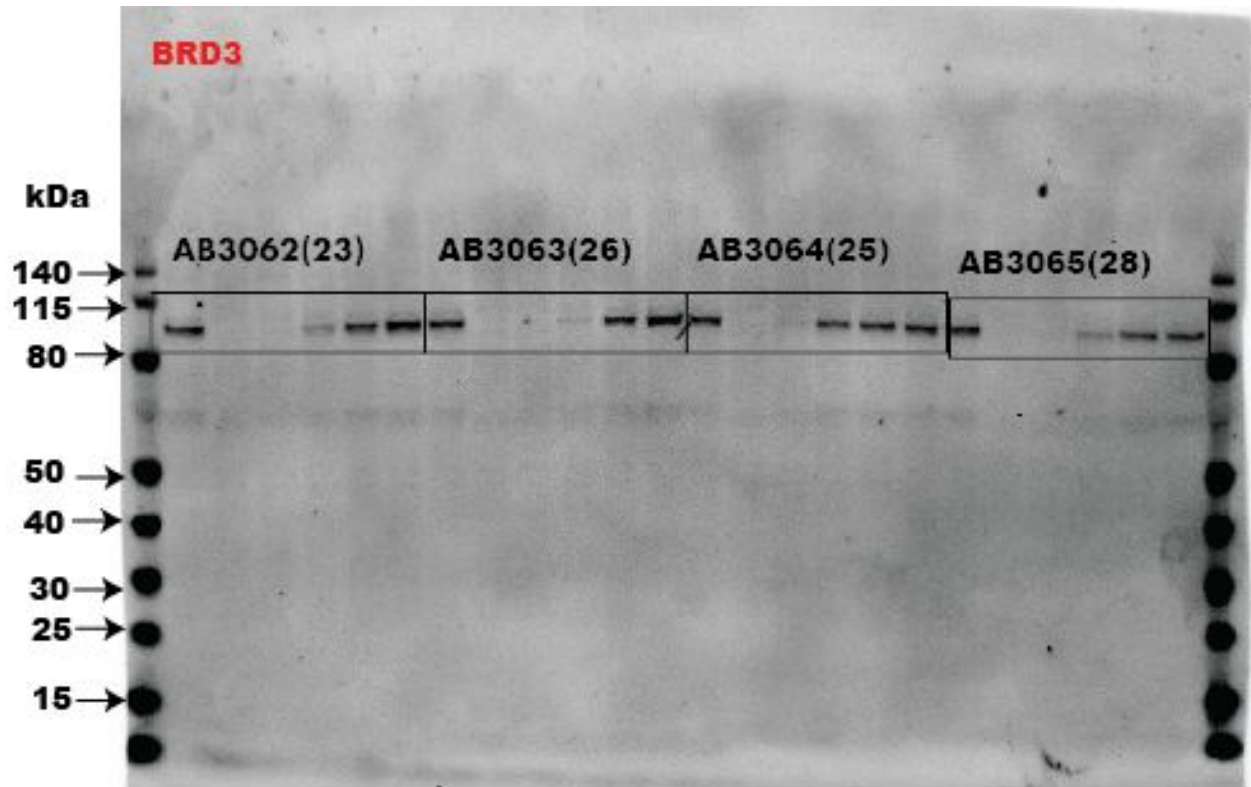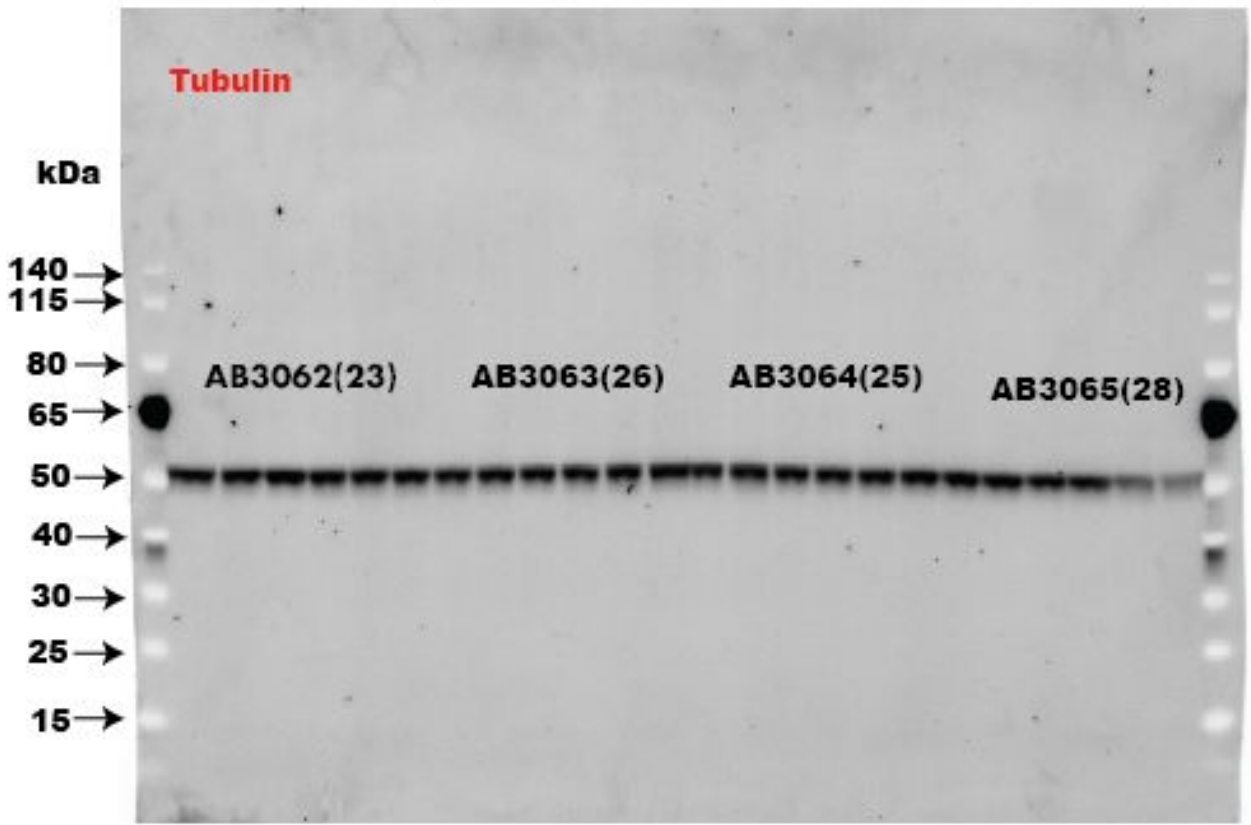

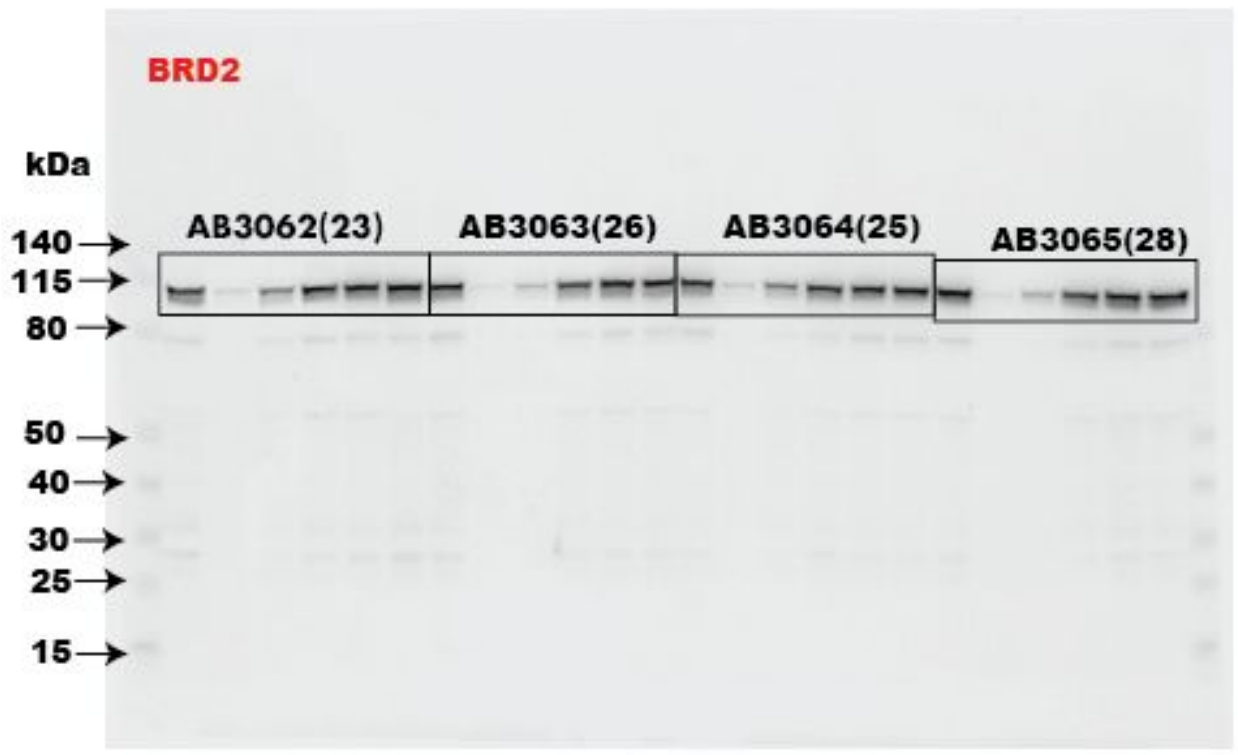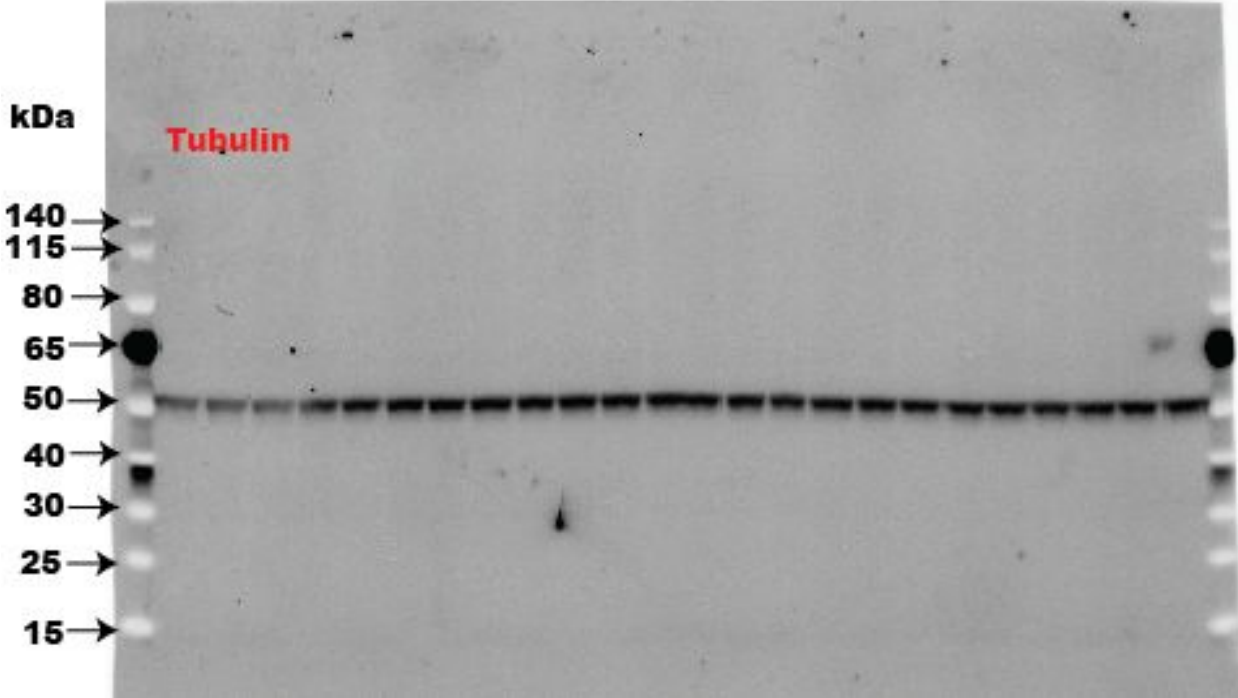

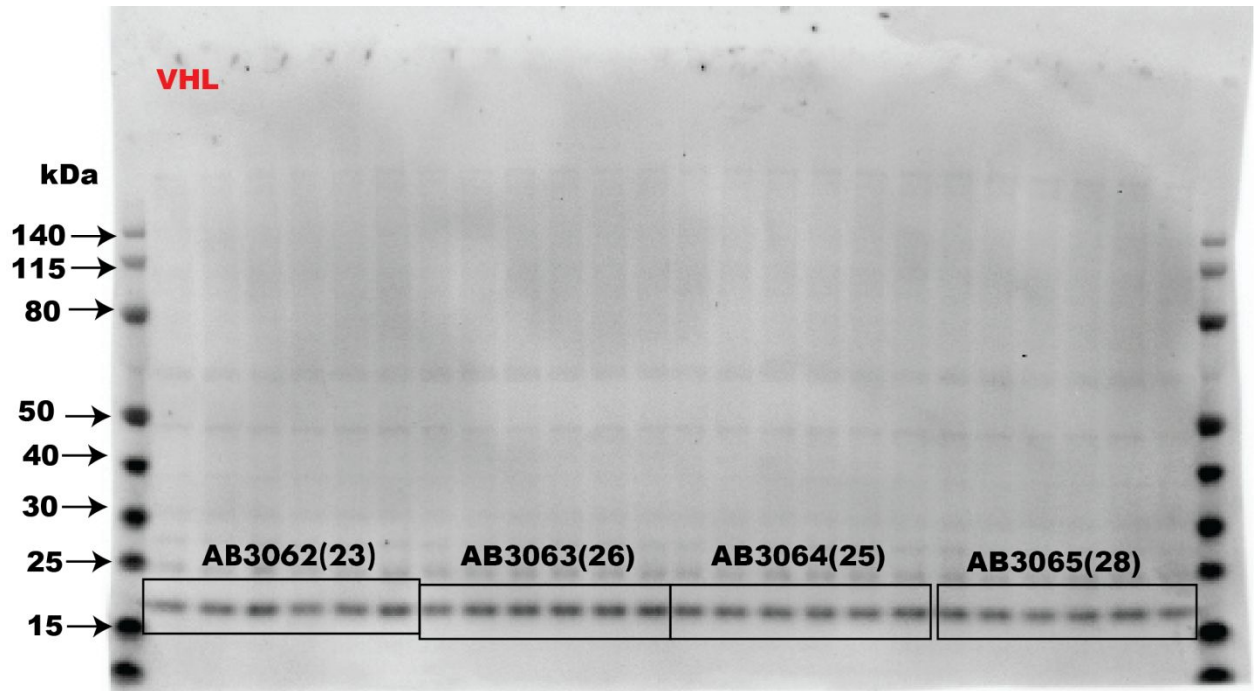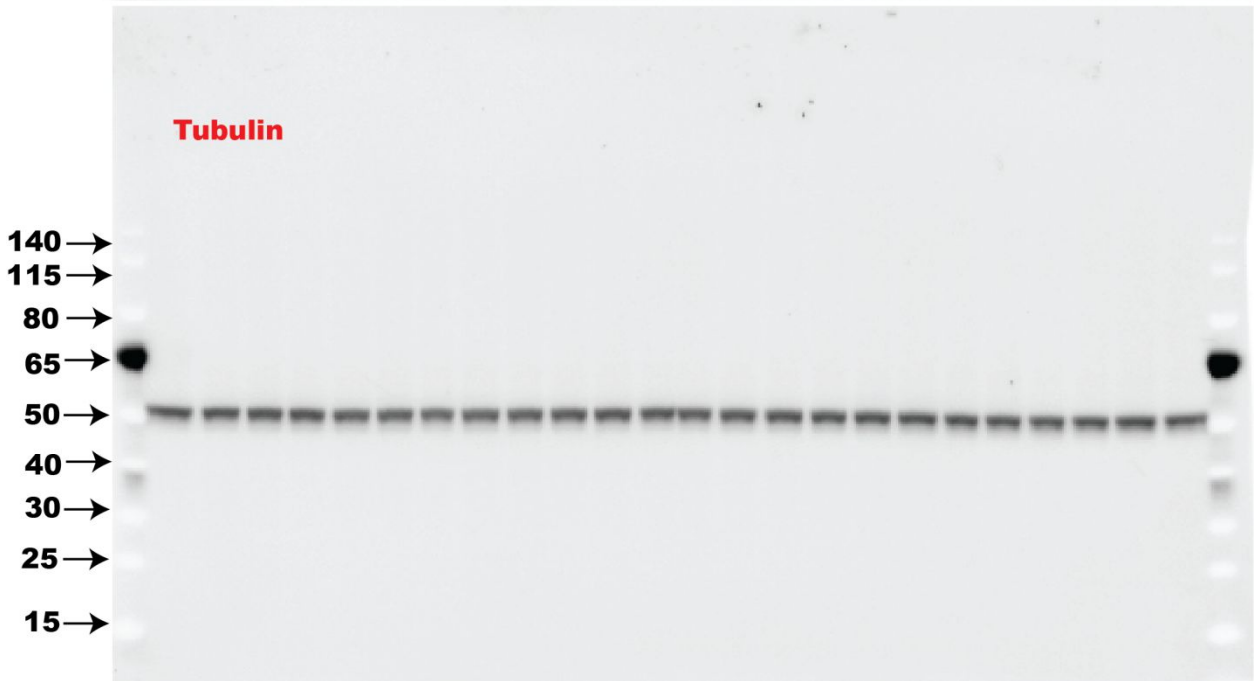

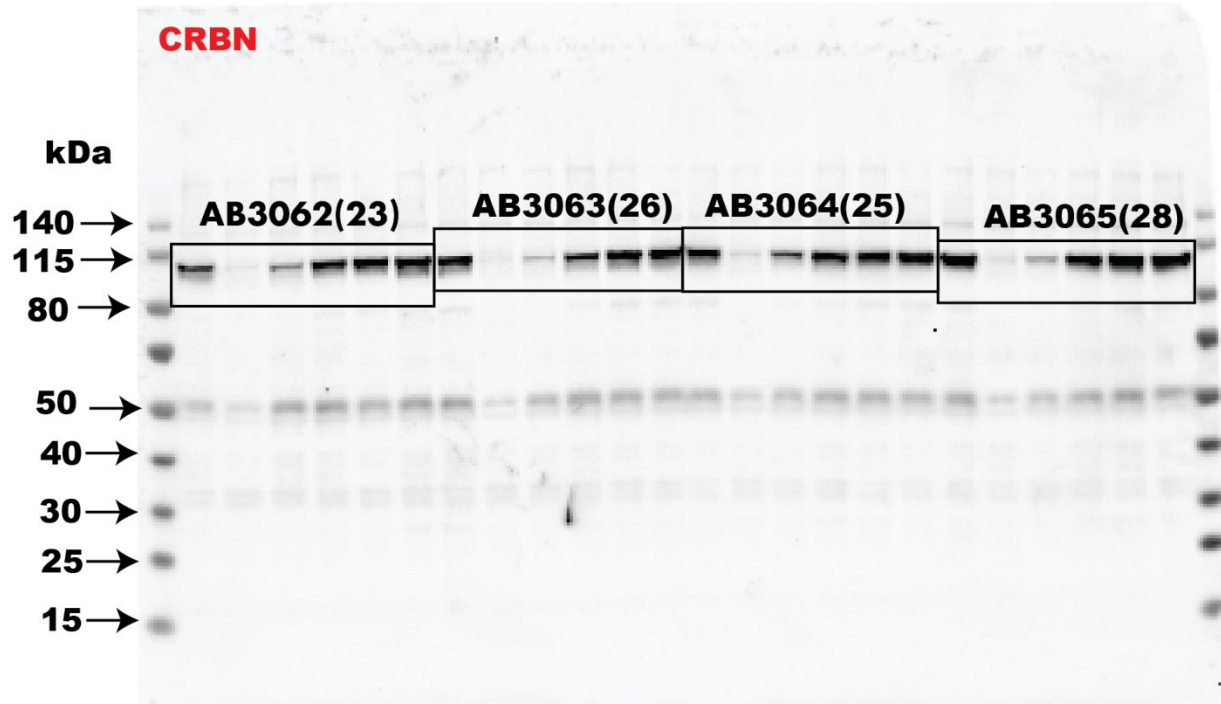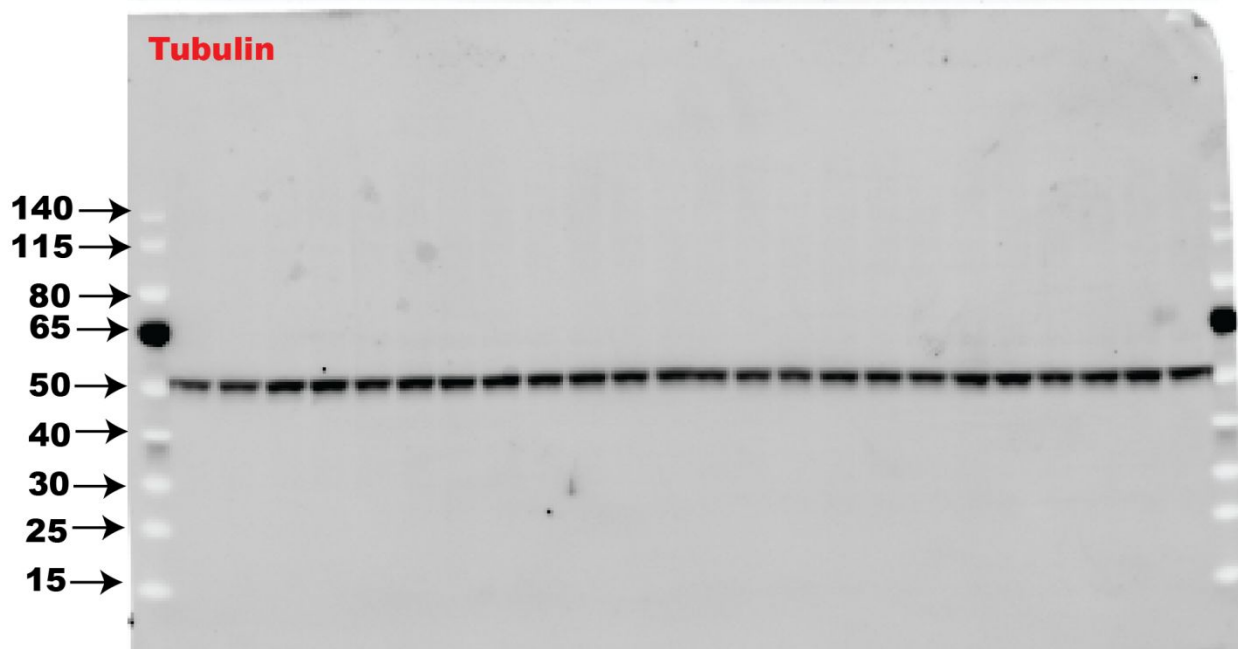

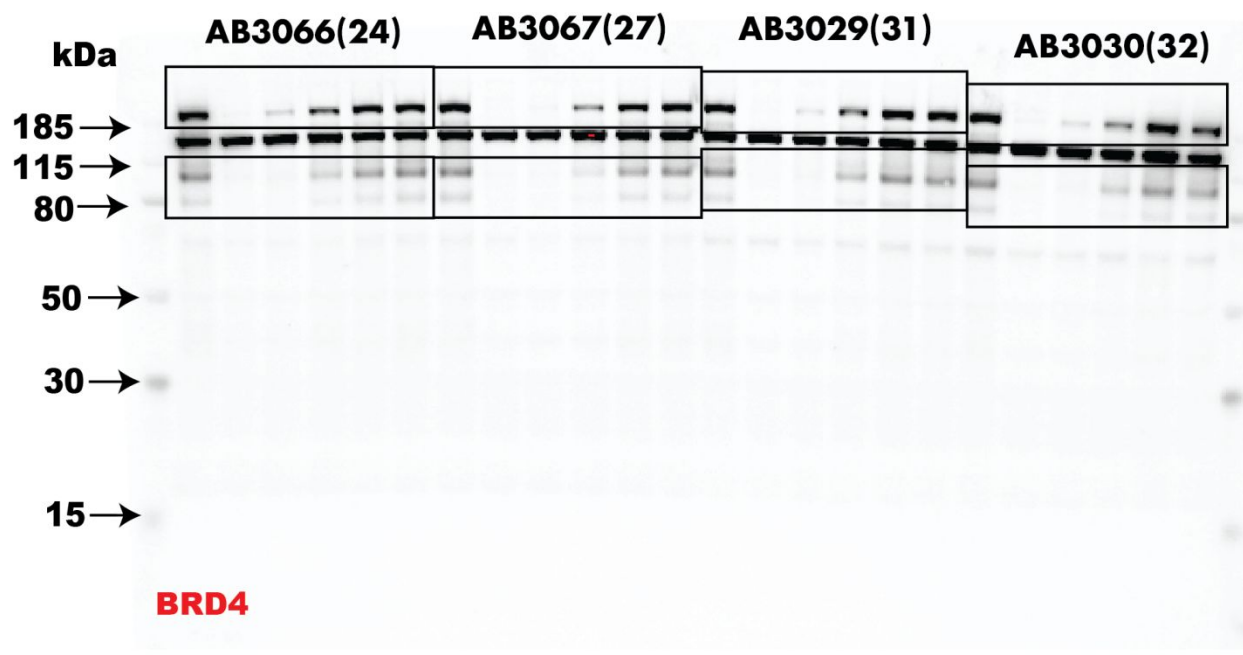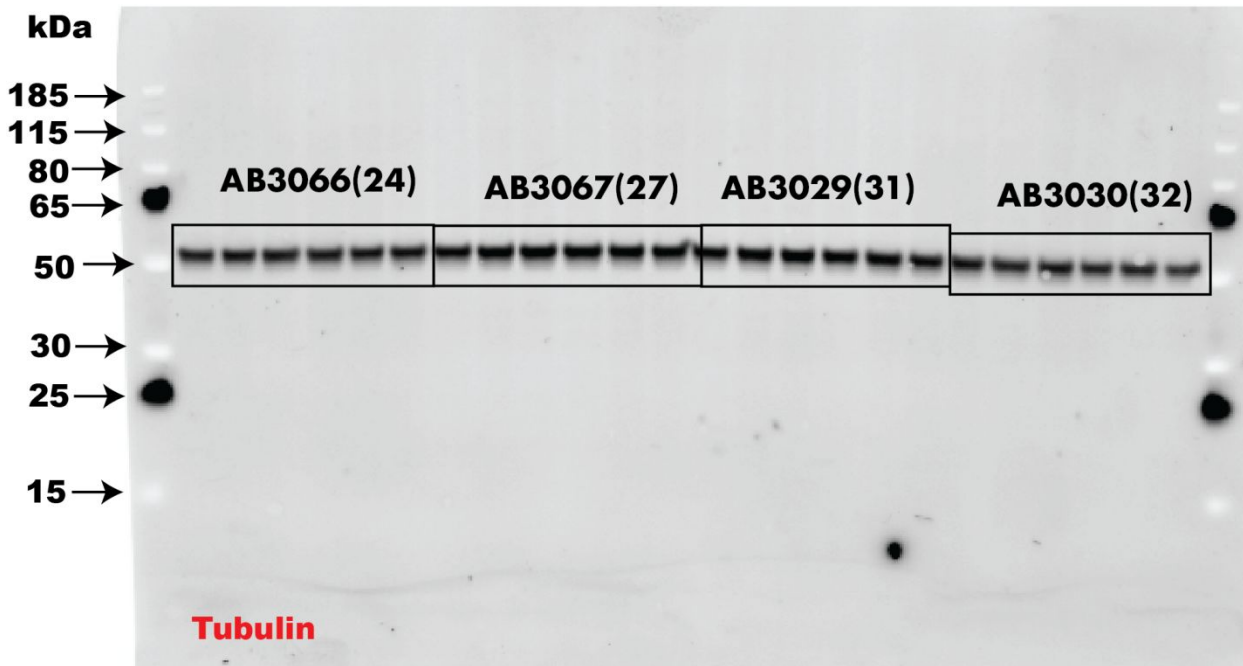

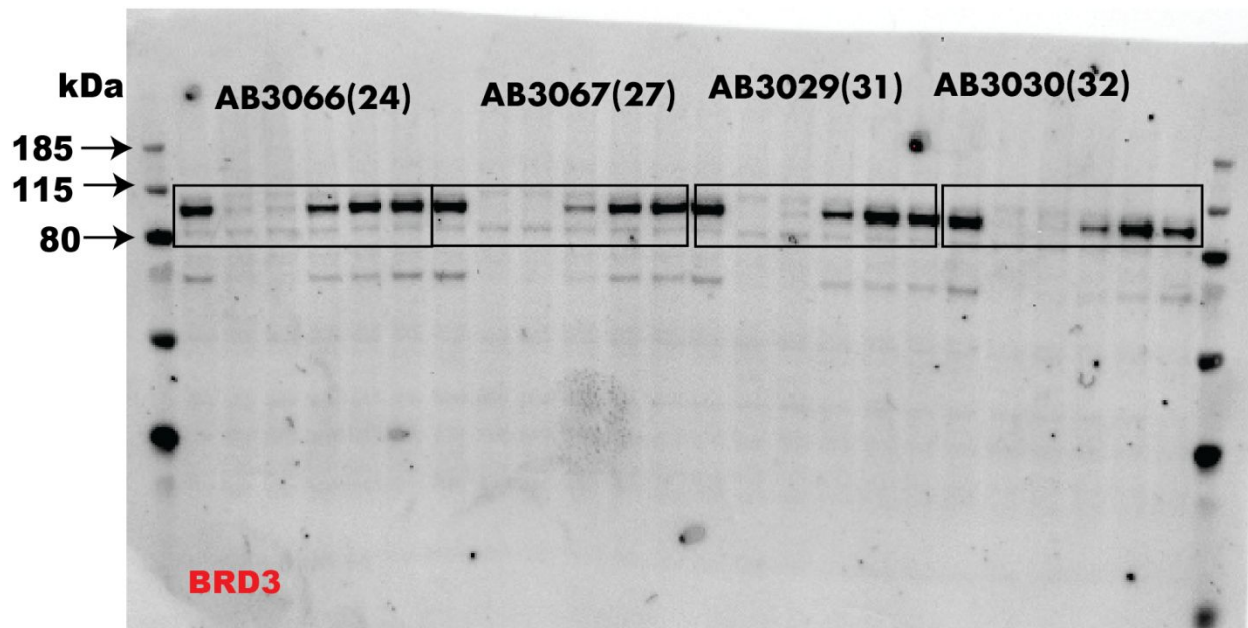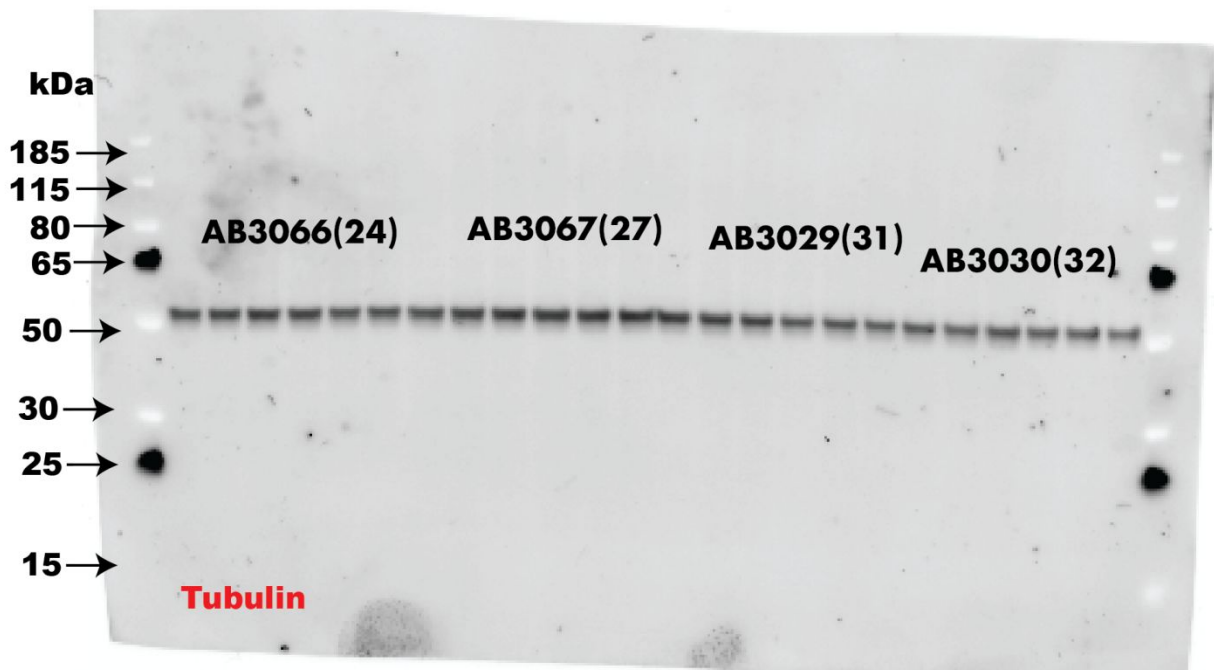



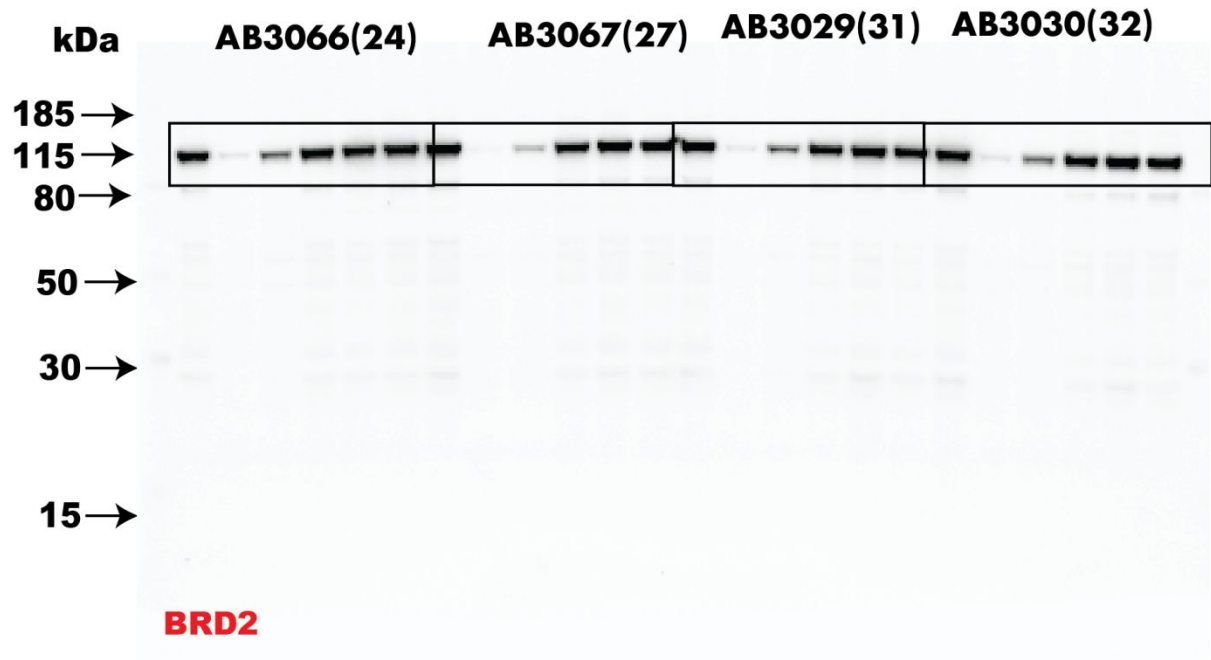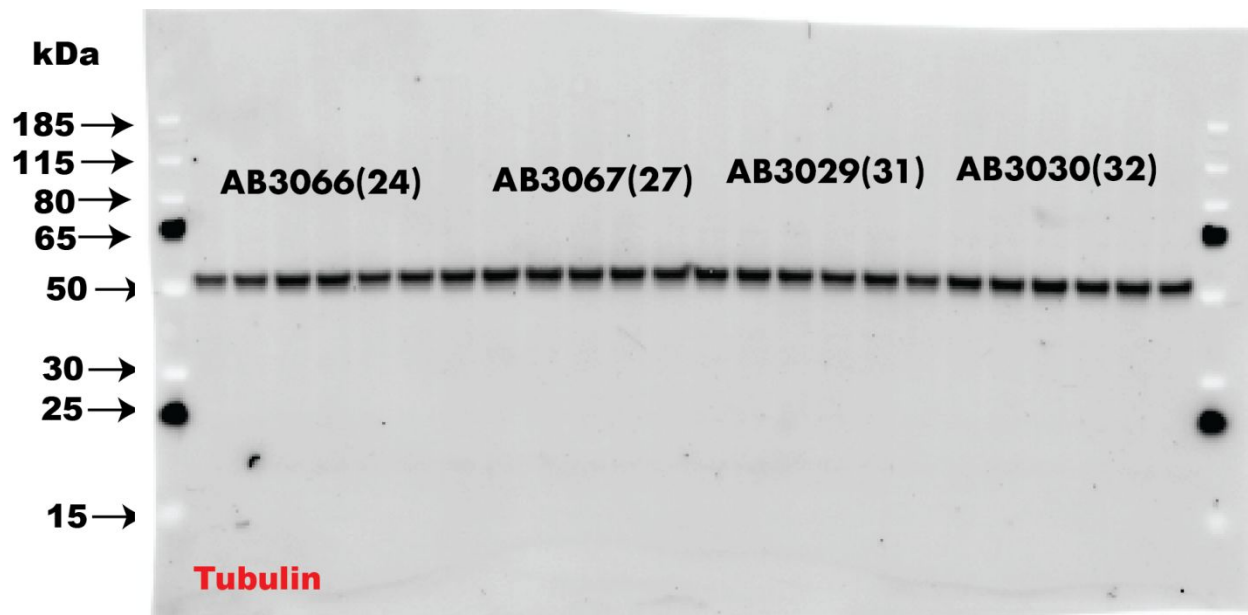

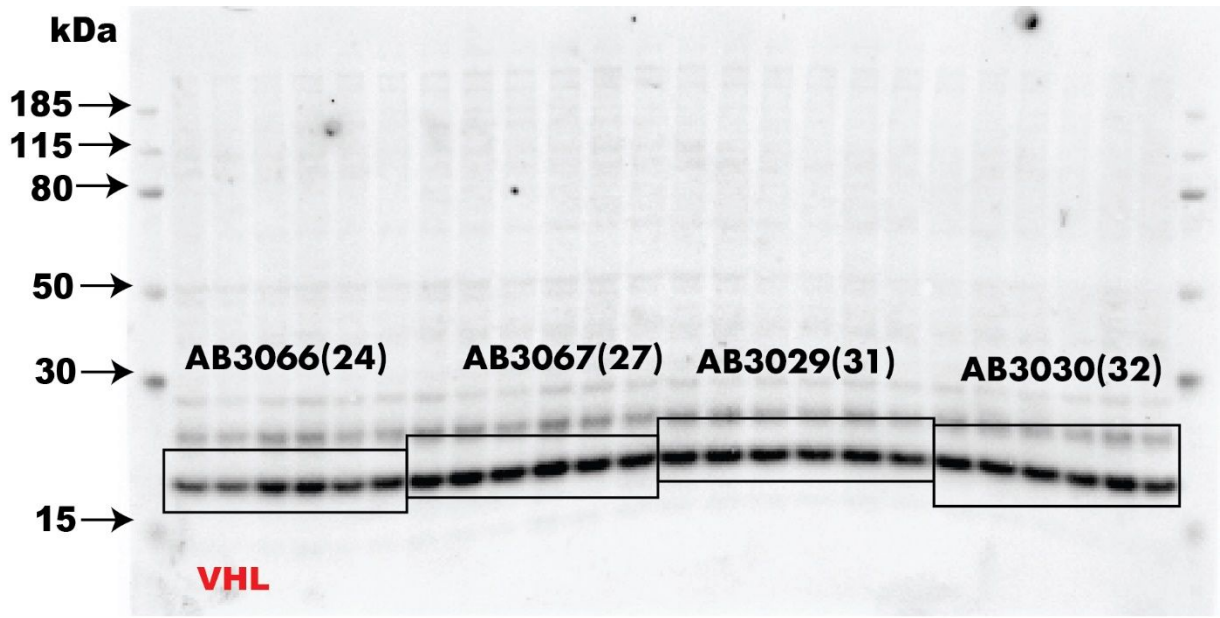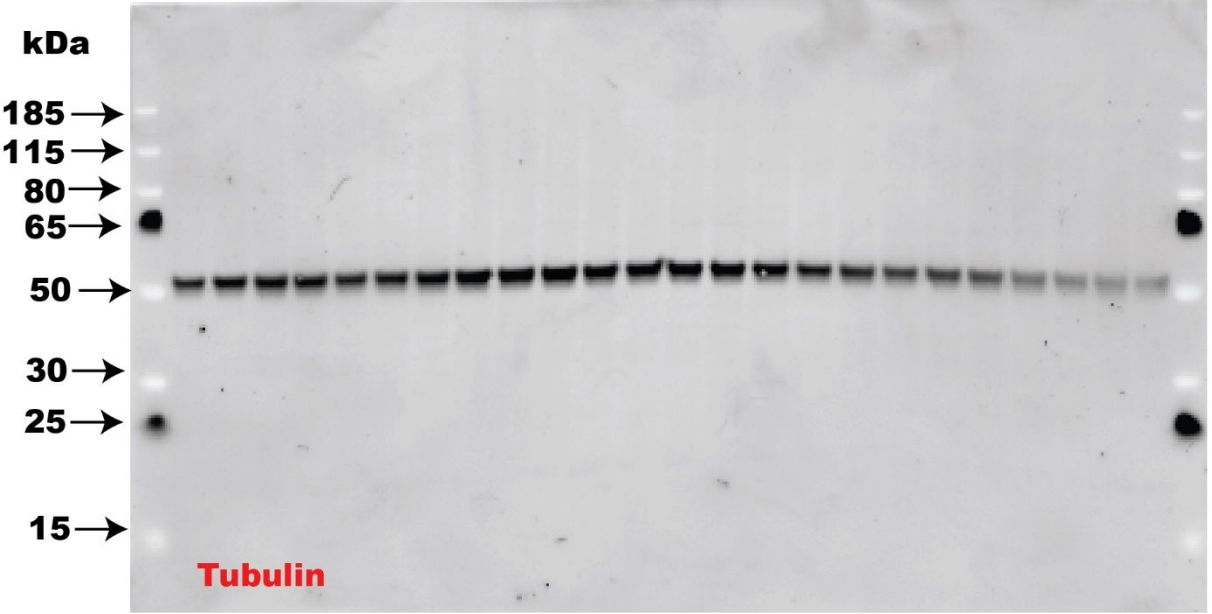



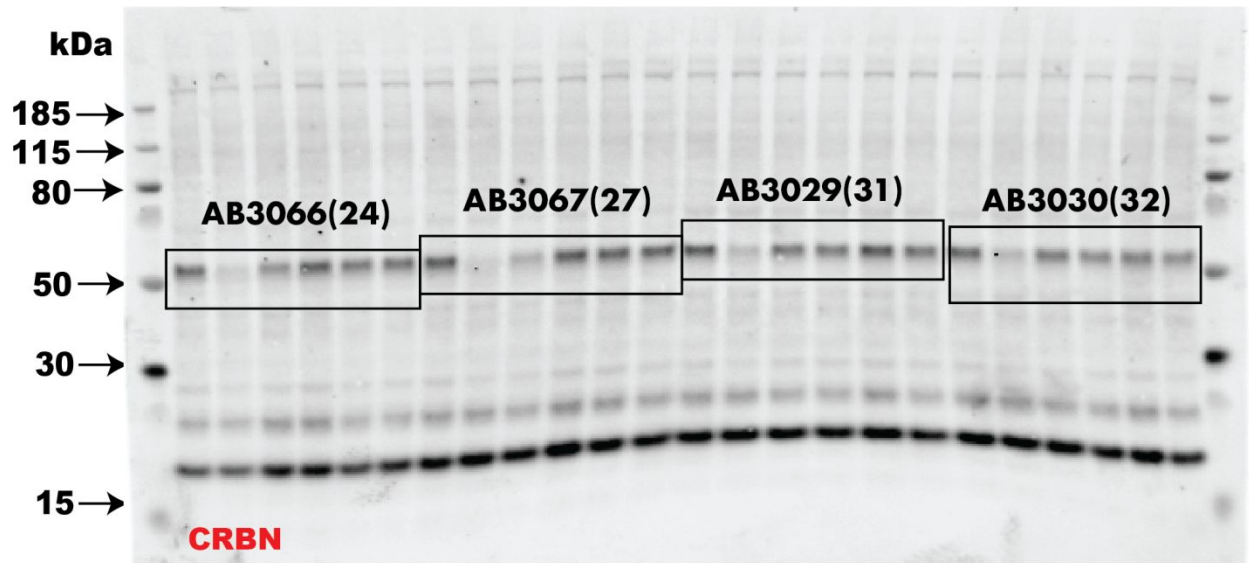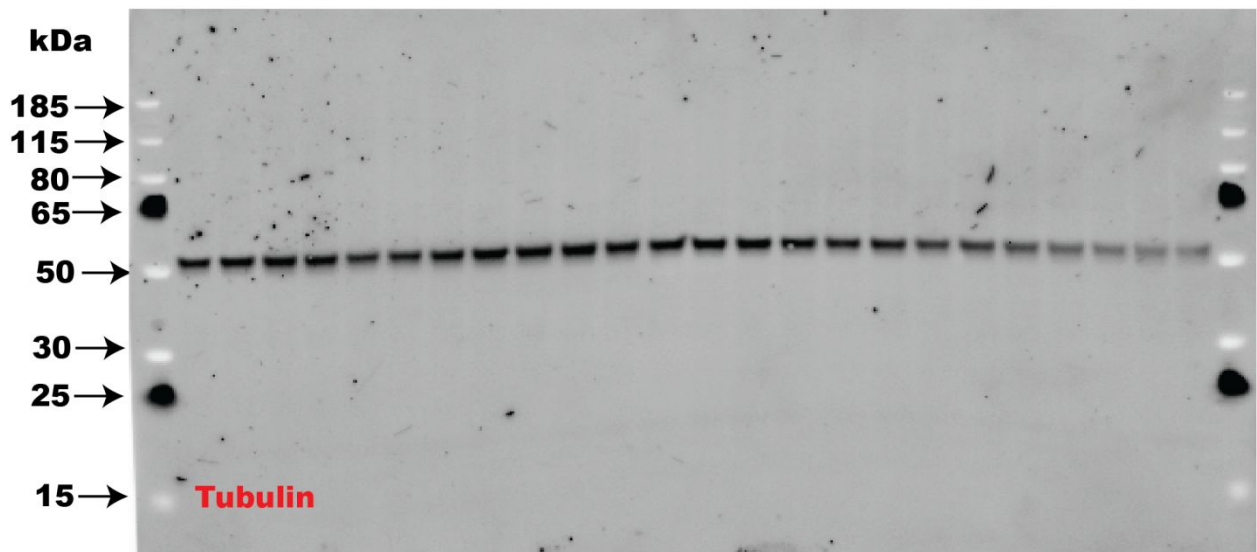

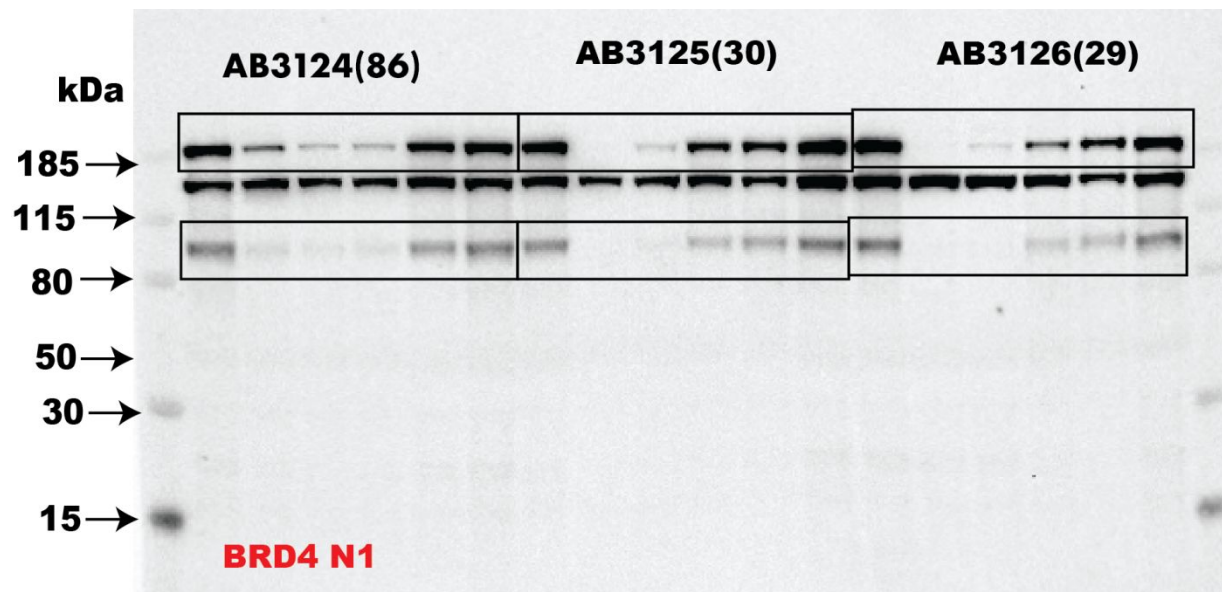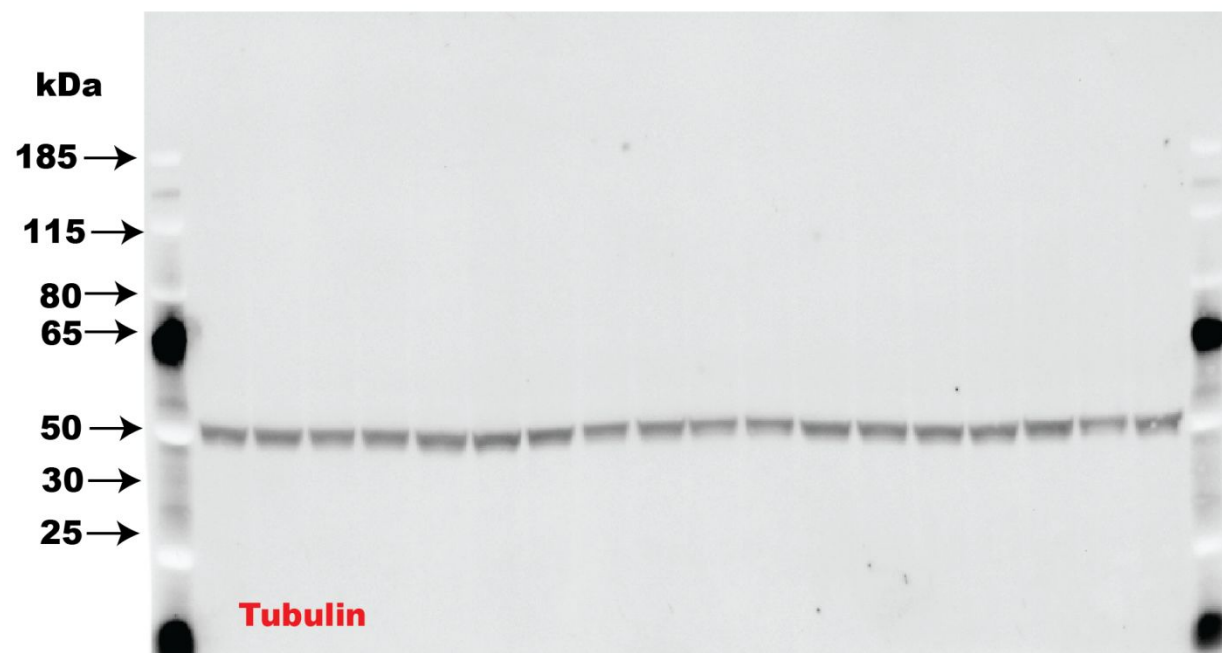

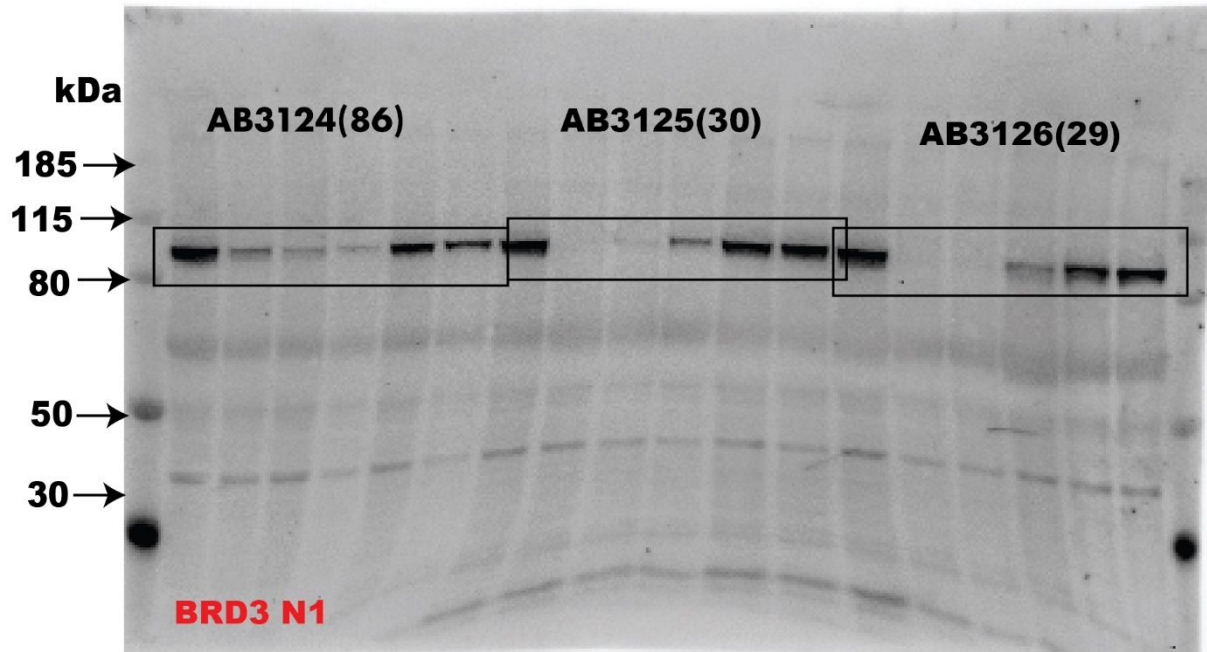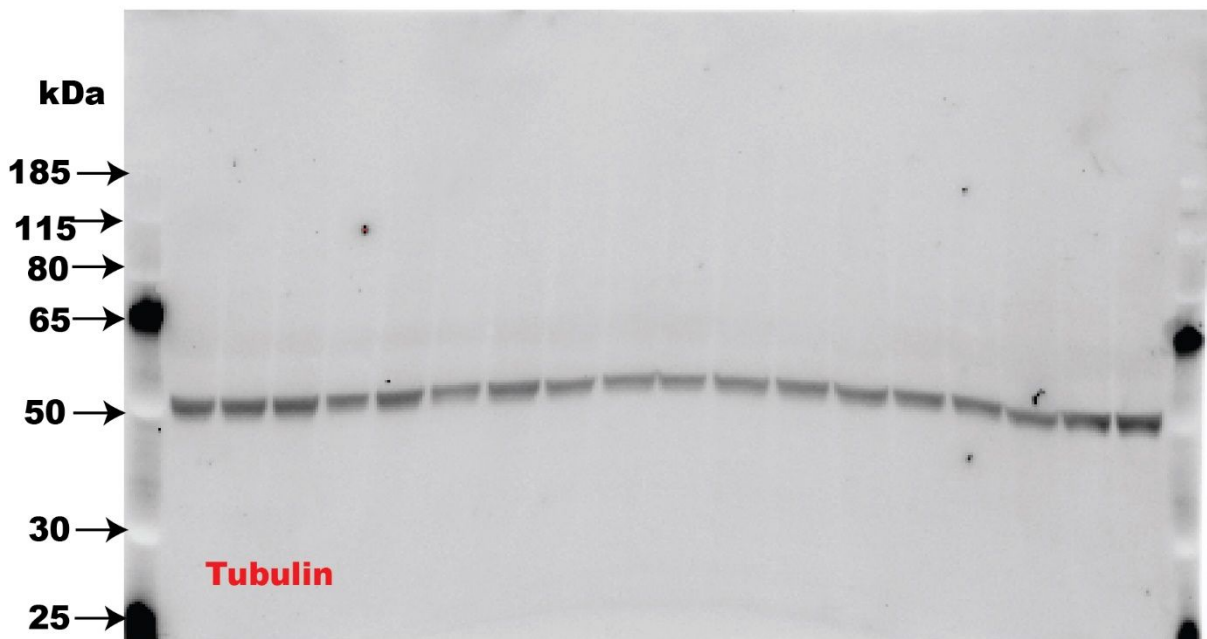

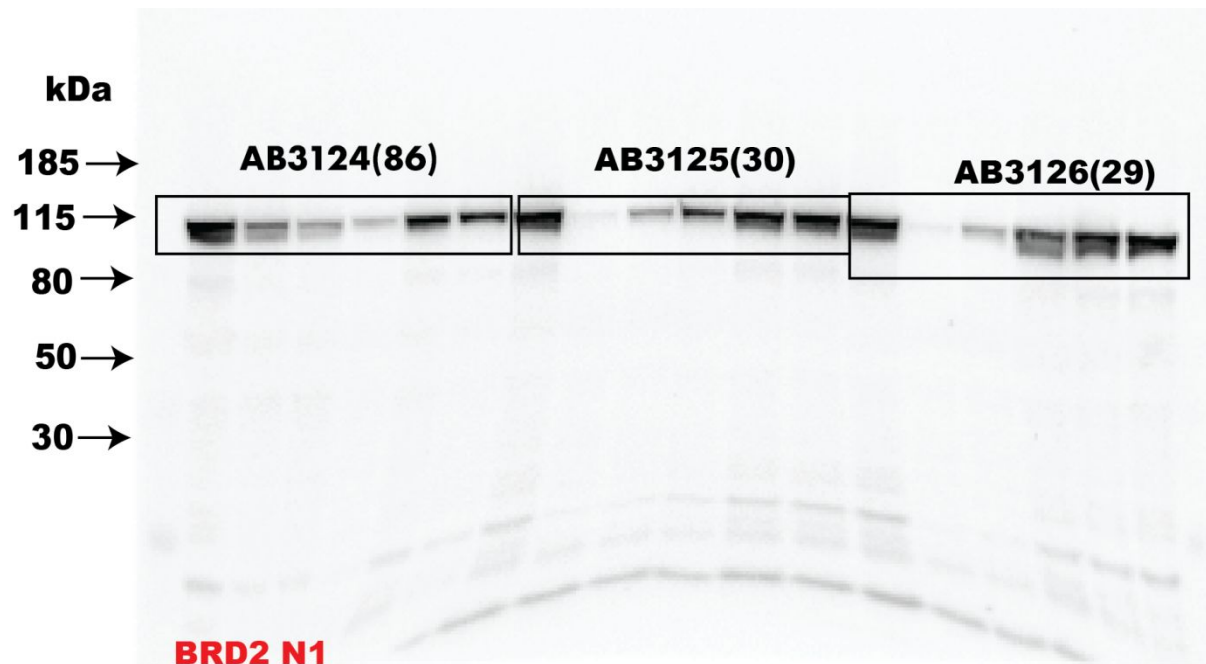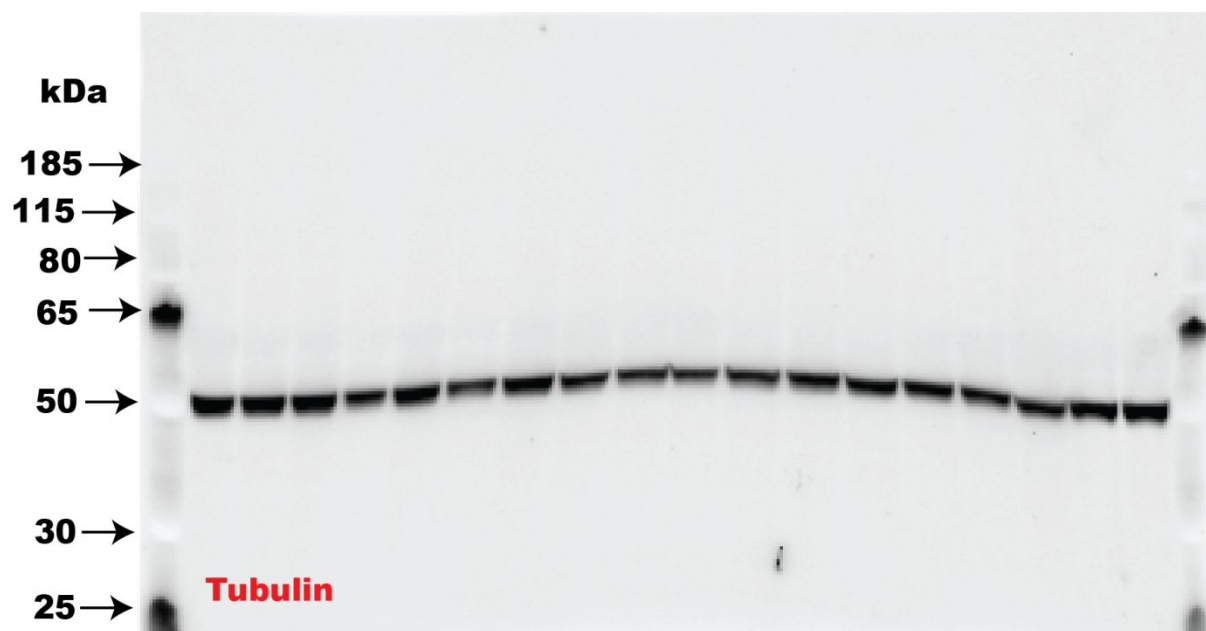

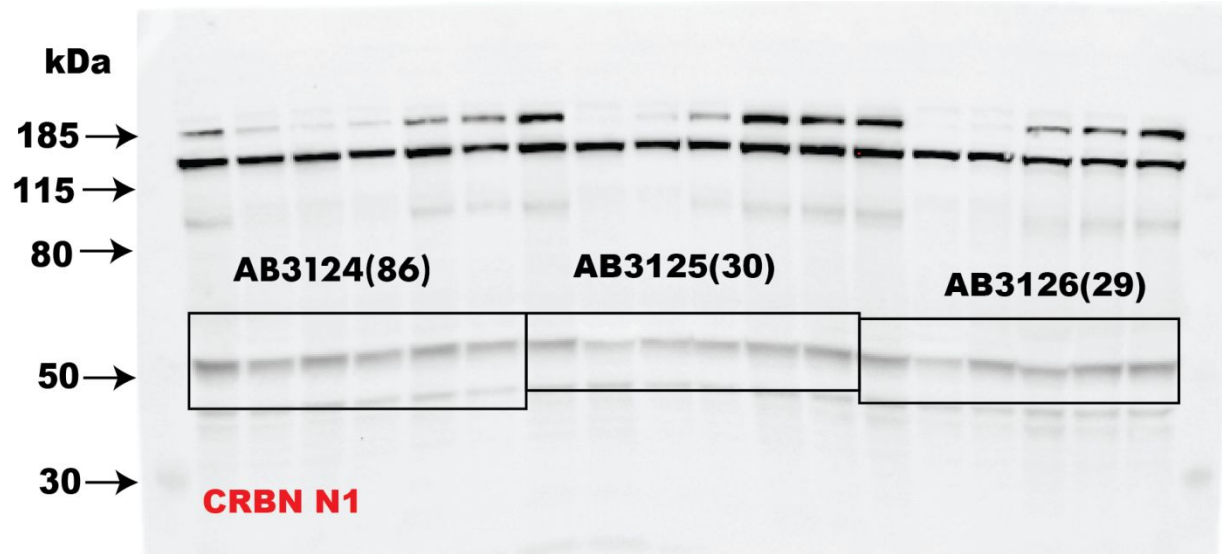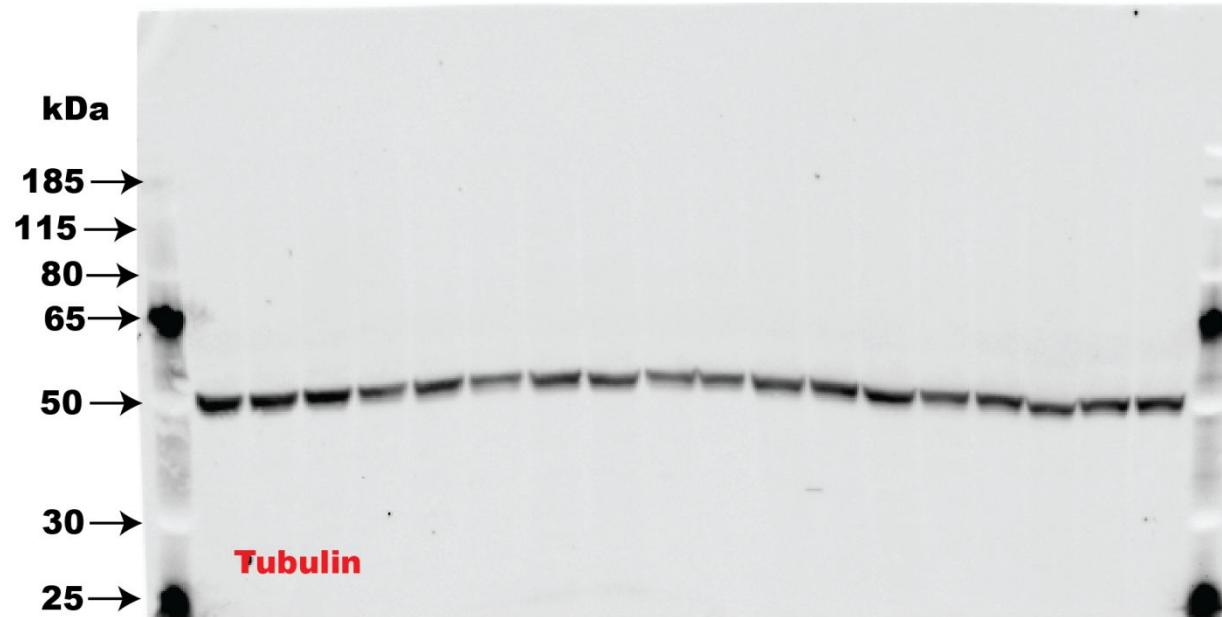



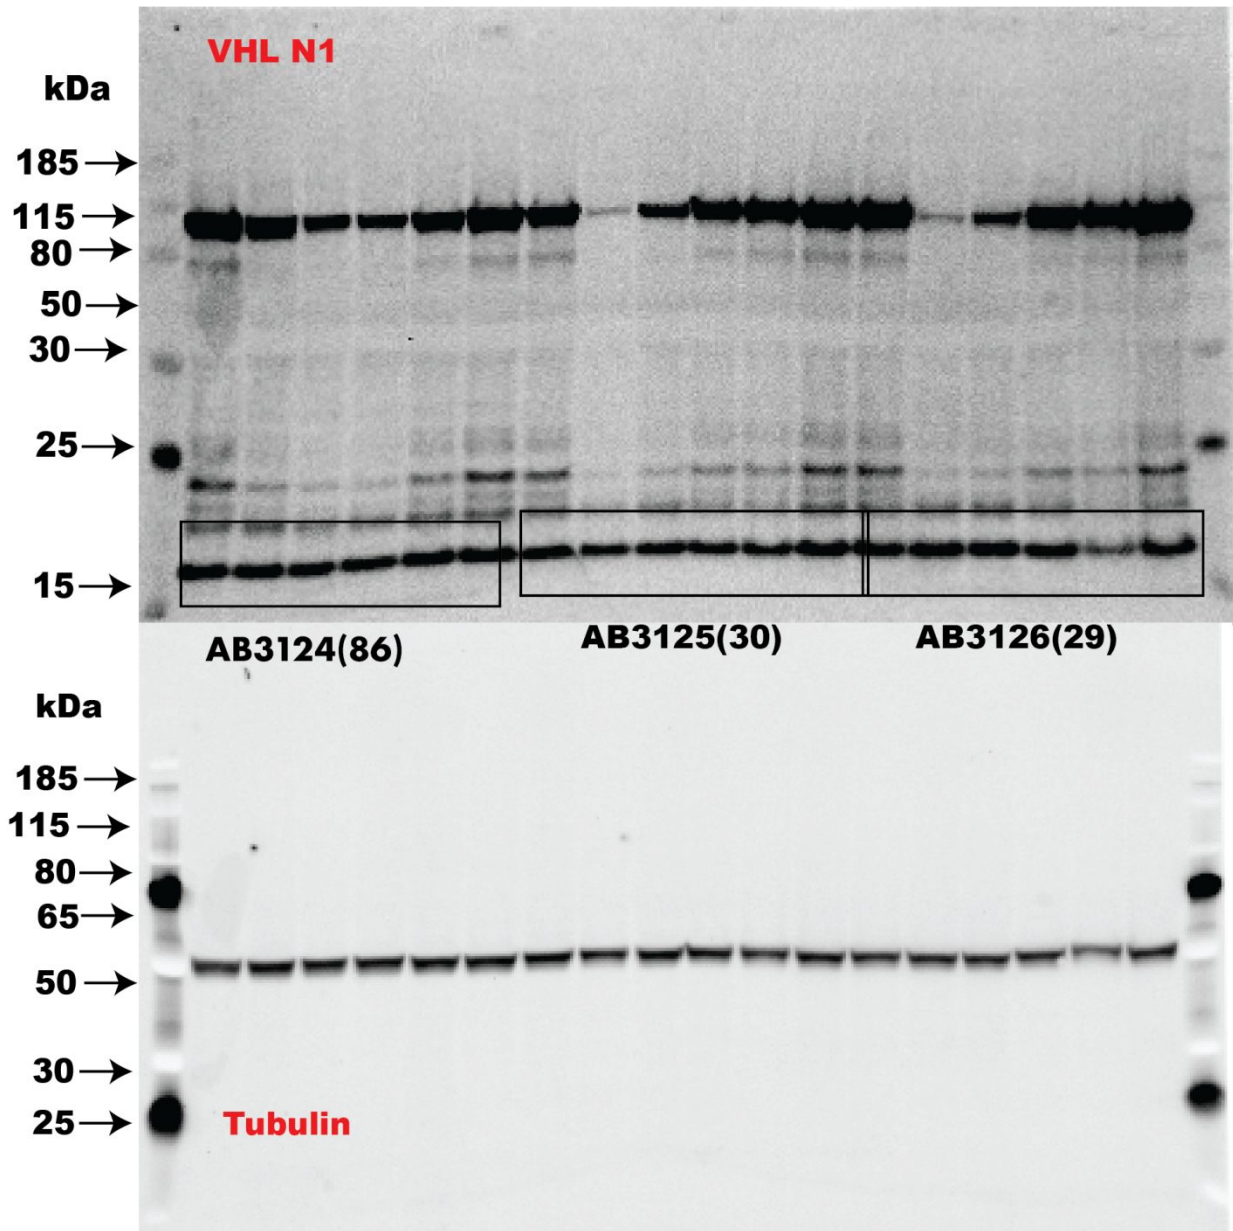

Supplementary Figure 9 (related to Figure 4). Uncropped independent replicate western blotting images of the evaluation of heterotrivalent PROTACs 23 – 32 & 86 in HEK293 cells.

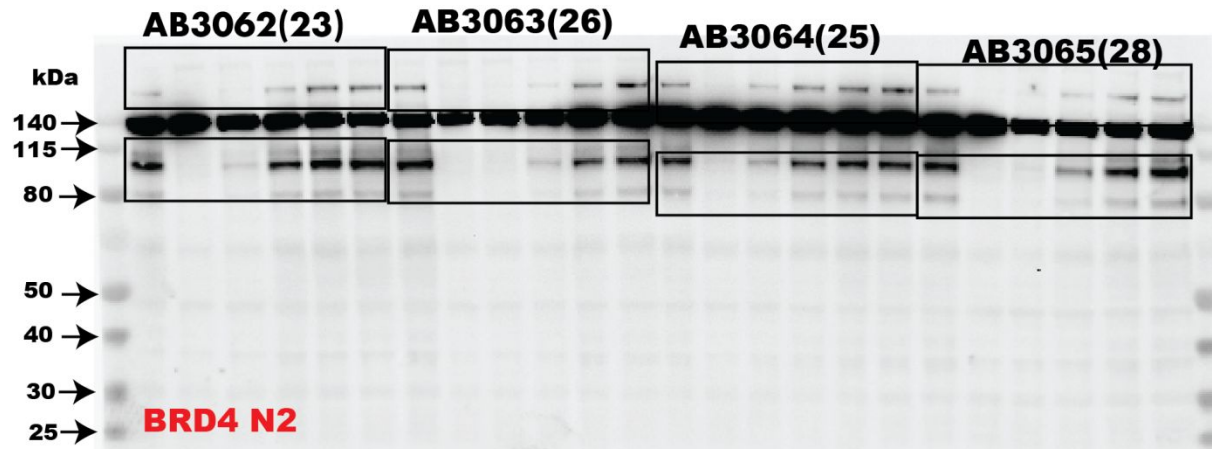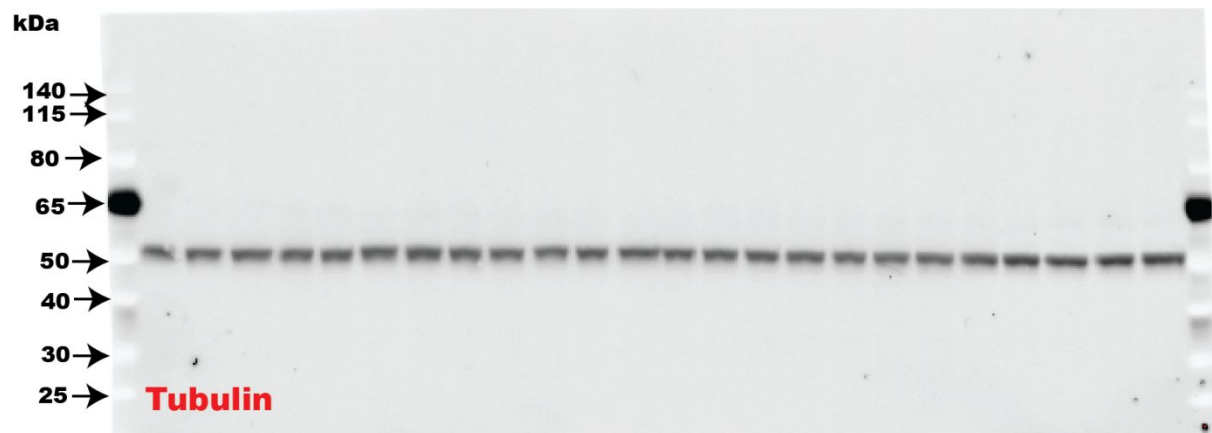

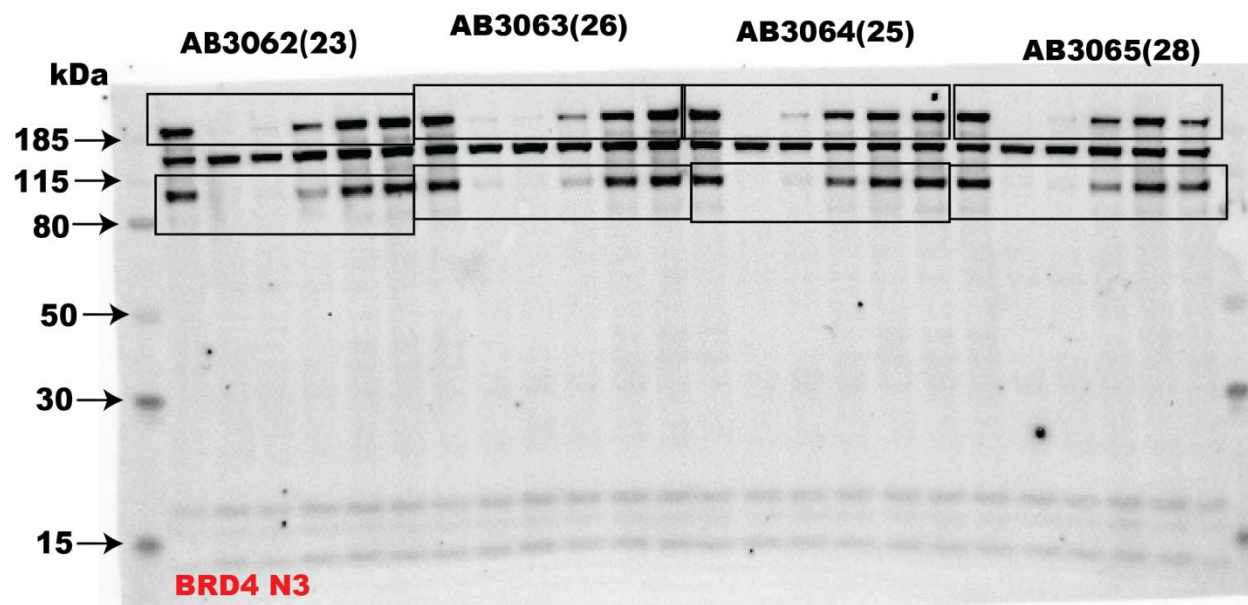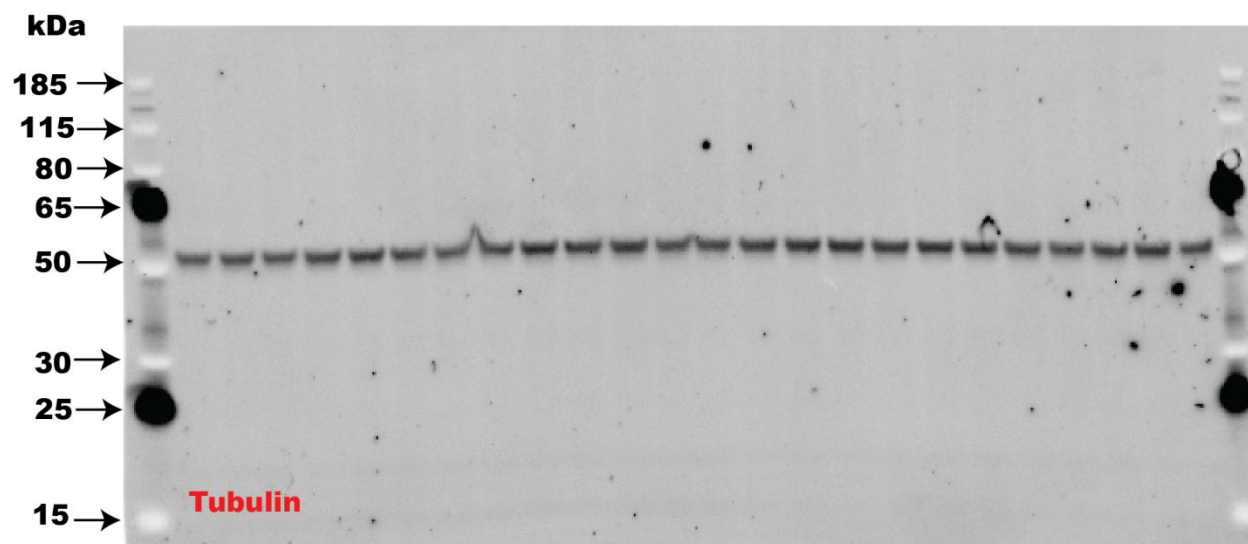



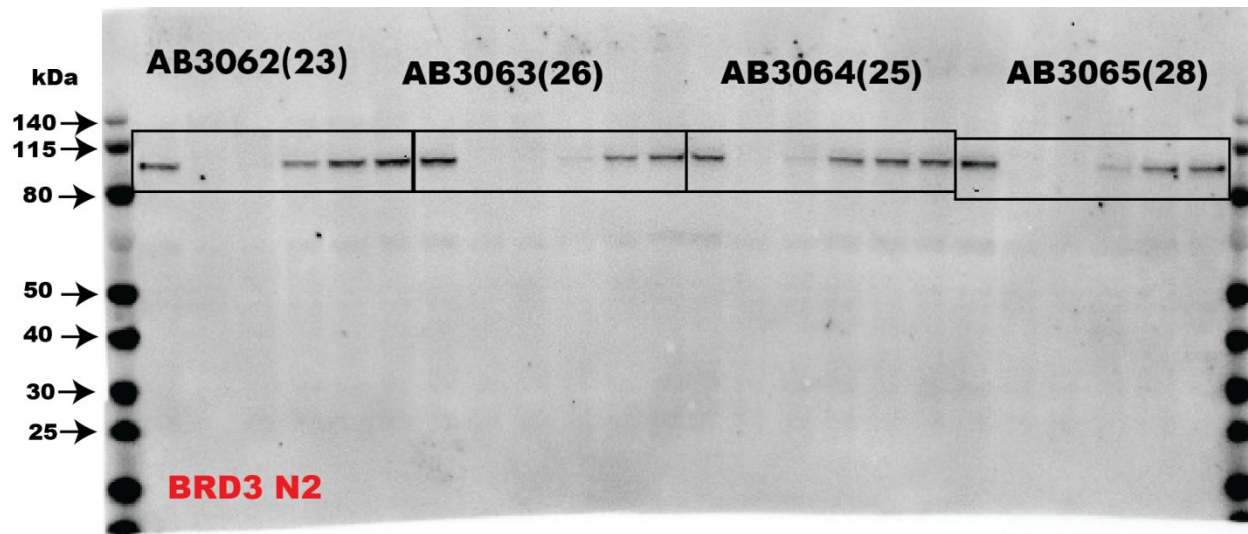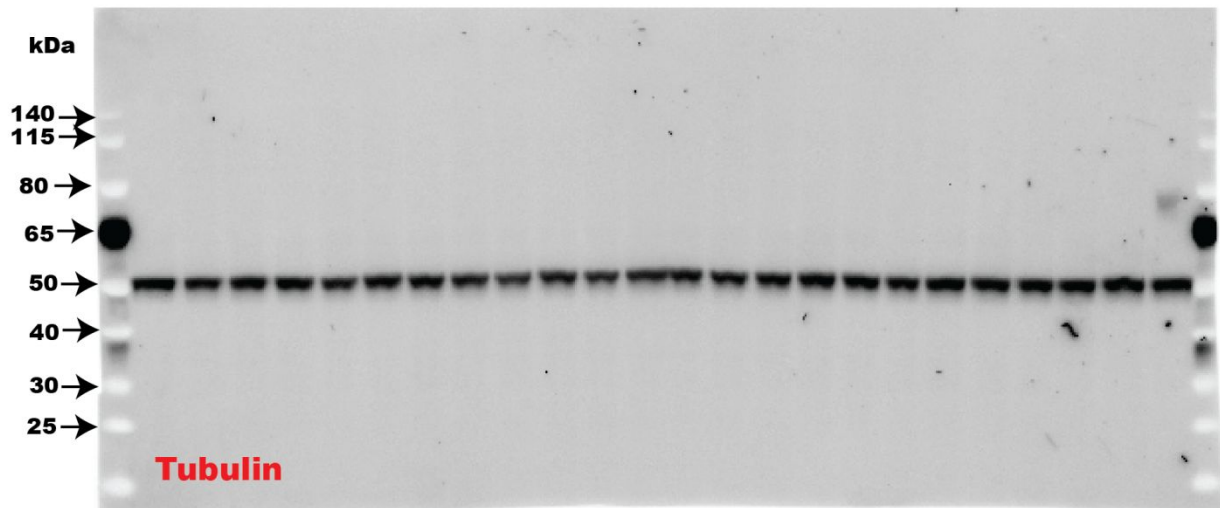

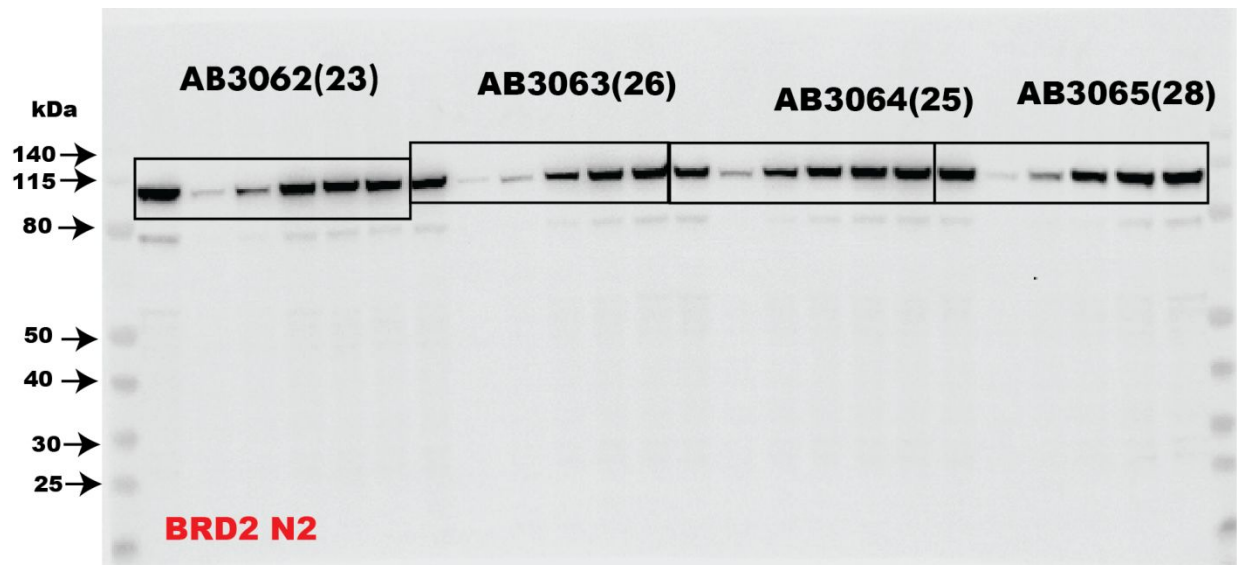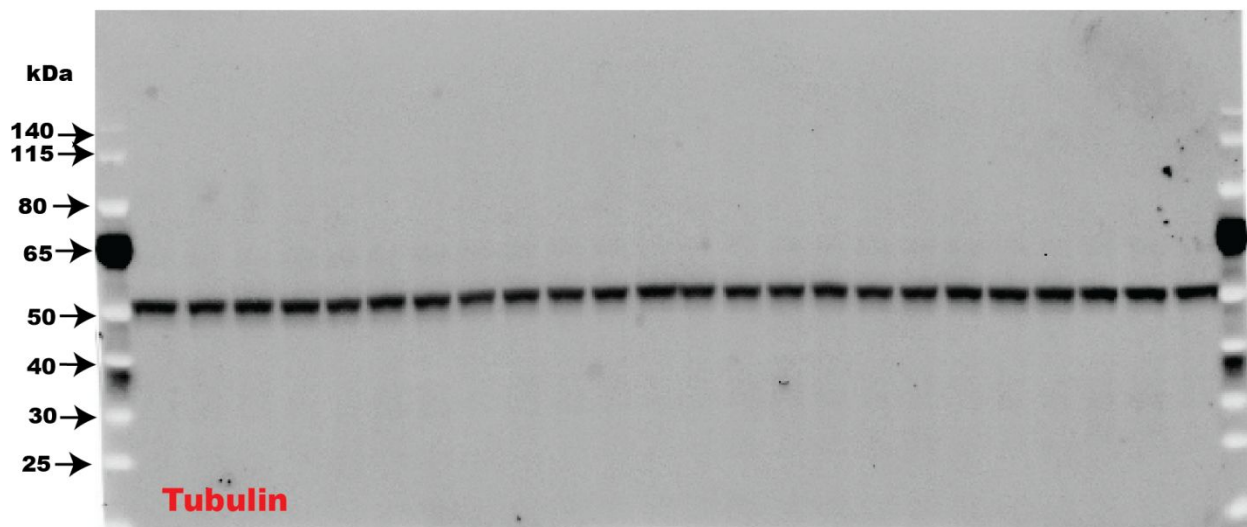

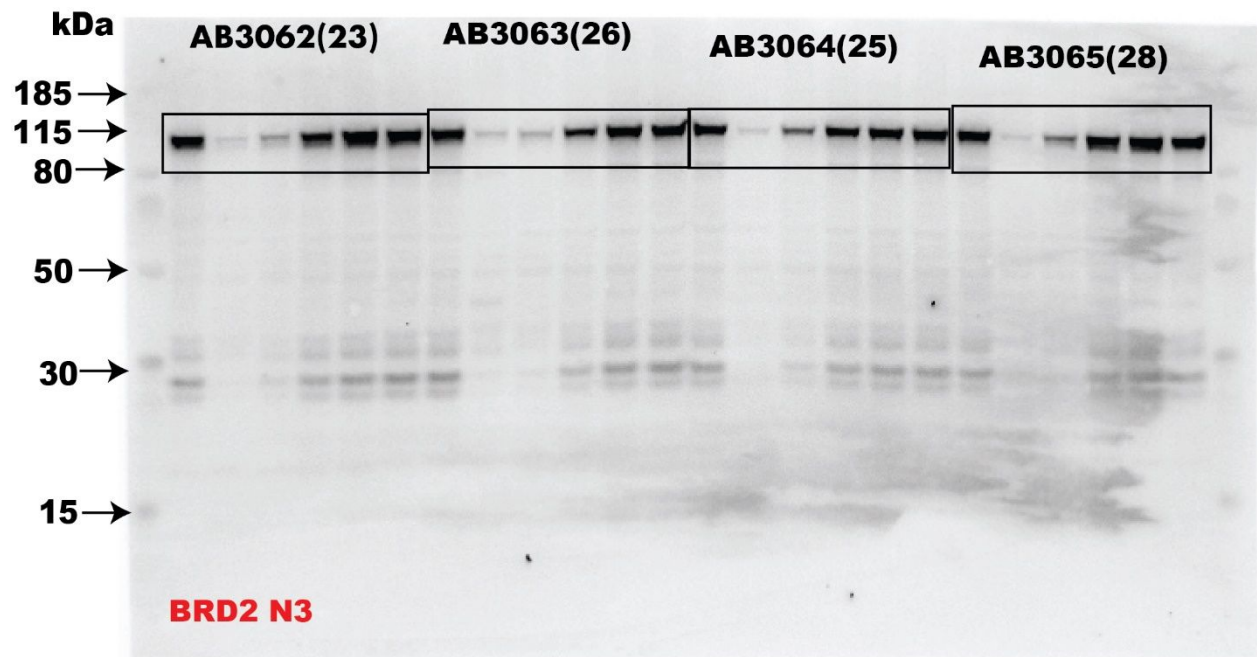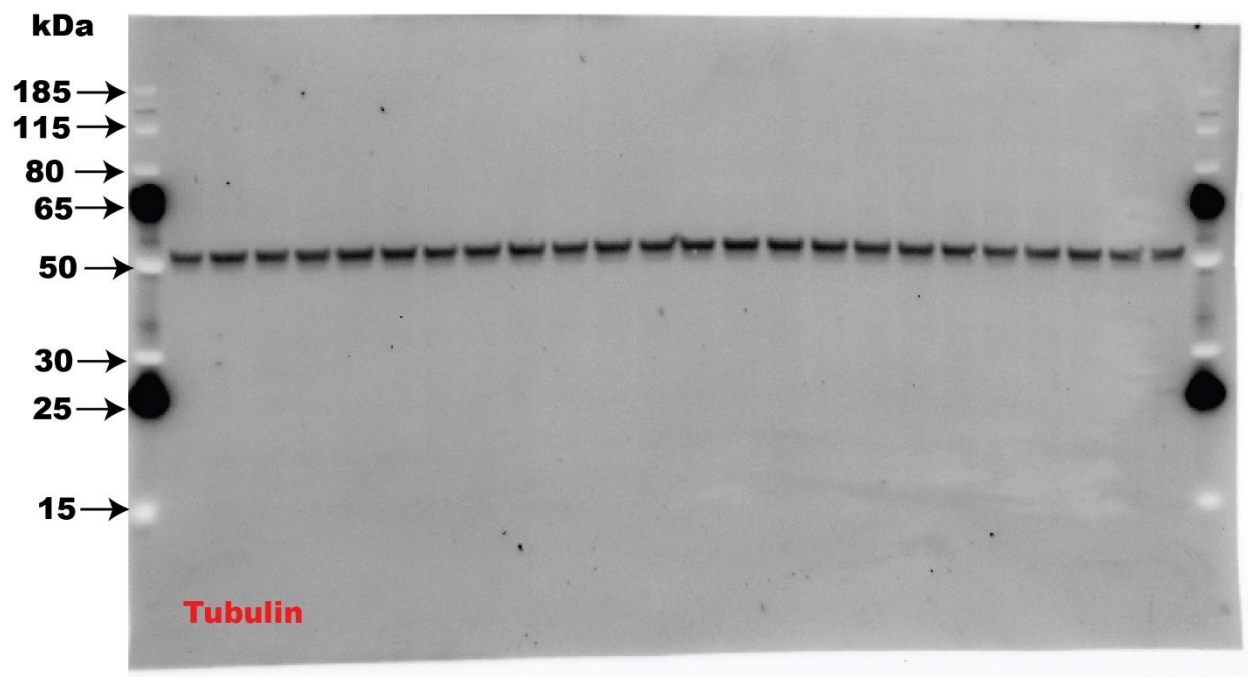

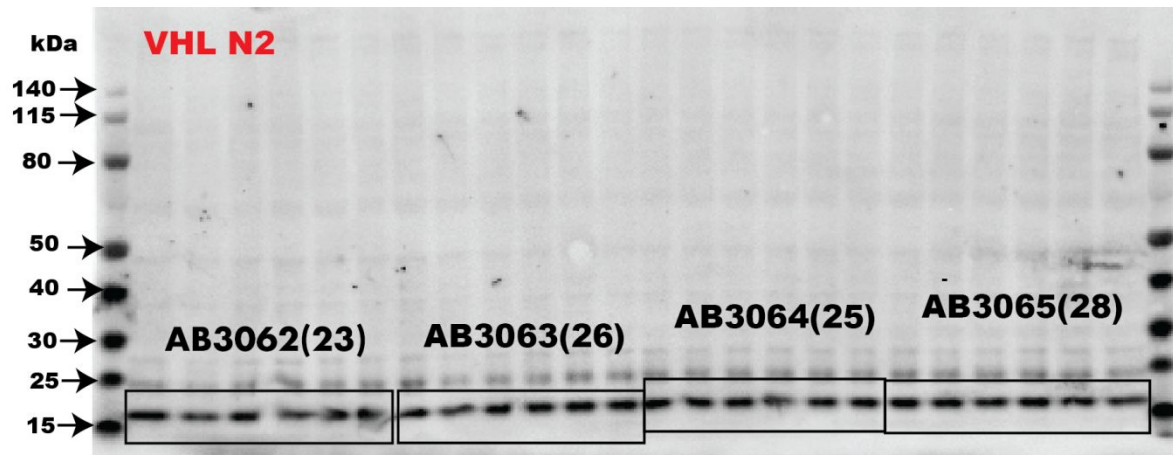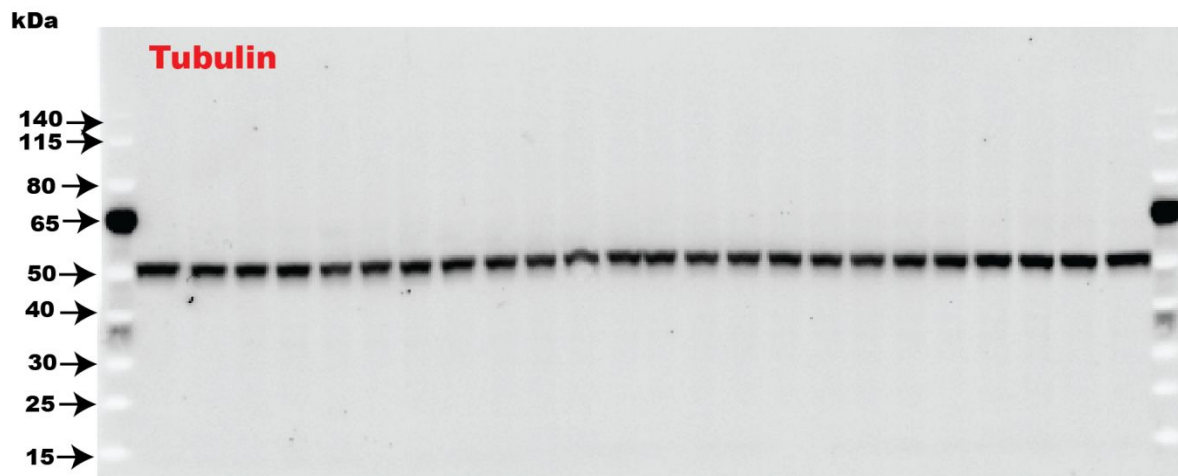

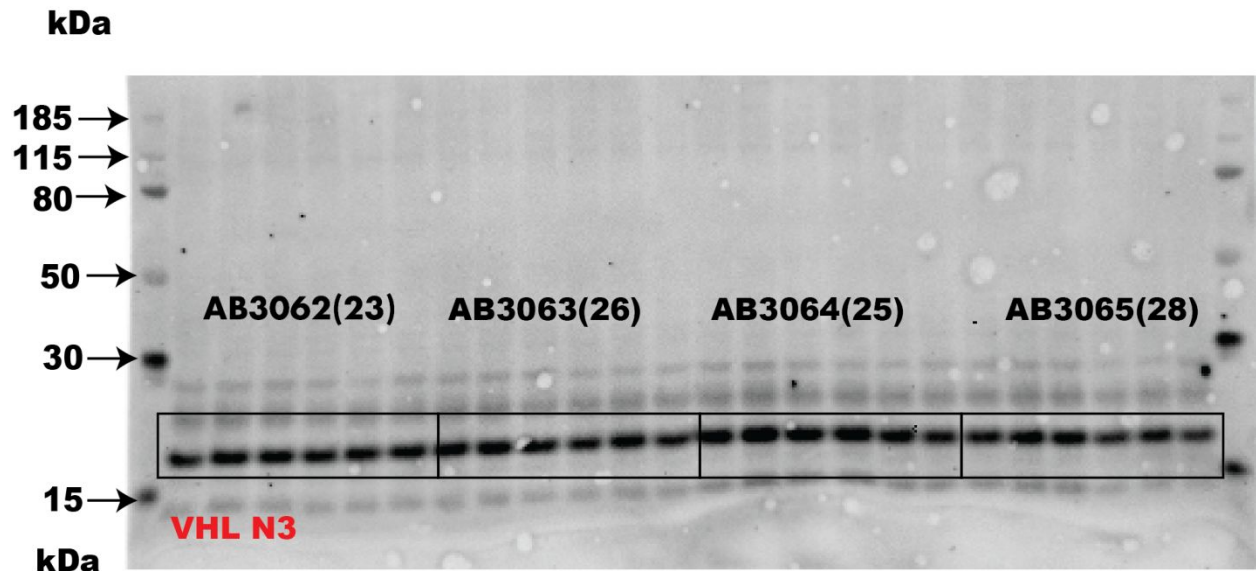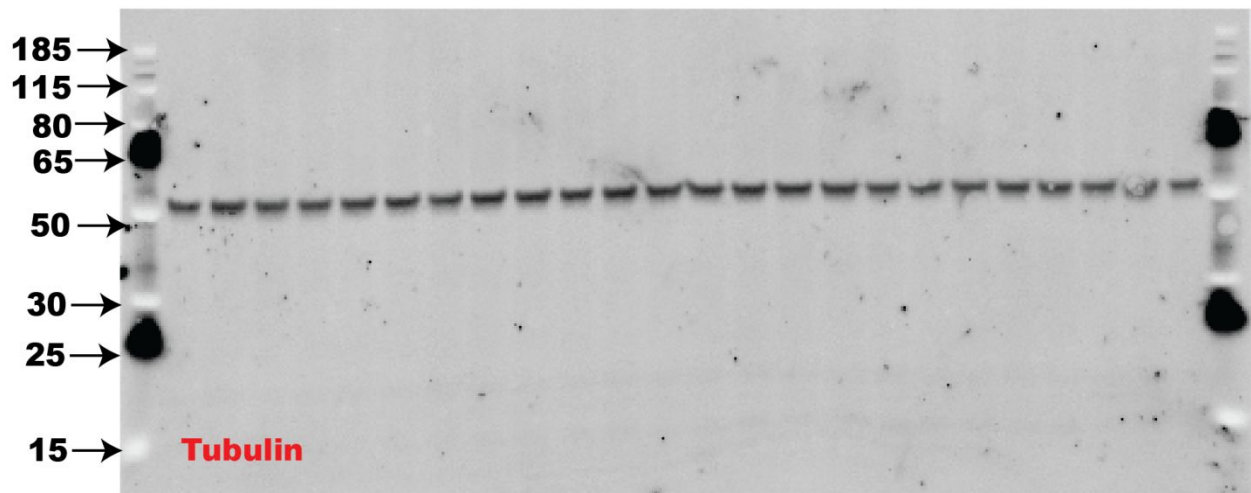



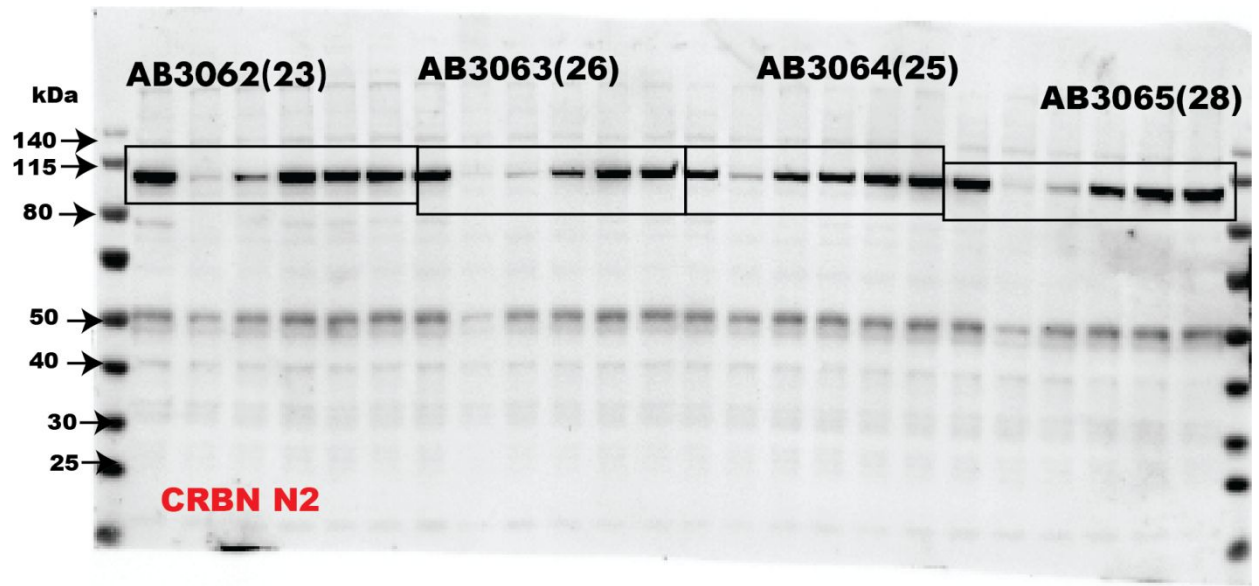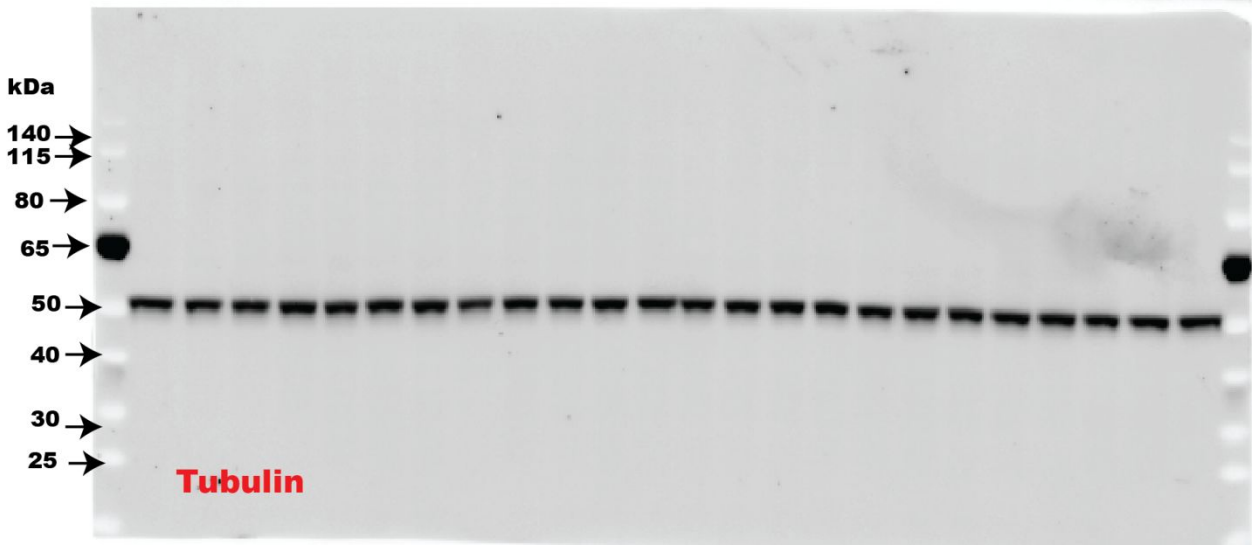

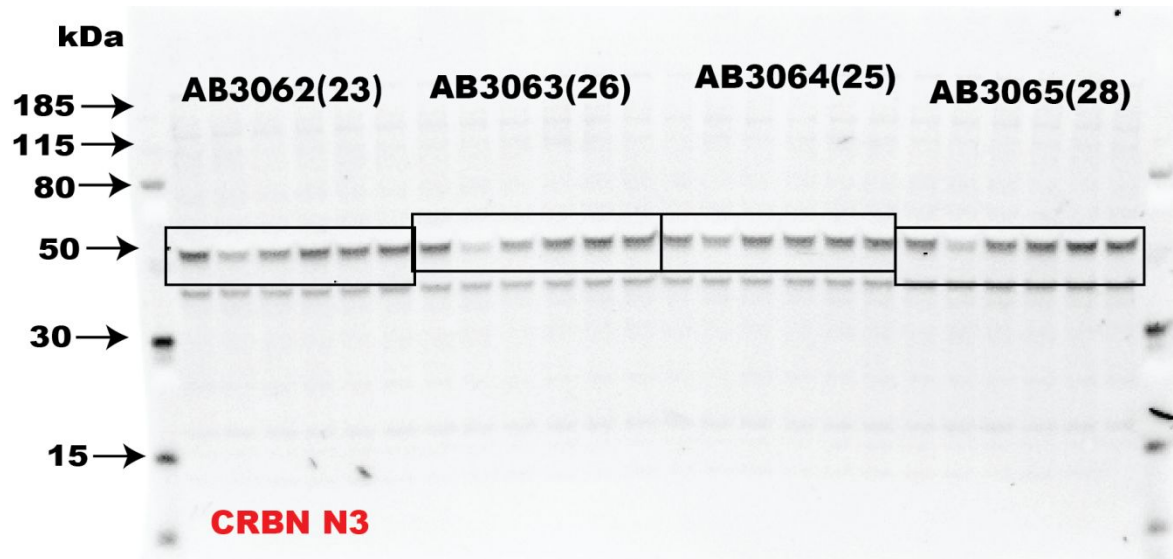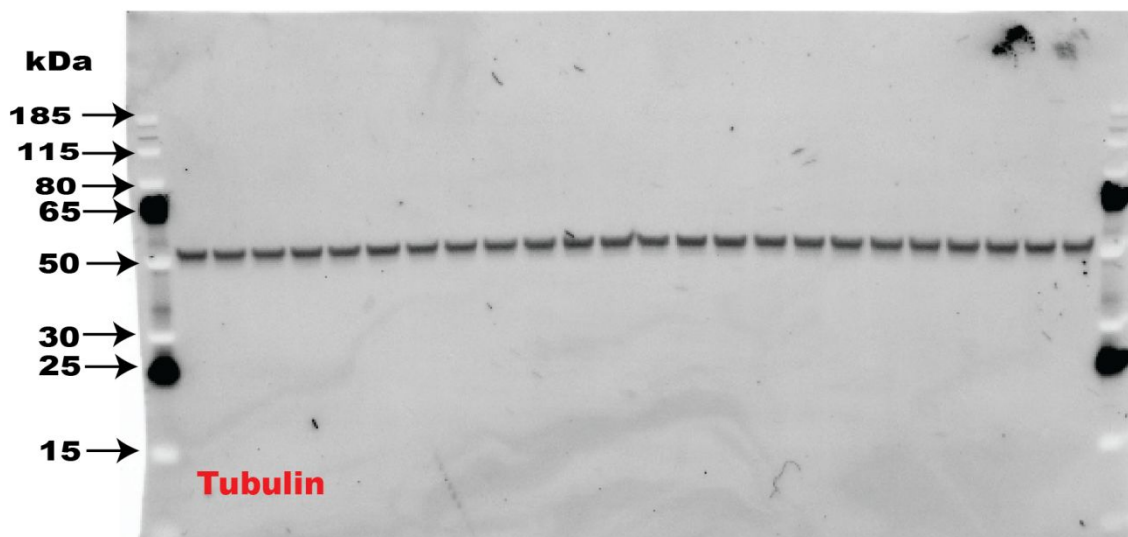

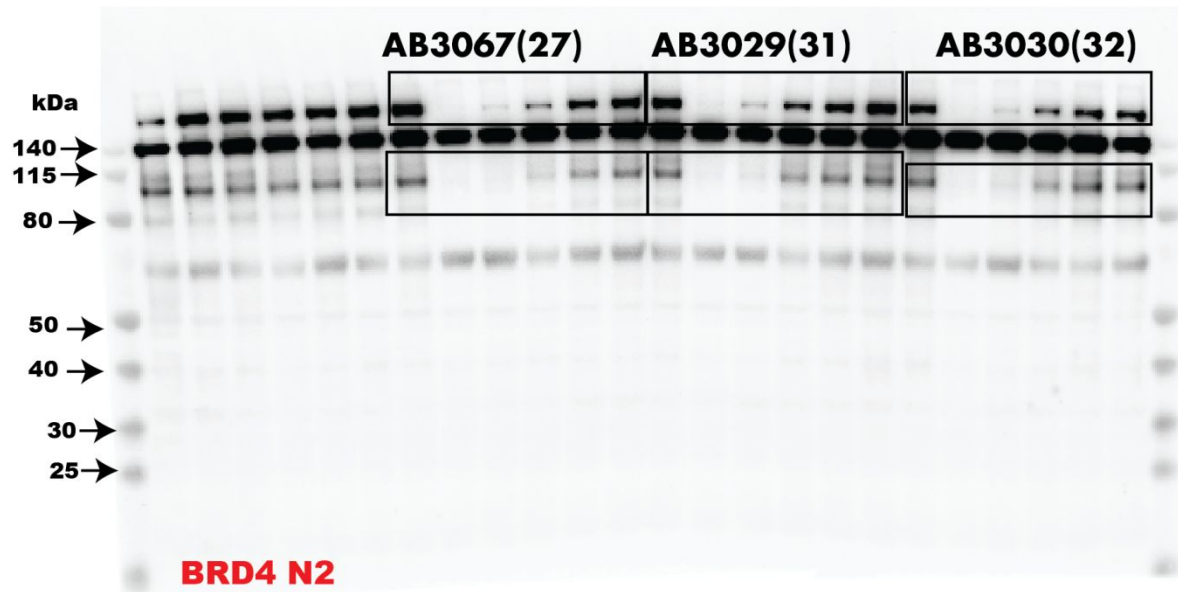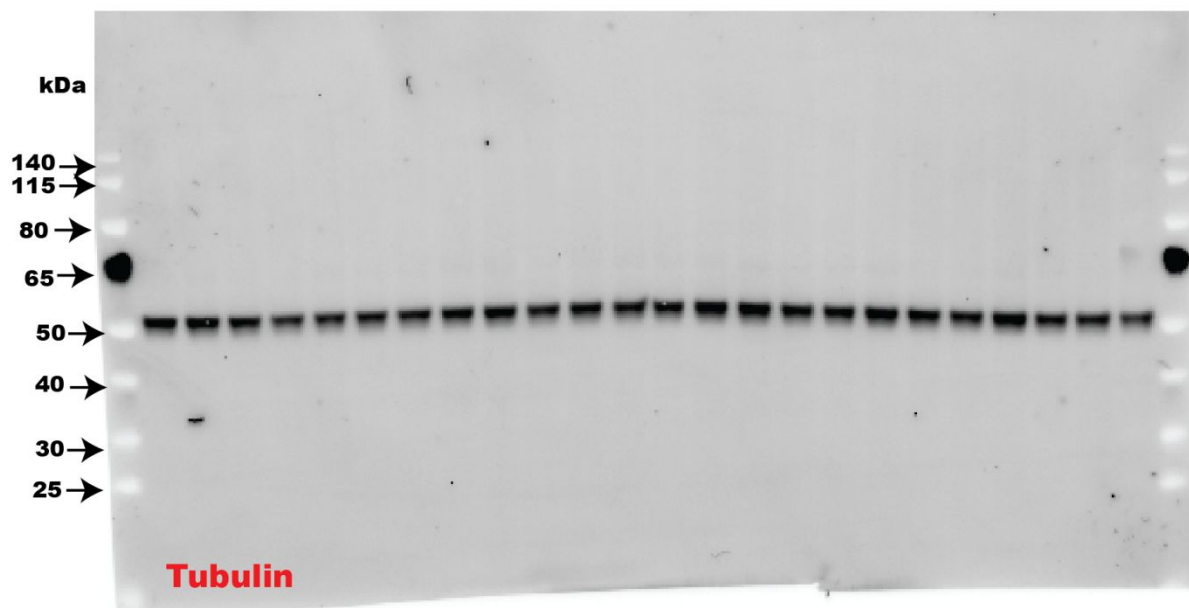



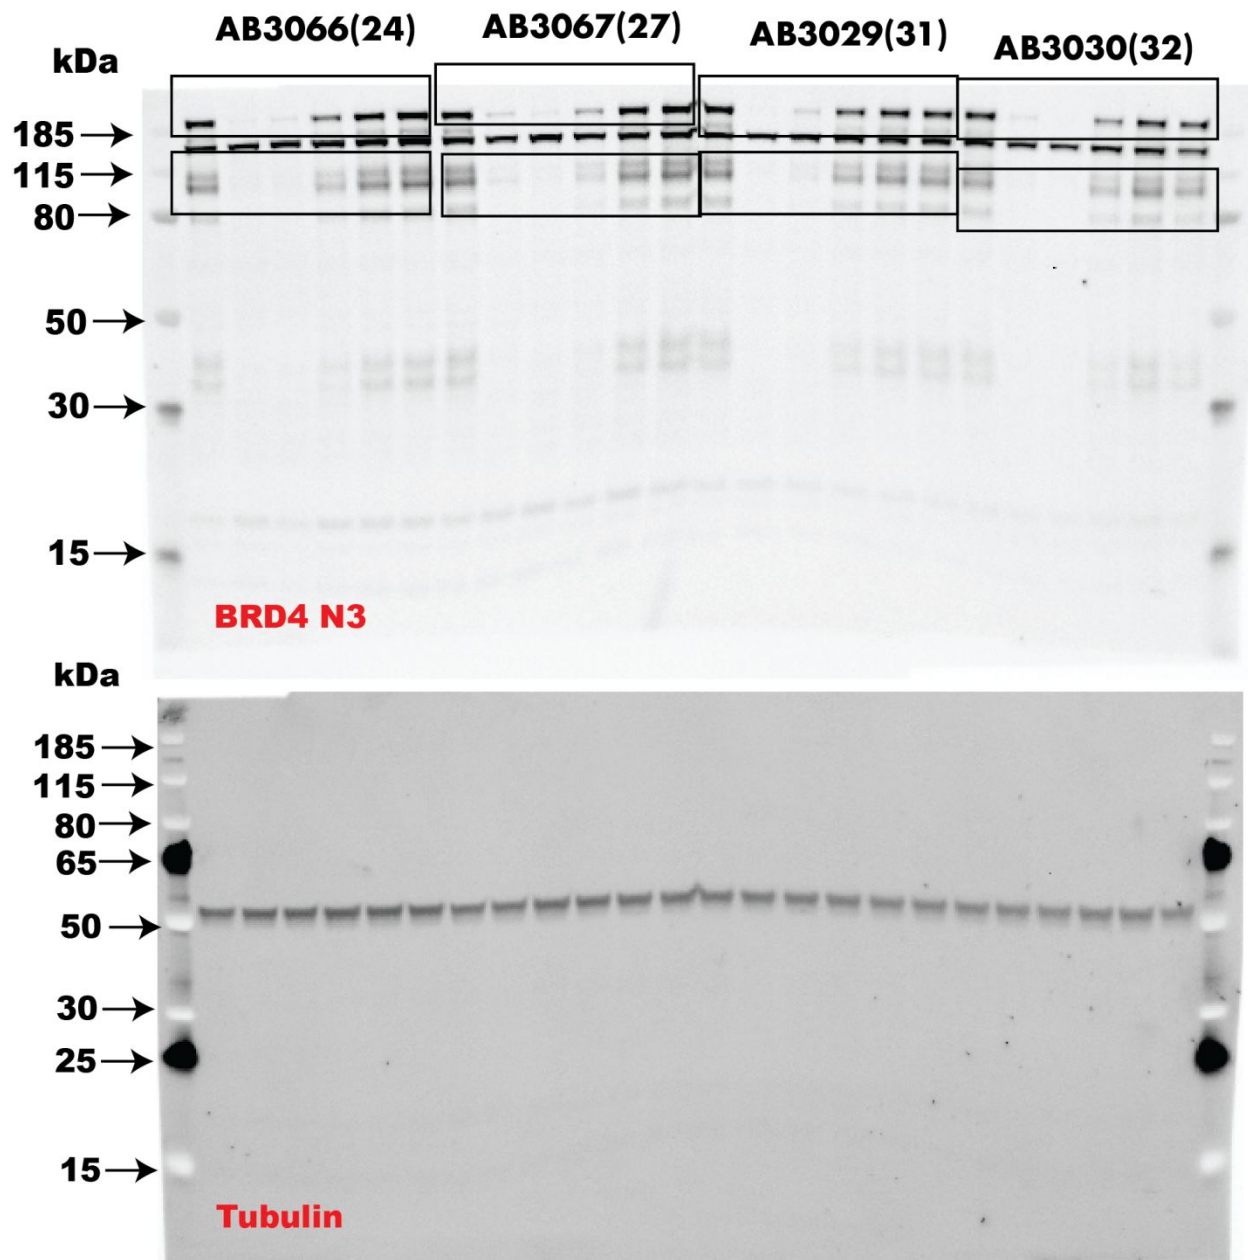

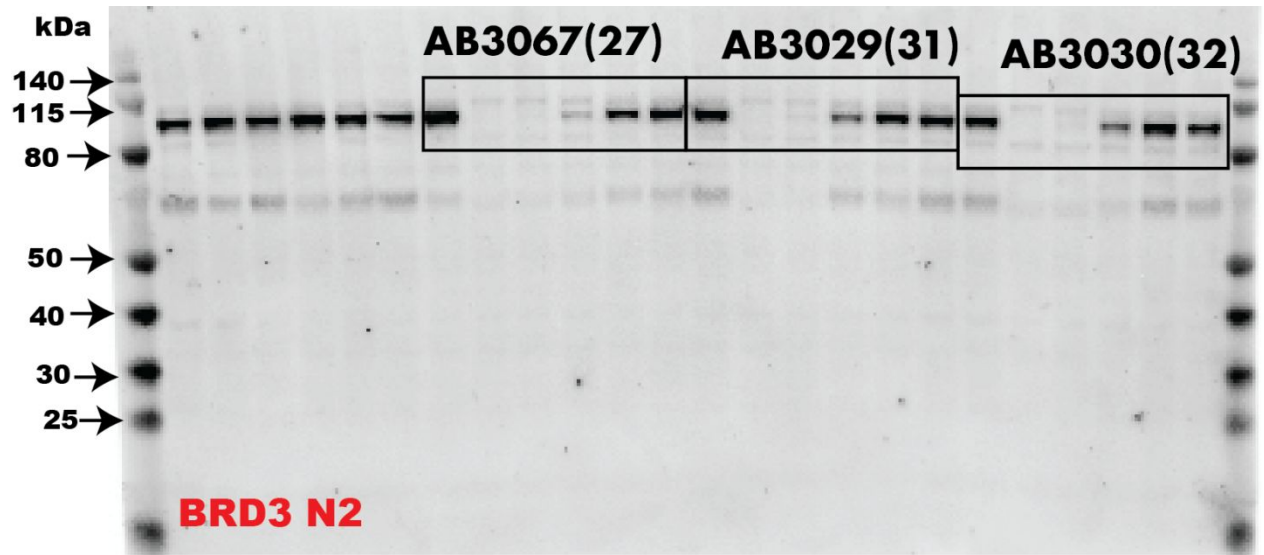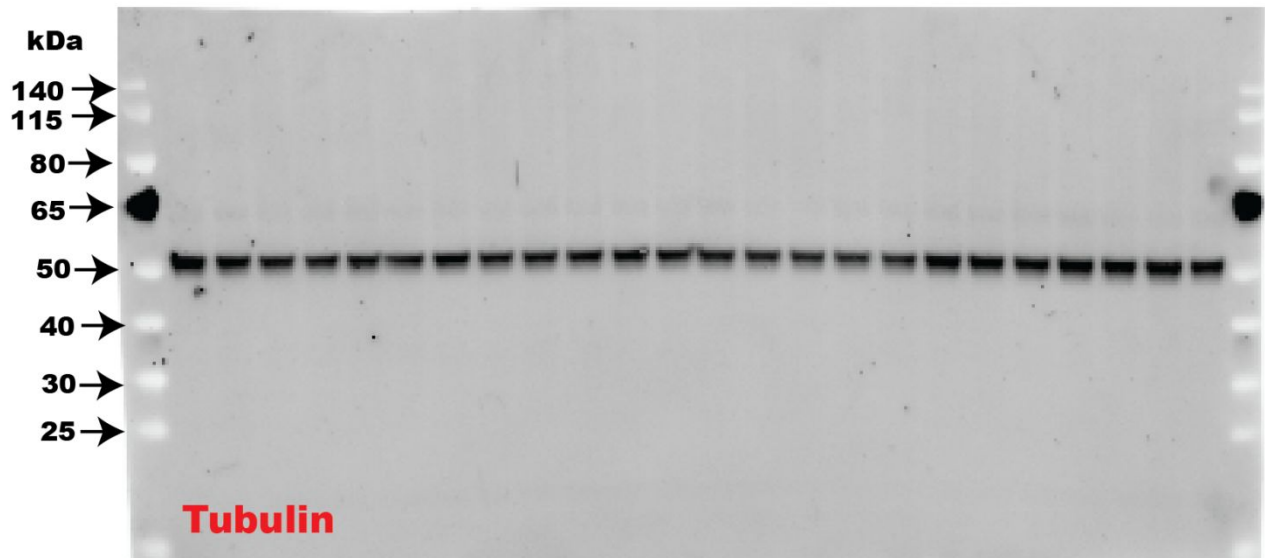

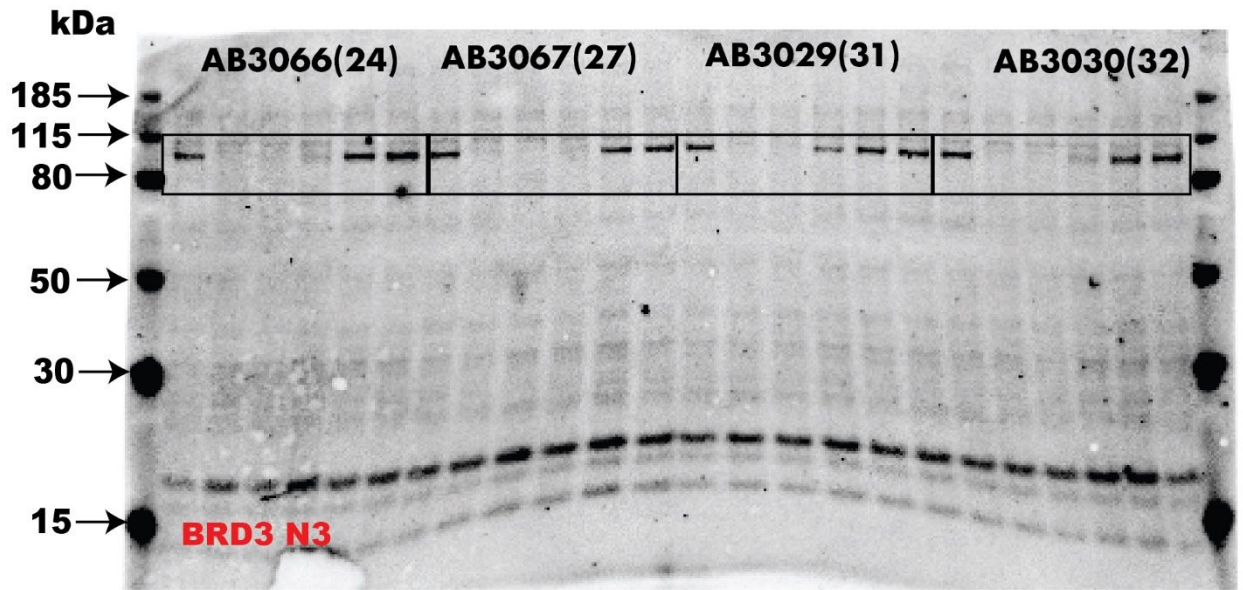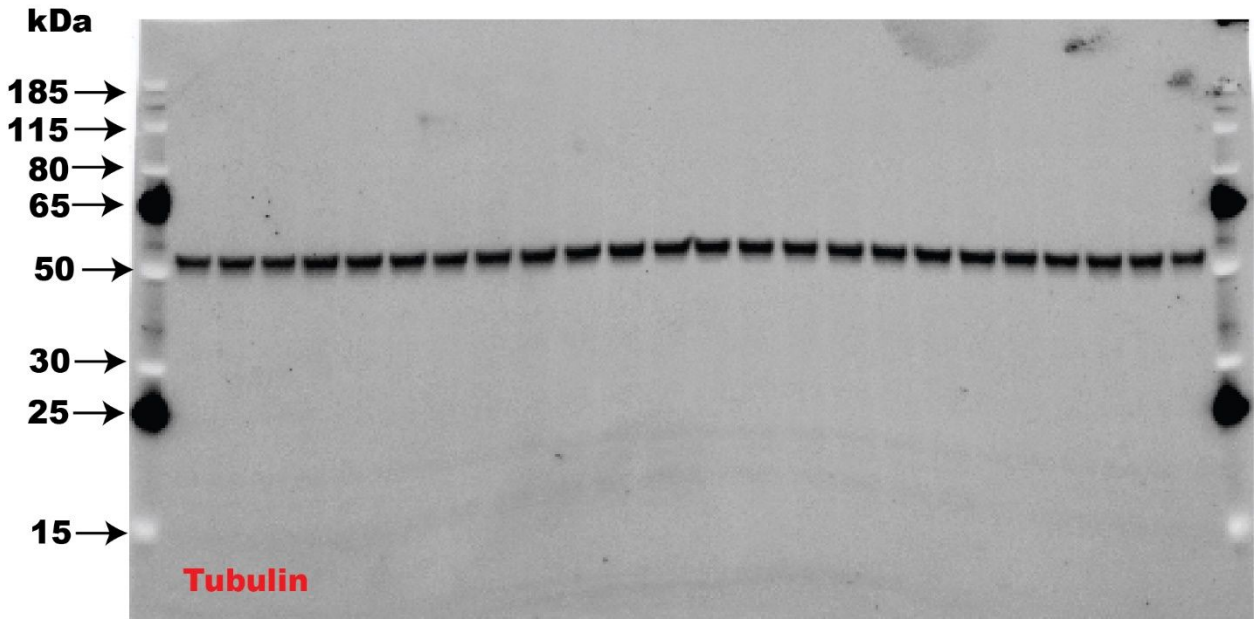

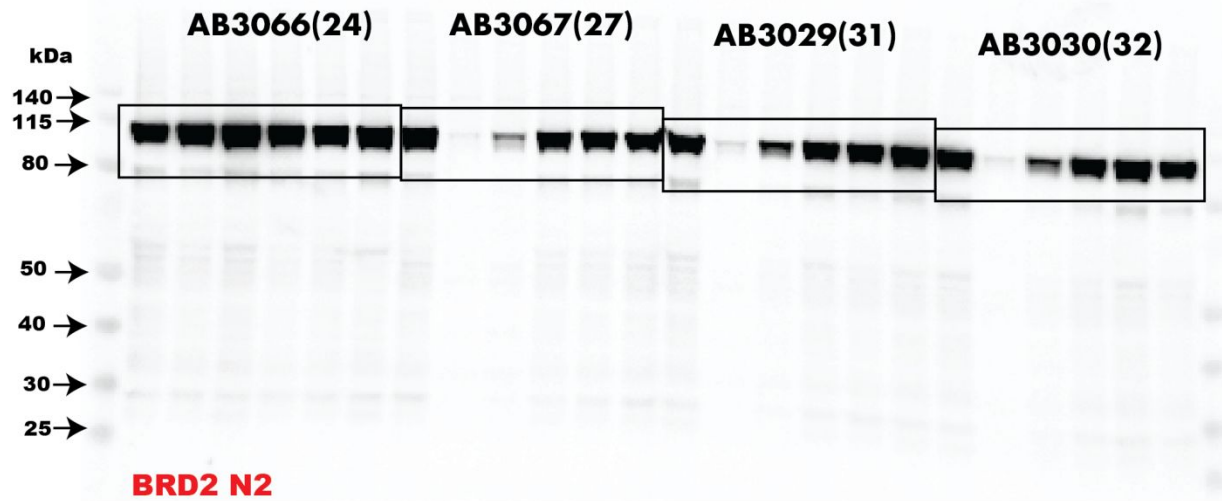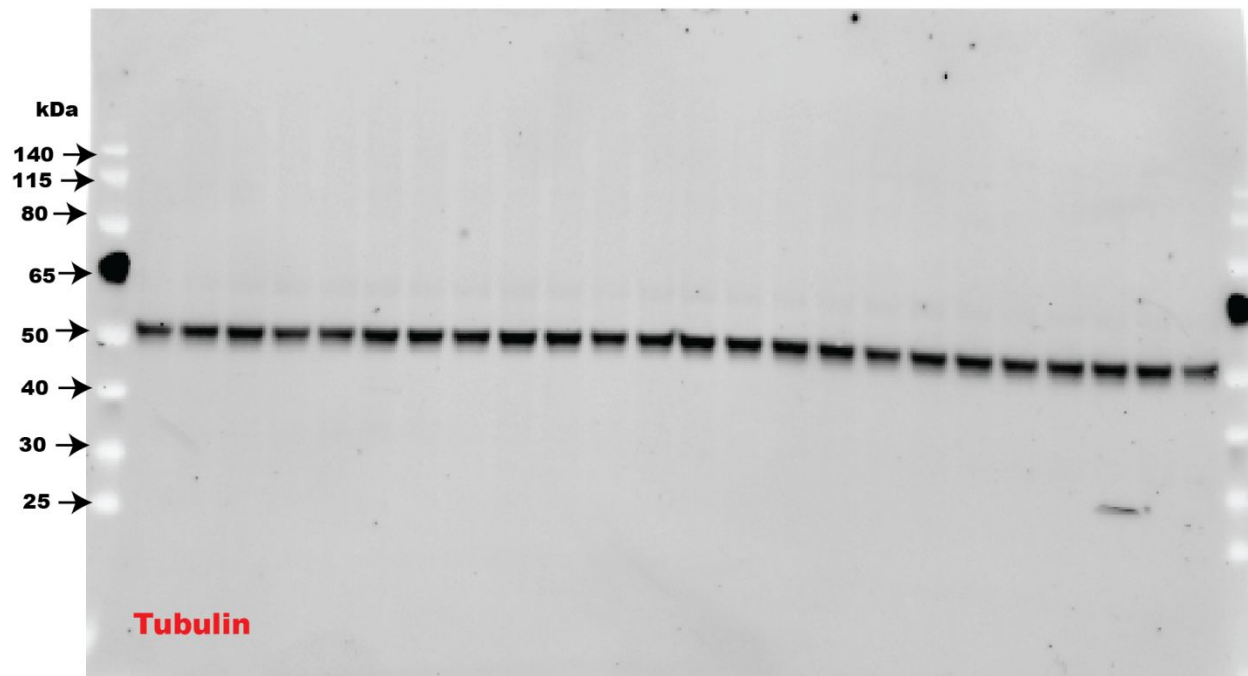



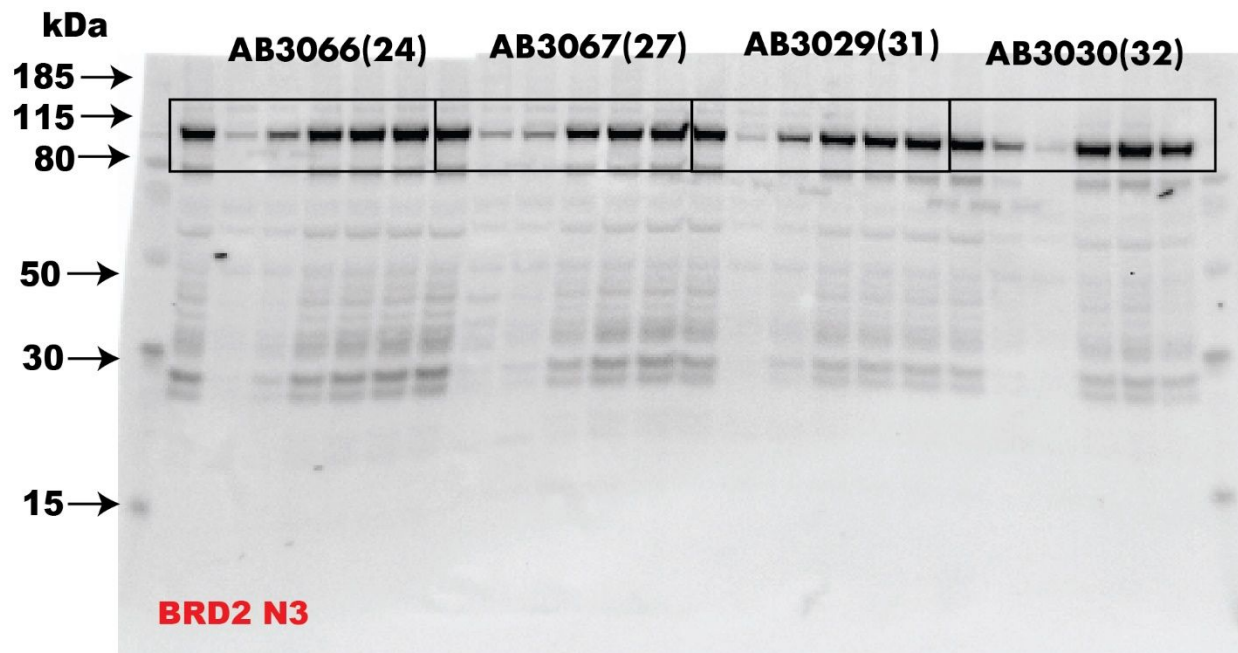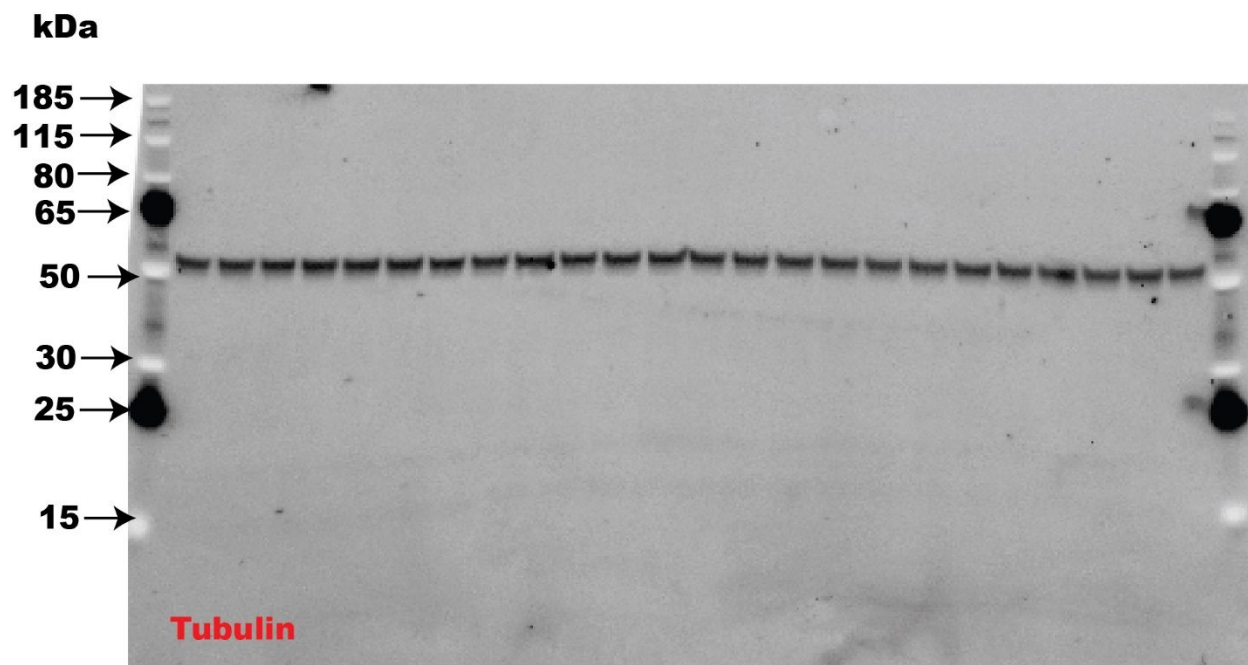

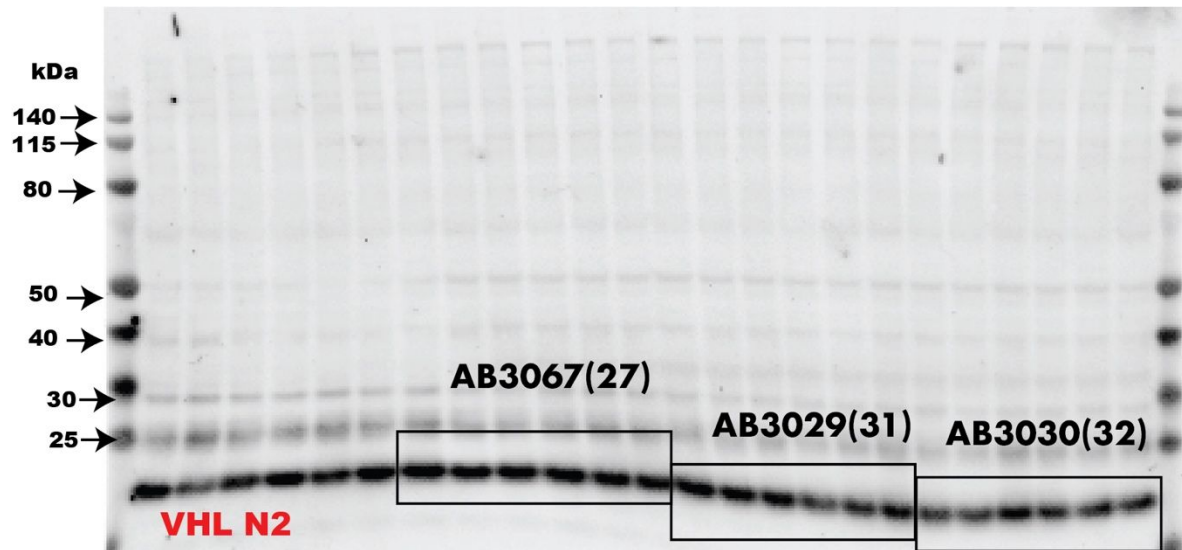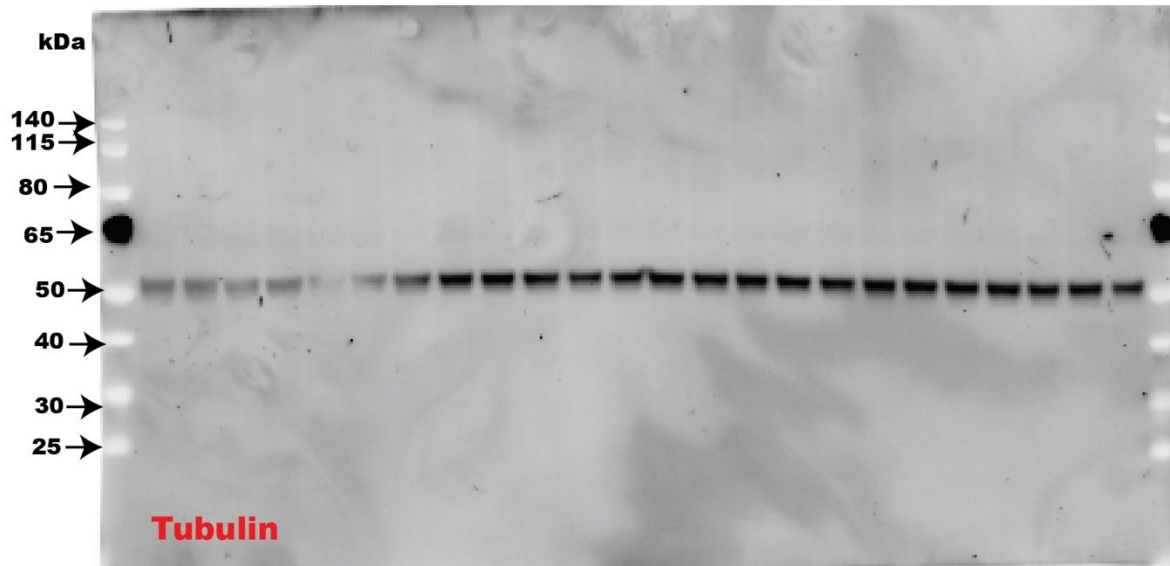



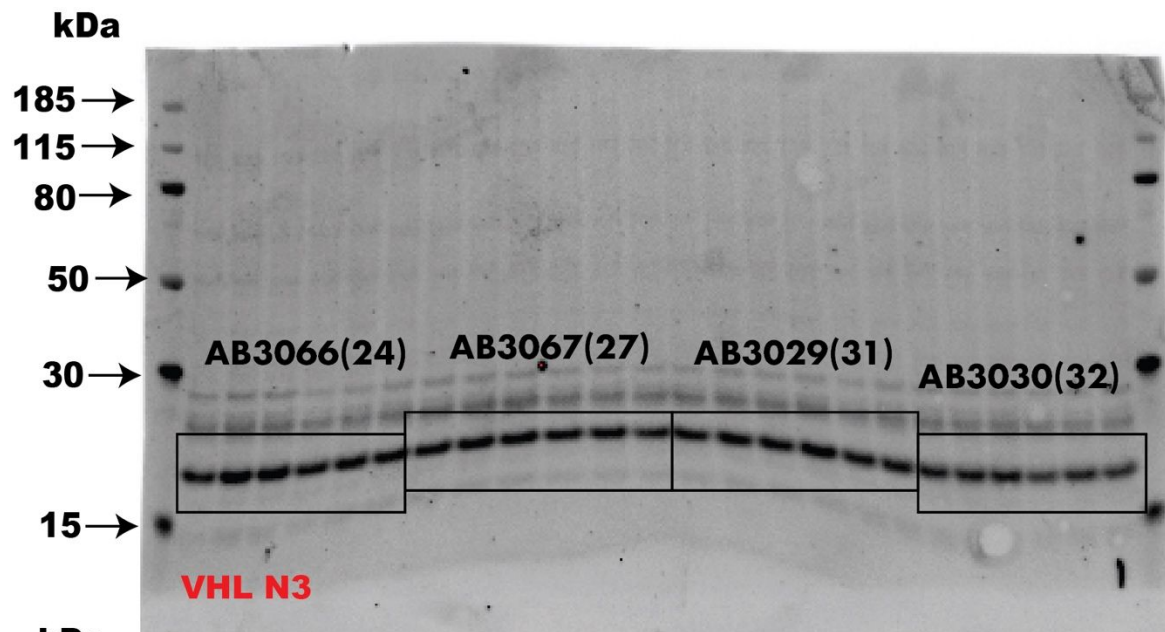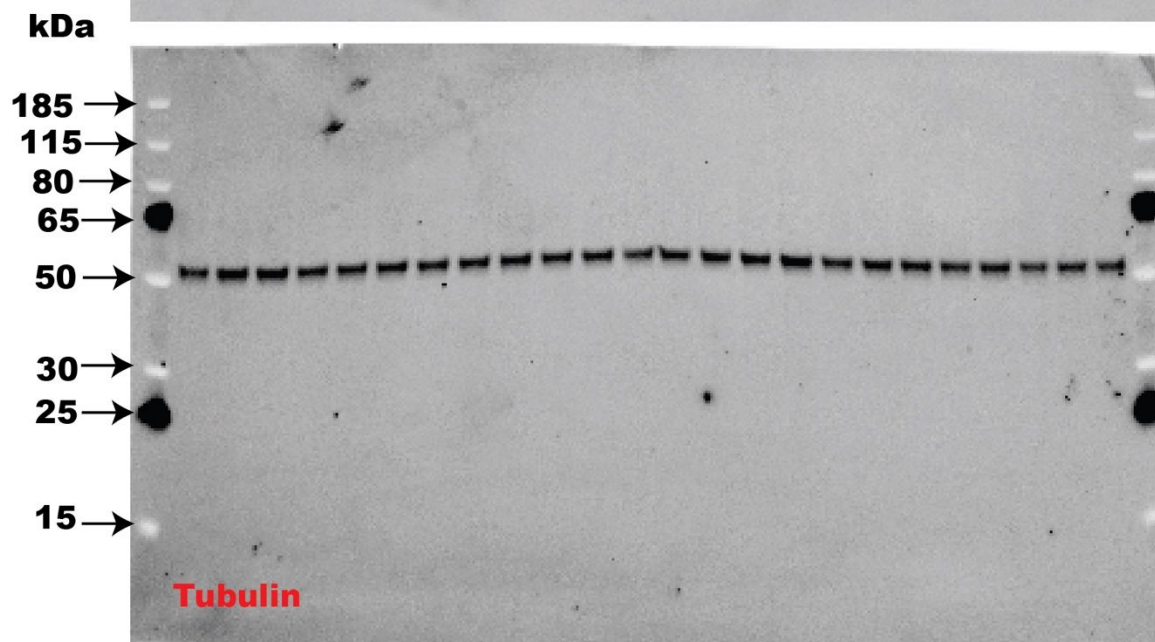

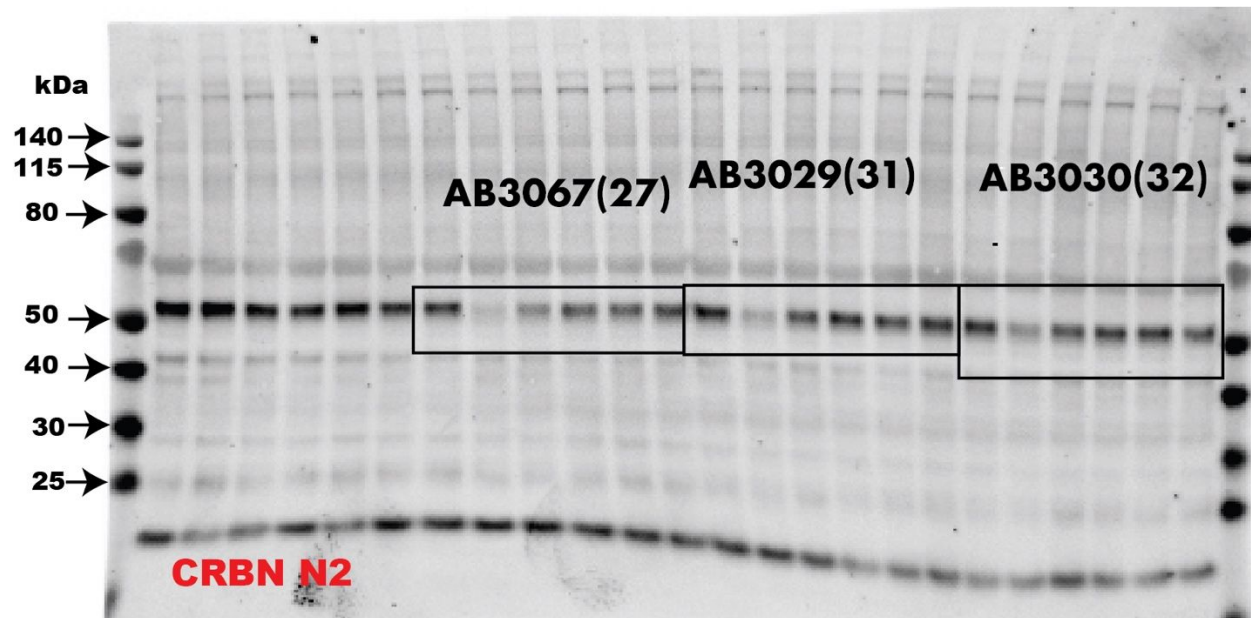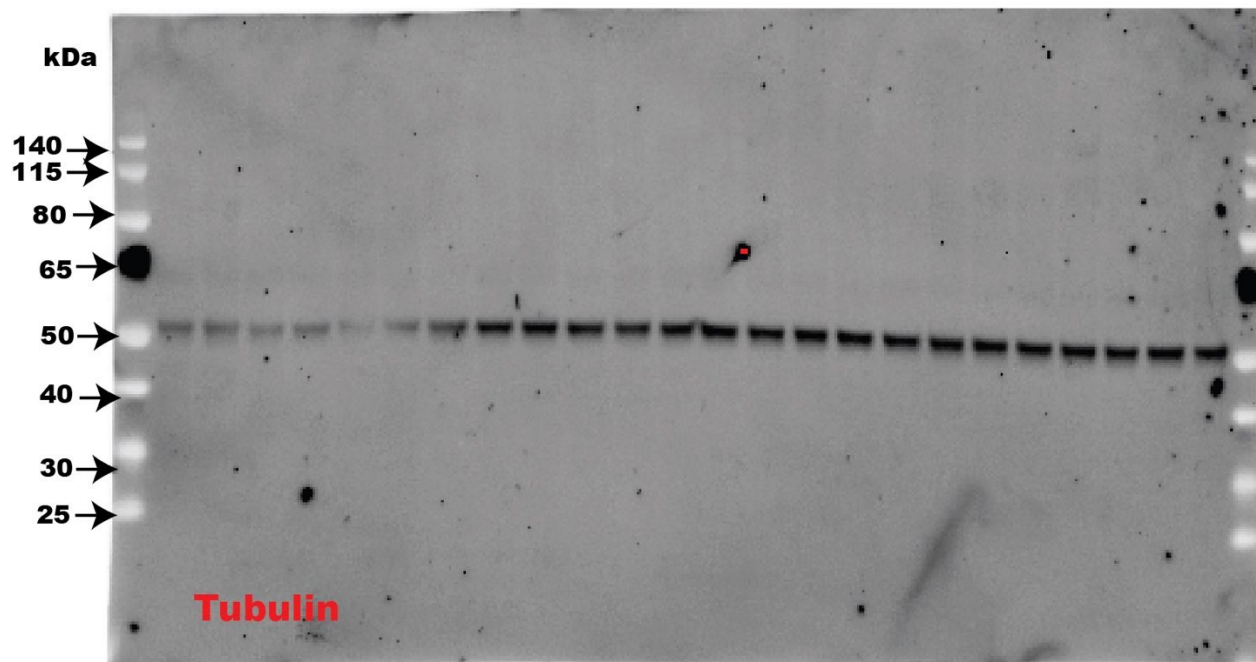

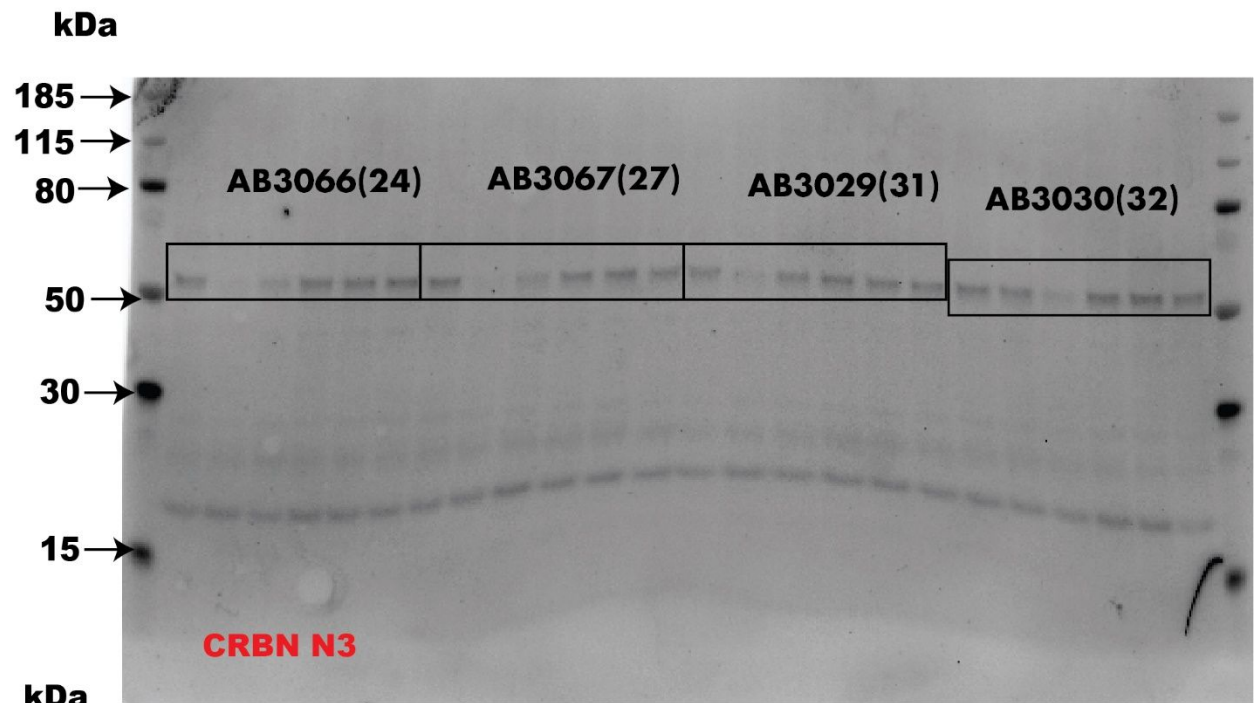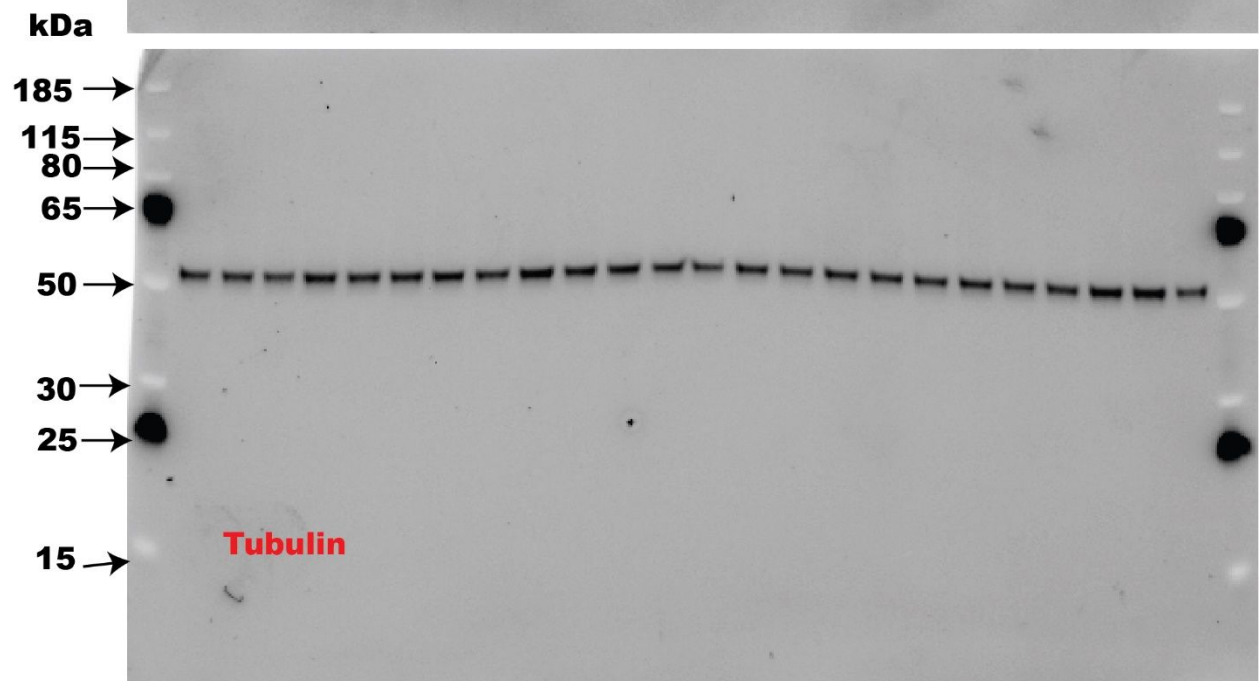

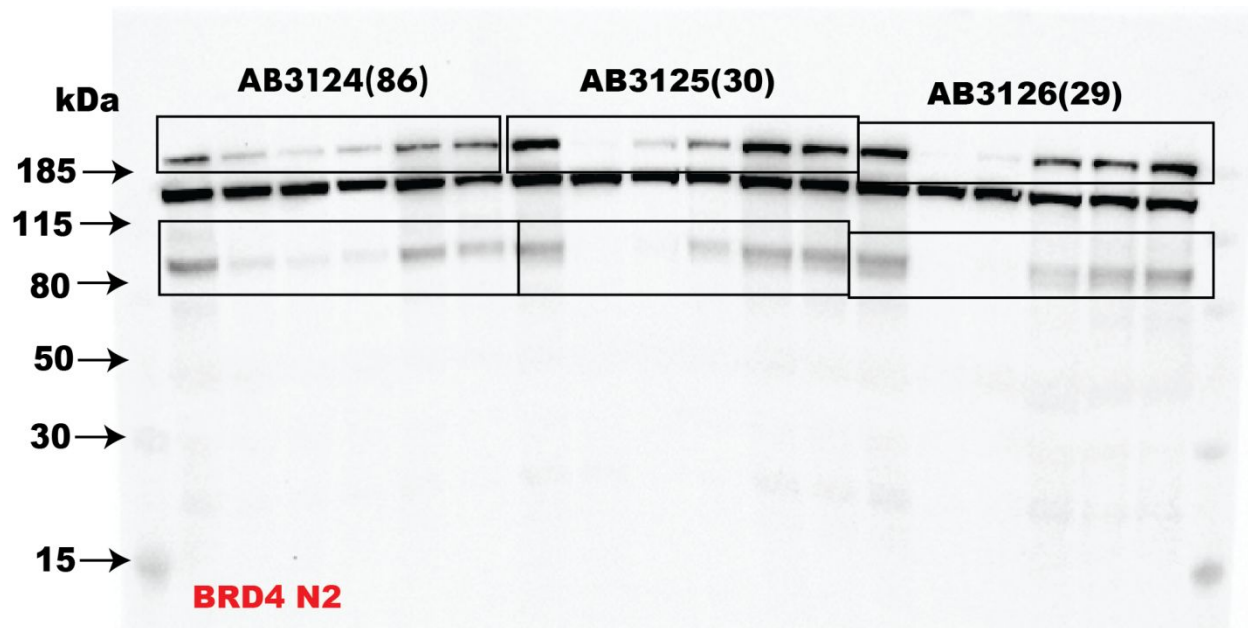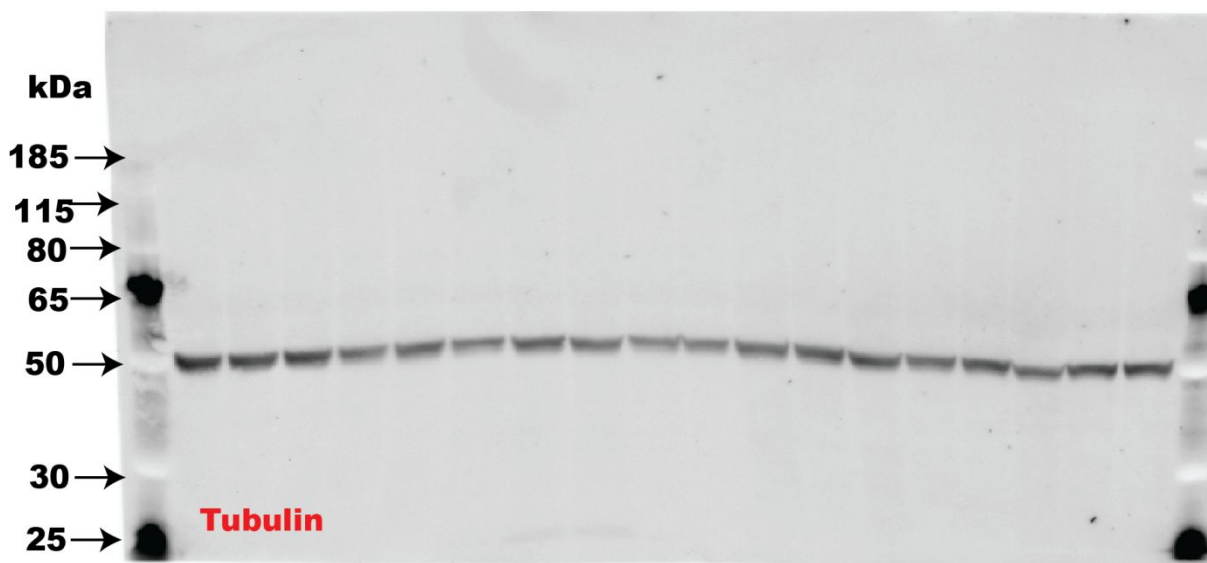



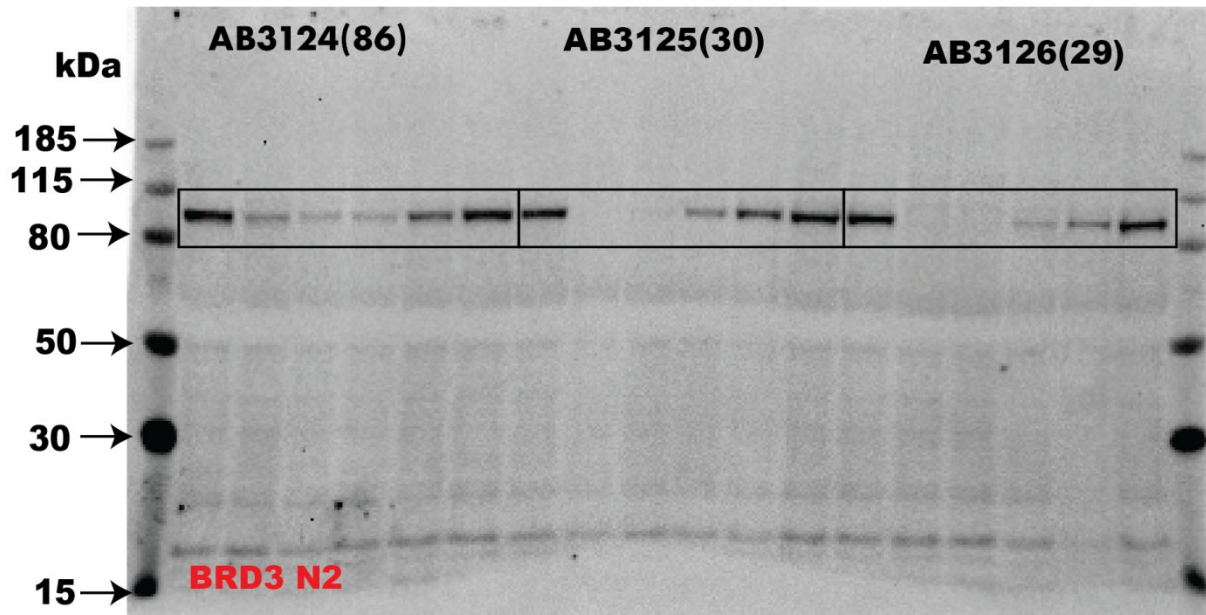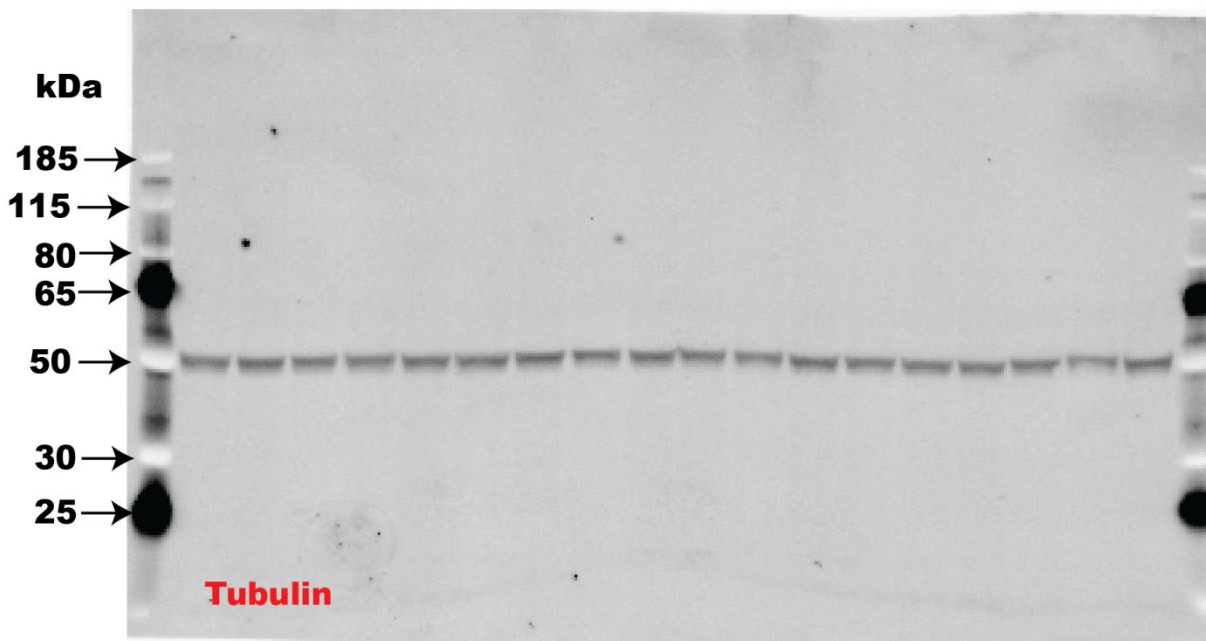

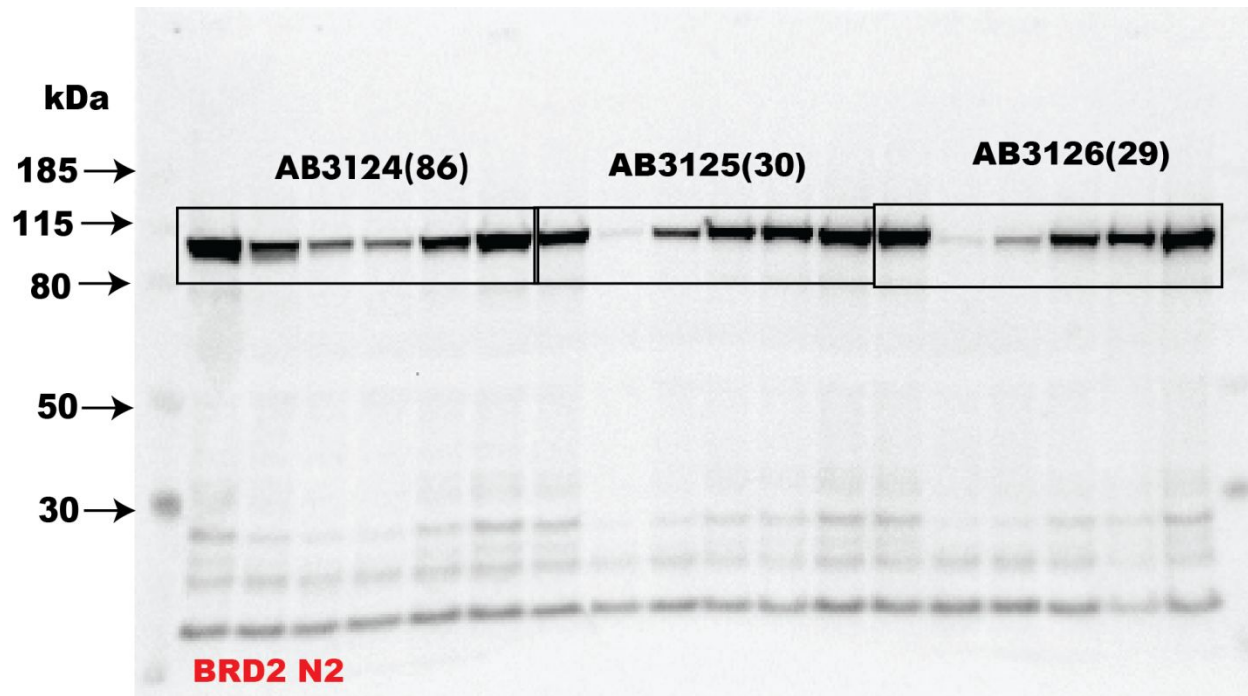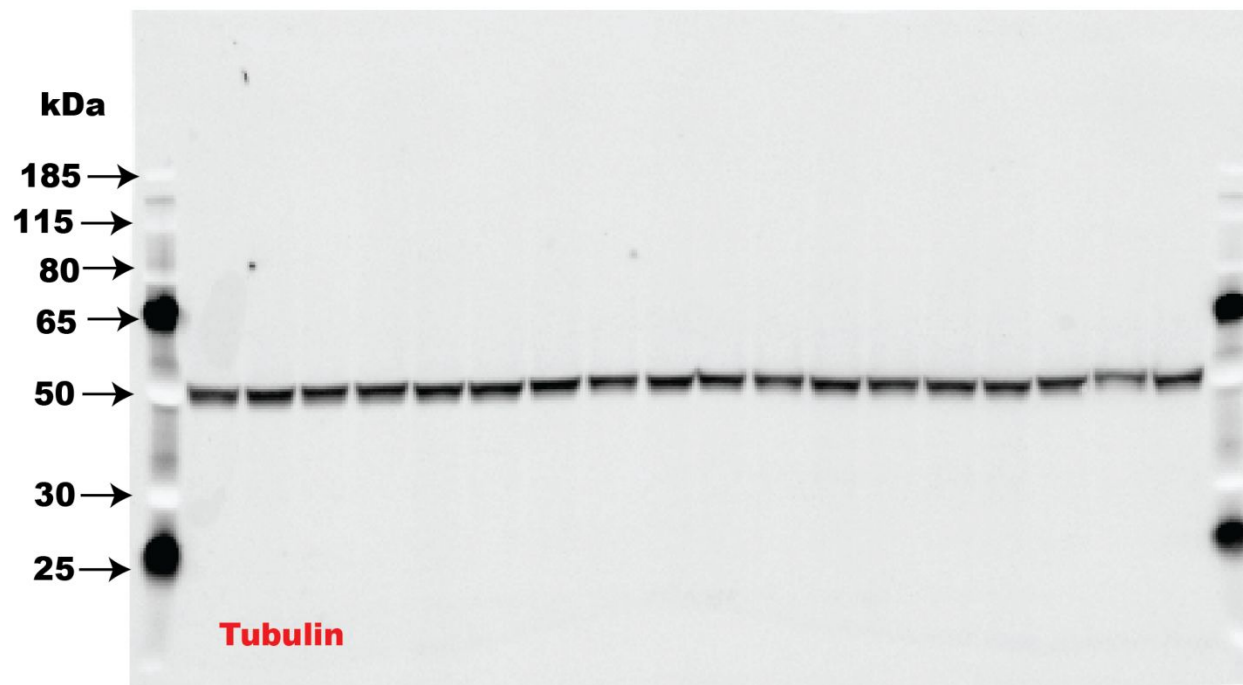



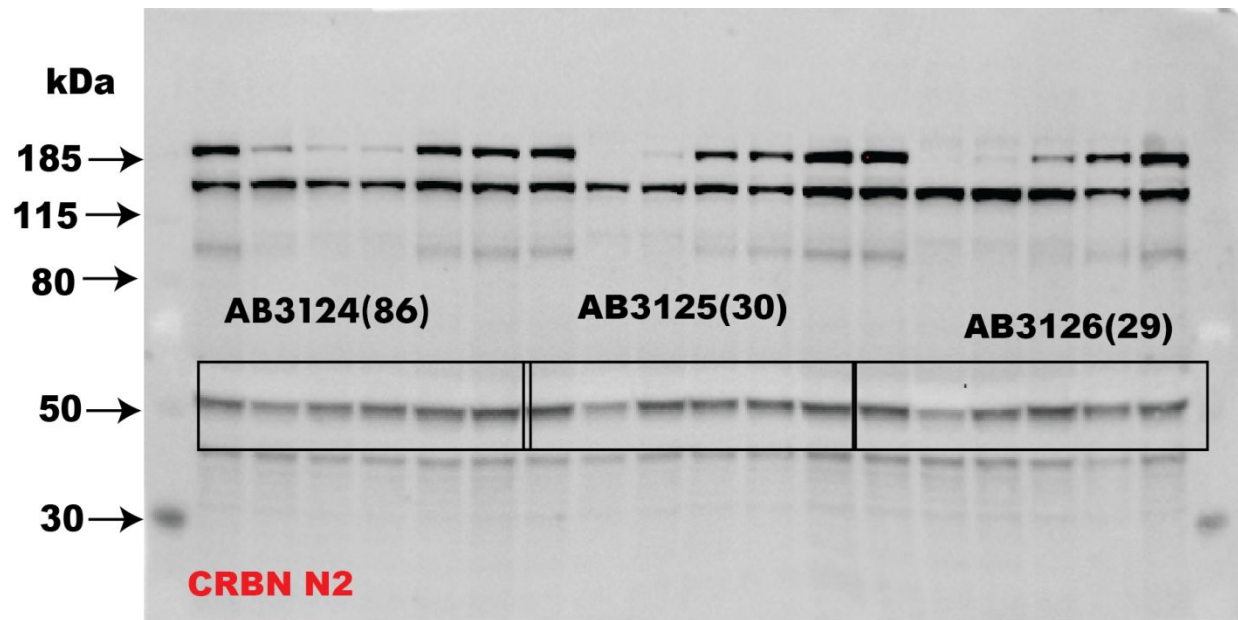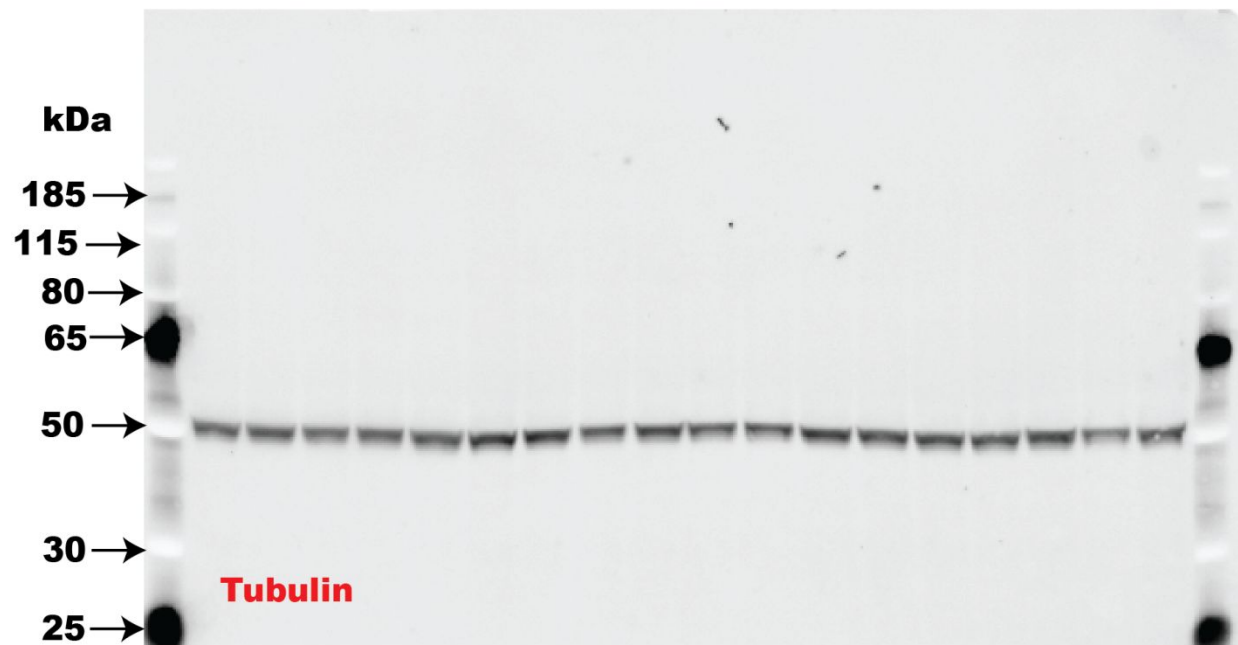

Supplementary Figure 10 (related to Figure 12). Uncropped independent replicate western blotting images of the evaluation of heterotrivalent AB3145 (97) & AGB1 in homozygous BromoTag-BRD4 HEK293 cells.

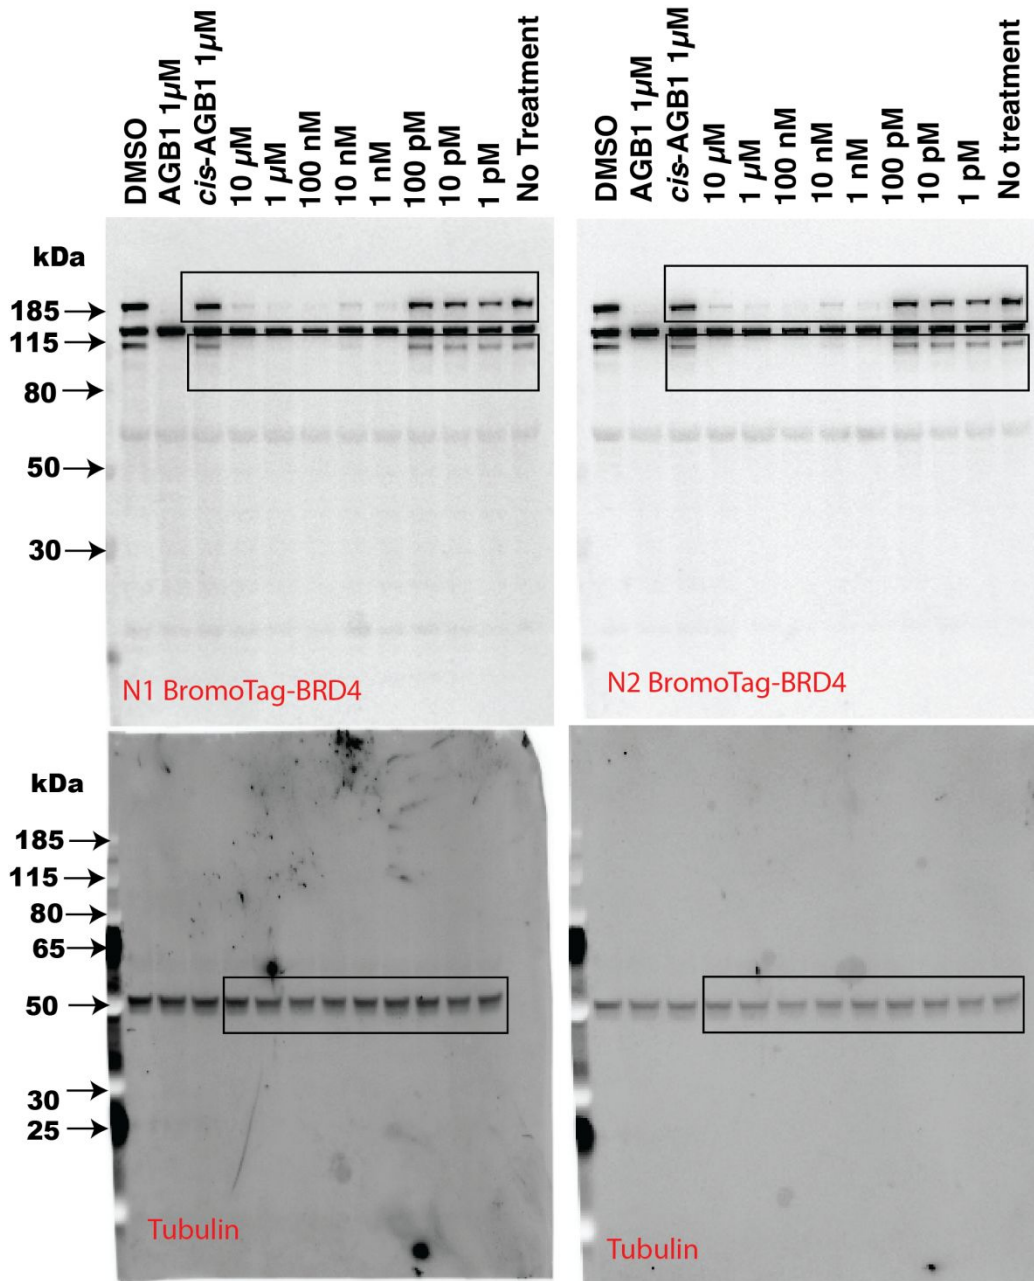

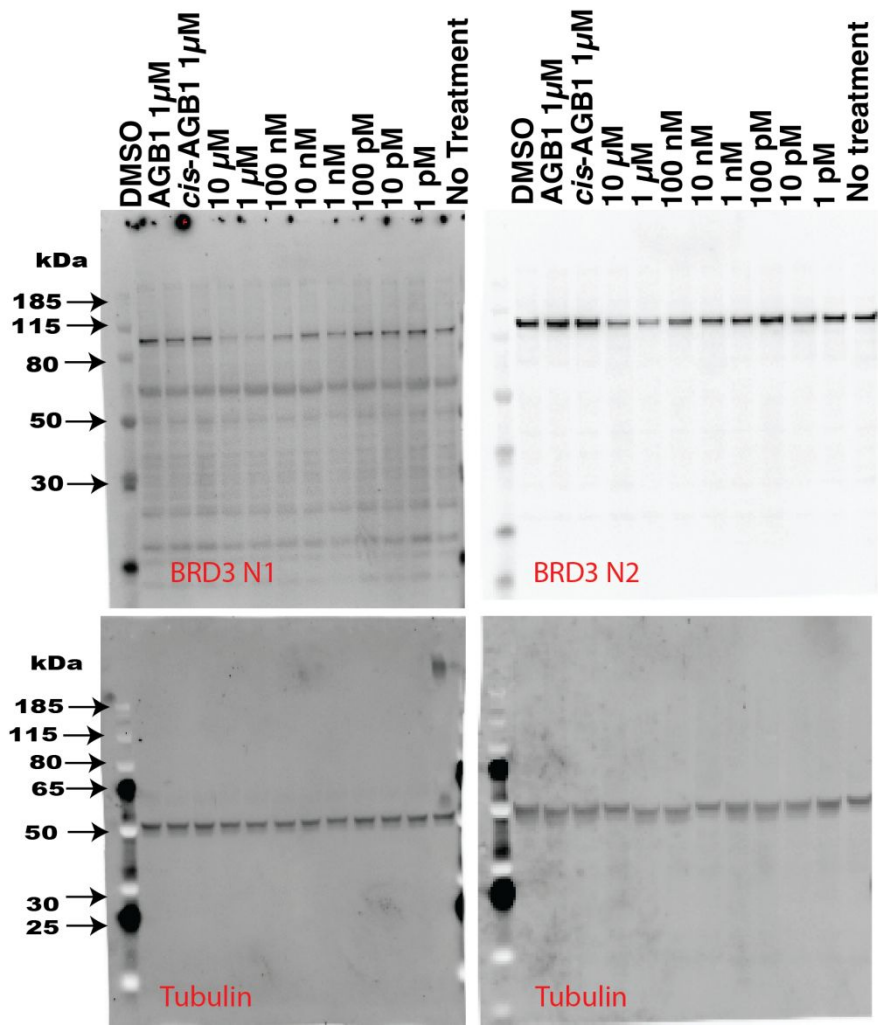

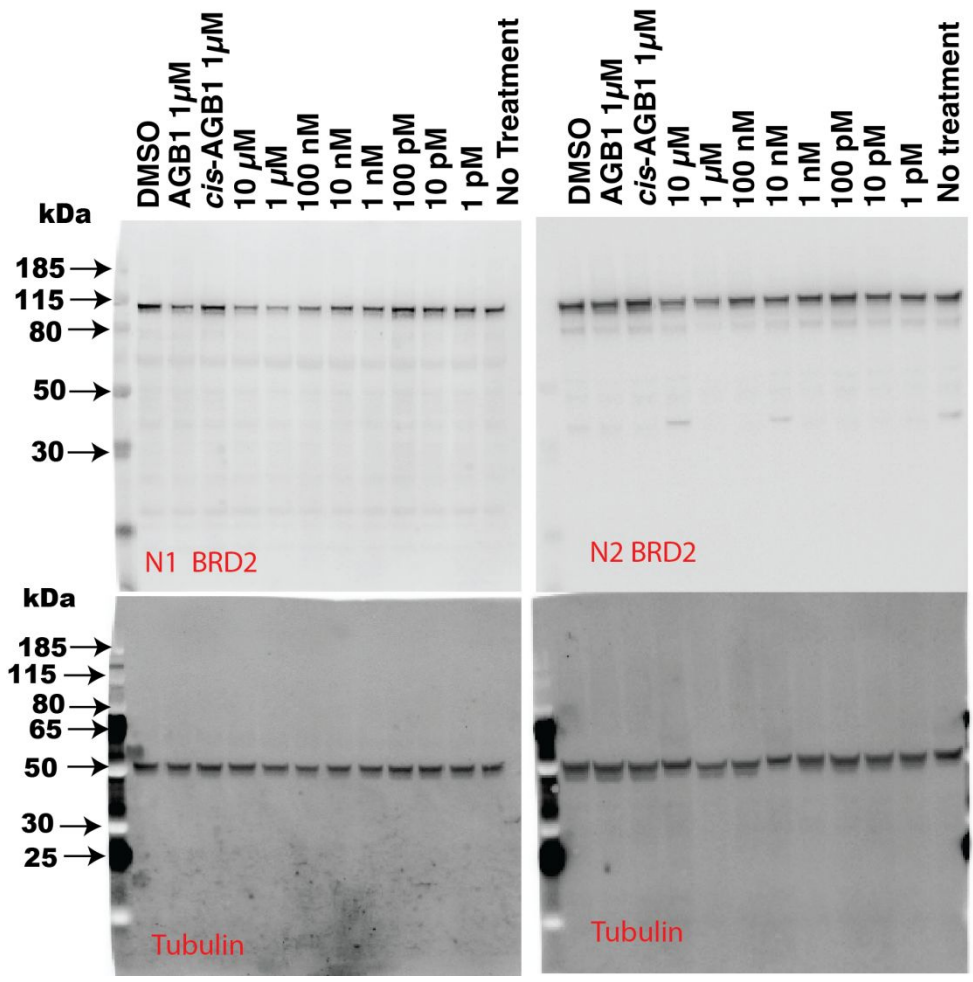

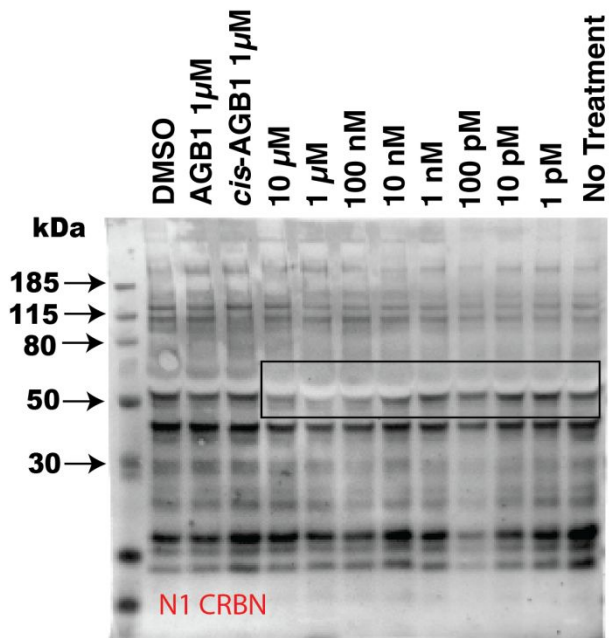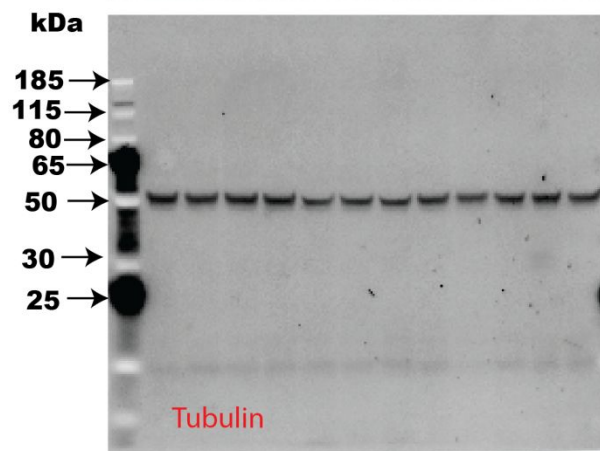

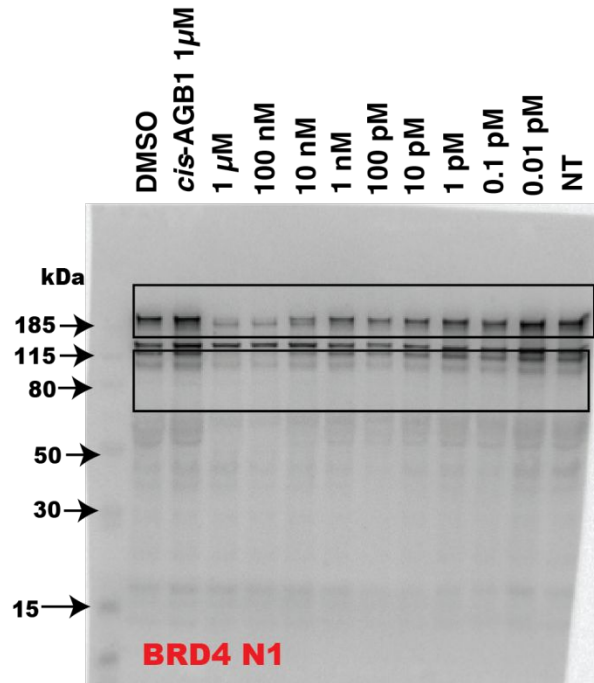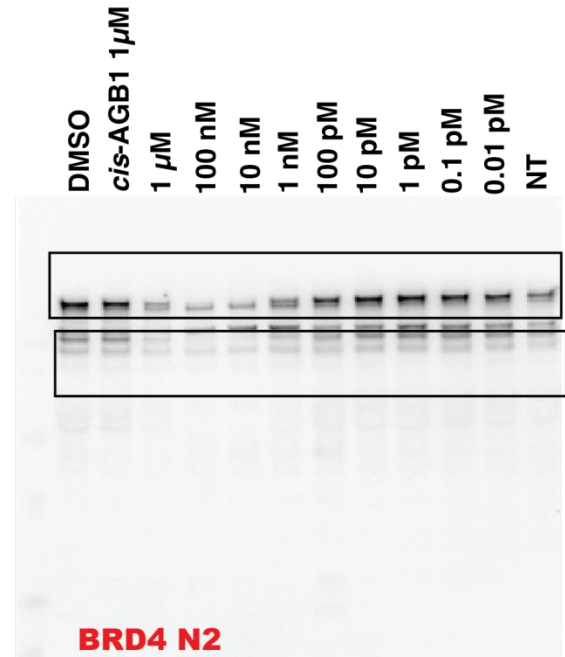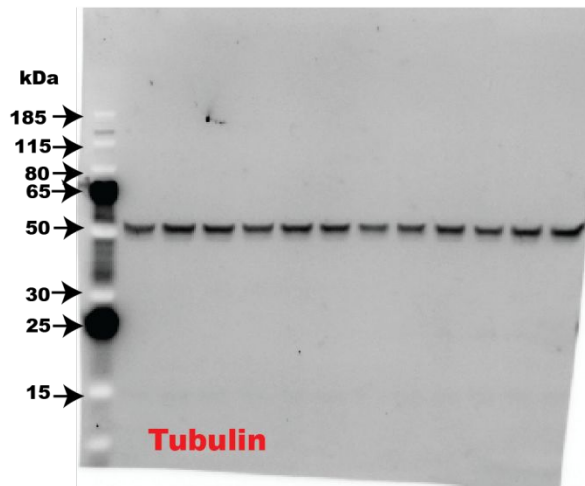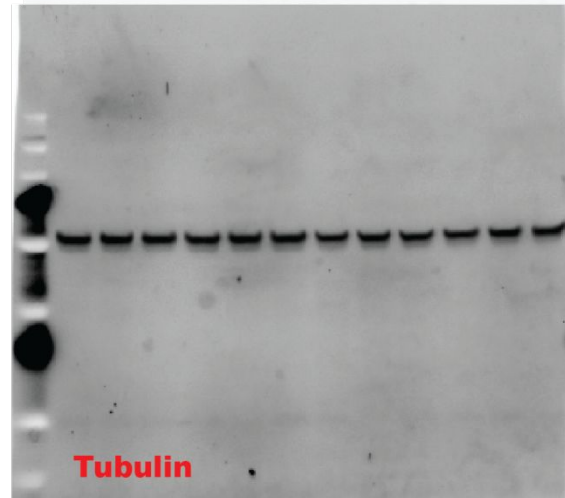



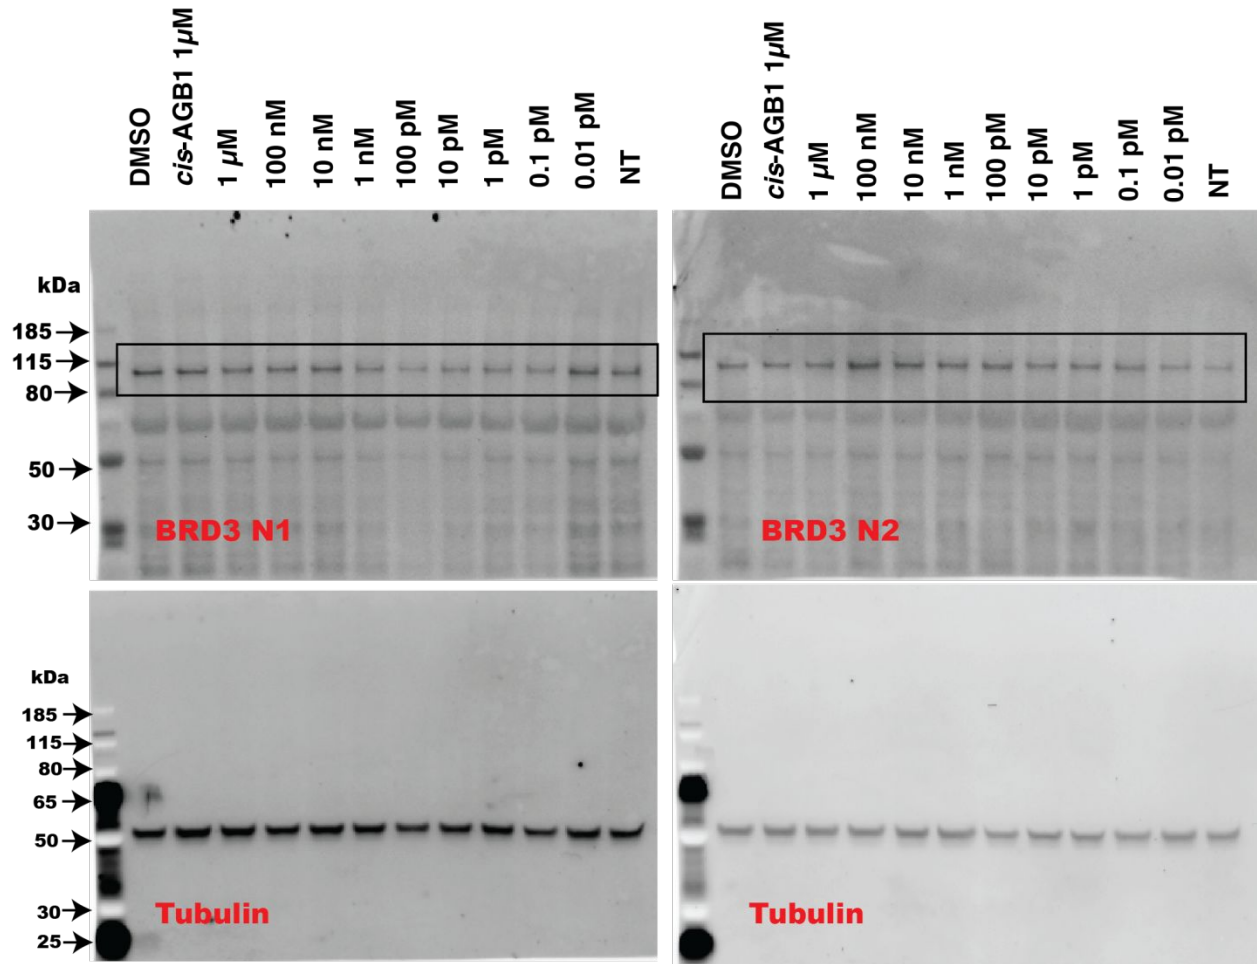

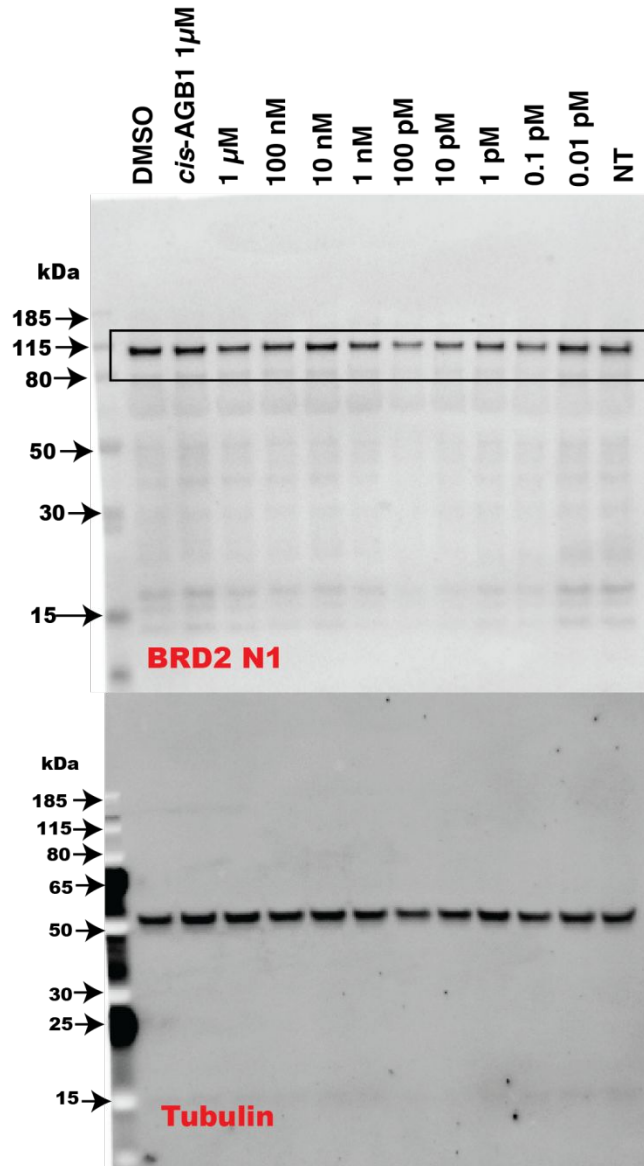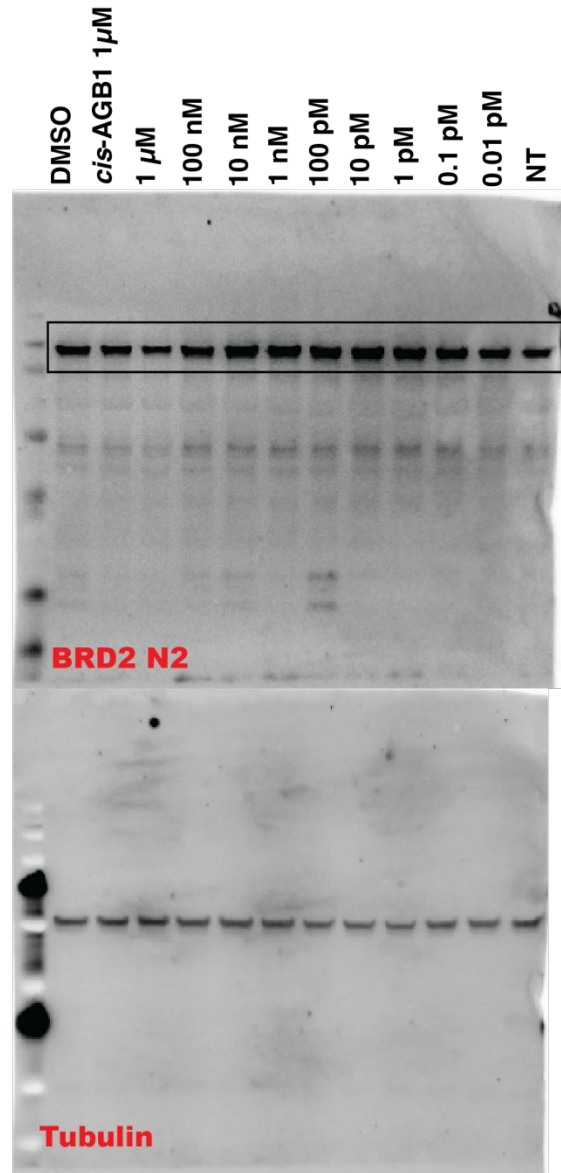

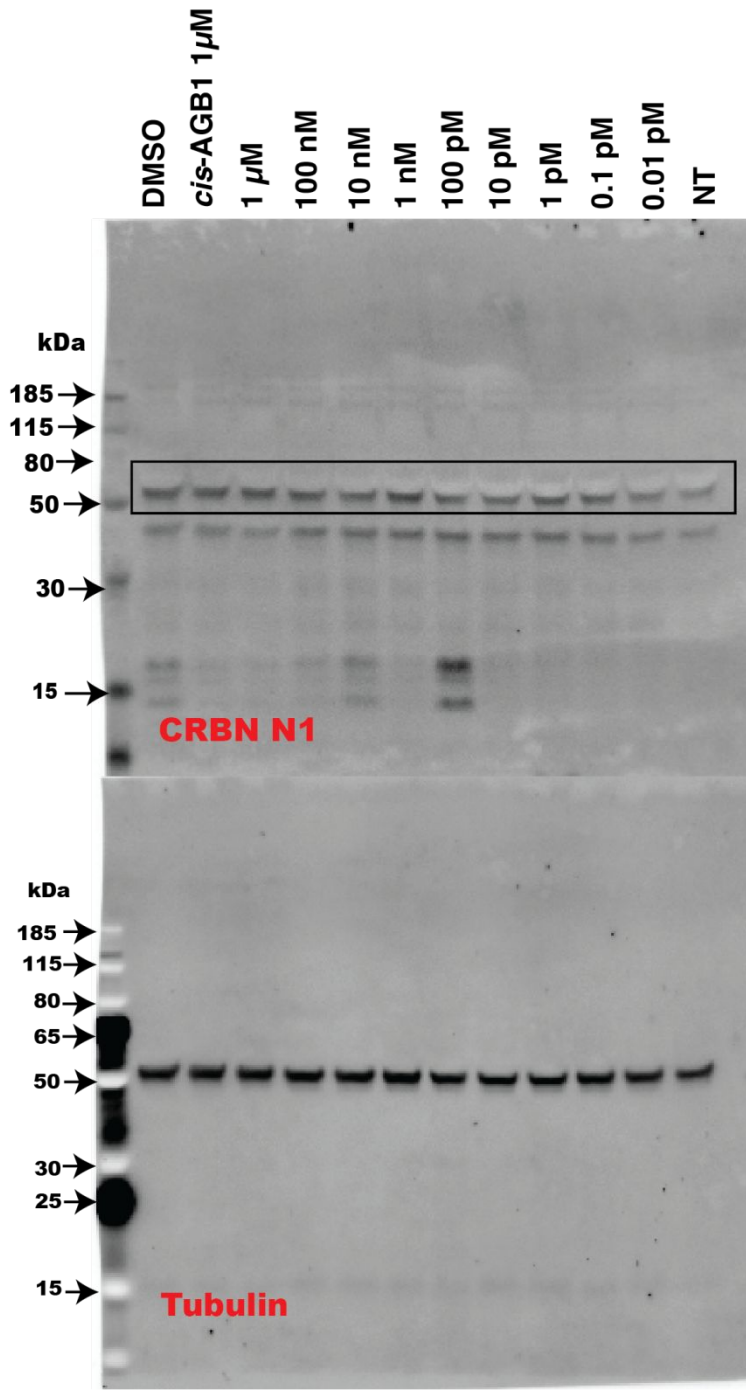

Supplementary Figure 11 (related to Figure 12). Cropped western blotting images of the evaluation of heterotrivalent AB3145 (97) and AGB1 in homozygous BromoTag-BRD4 HEK293 cells.

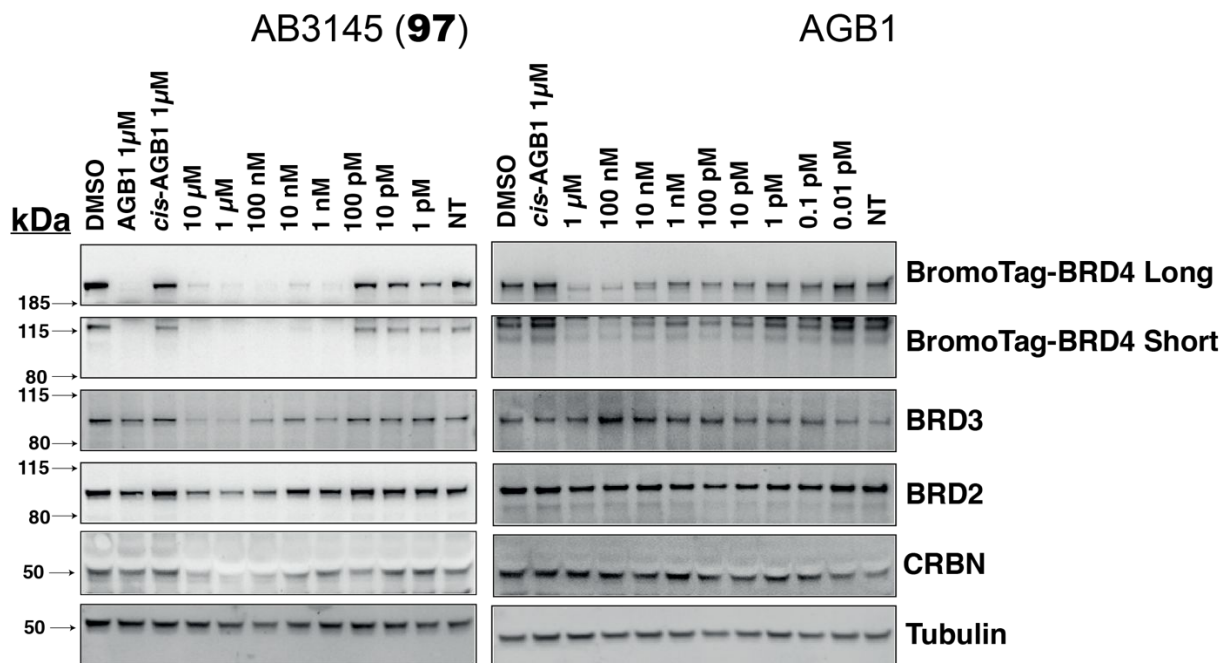

Supplementary Table 8 (related to Figure 12). DC<sub>50</sub> values of AB3145 (97) and AGB1 in homozygous BromoTag-BRD4 HEK293 cells.

| Protein               | AB3145 (97)       |                    | AGB1              |                    |
|-----------------------|-------------------|--------------------|-------------------|--------------------|
|                       | pDC <sub>50</sub> | D <sub>max</sub> % | pDC <sub>50</sub> | D <sub>max</sub> % |
| BRD4 <sup>Long</sup>  | 9.9 ± 0.6         | 14                 | 8.0 ± 0.2         | 4                  |
| BRD4 <sup>Short</sup> | 9.9 ± 0.1         | 14                 | 8.6 ± 0.1         | 11                 |
| BRD3                  | 7.5 ± 0.4         | 21                 | N.A.              | N.A.               |
| BRD2                  | 6.5 <sup>a</sup>  | 56                 | N.A.              | N.A.               |
| CRBN                  | 7.7 <sup>b</sup>  | 23                 | N.A.              | N.A.               |

<sup>a</sup> Unable to produce a meaningful S.E. due to an incomplete curve for one independent repeat. <sup>b</sup> S.E. unavailable due to N=1 repeat.

# HPLC/HRMS Traces for Compounds 1, 2, 23 – 32, 86, 93 – 95 and 97.

## MN666 (1)

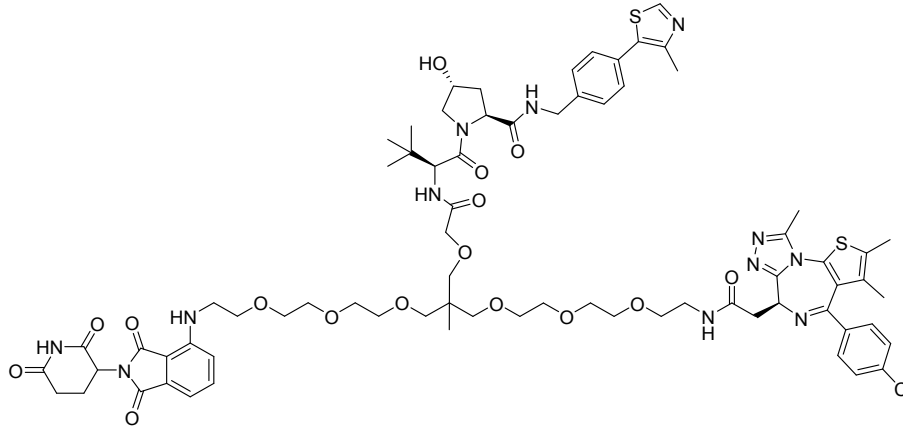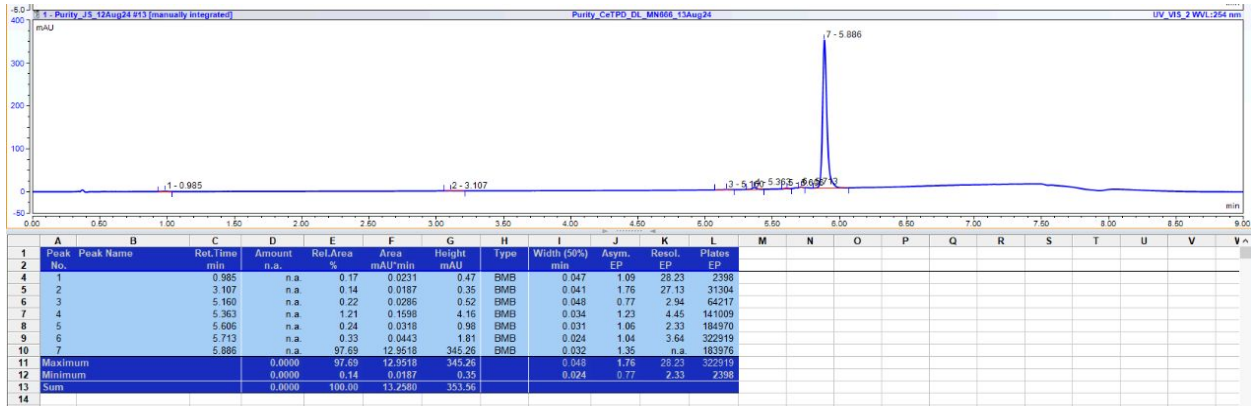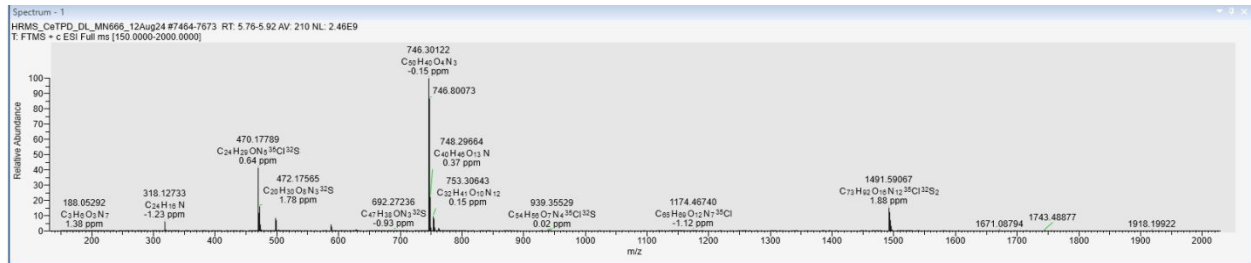

MN675 (2)

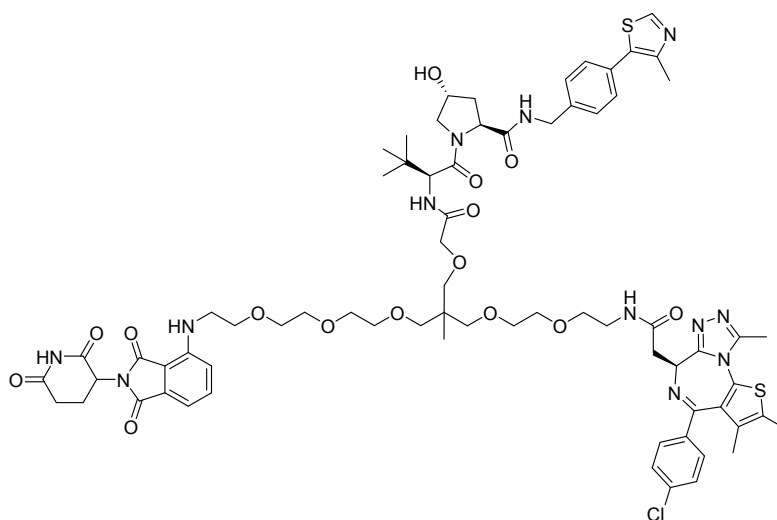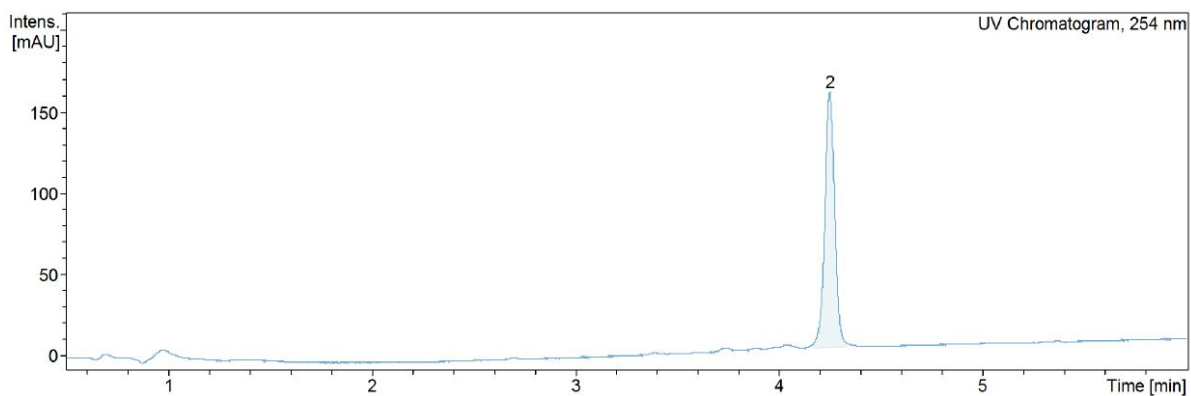

| # | RT [min] | Area Frac. % | Chromatogram                              |
|---|----------|--------------|-------------------------------------------|
| 1 | 4.1      | 9.80         | BPC 149.0000-3000.0000 +, Masses excluded |
| 2 | 4.2      | 100.00       | UV Chromatogram, 254 nm                   |
| 3 | 4.3      | 90.20        | BPC 149.0000-3000.0000 +, Masses excluded |

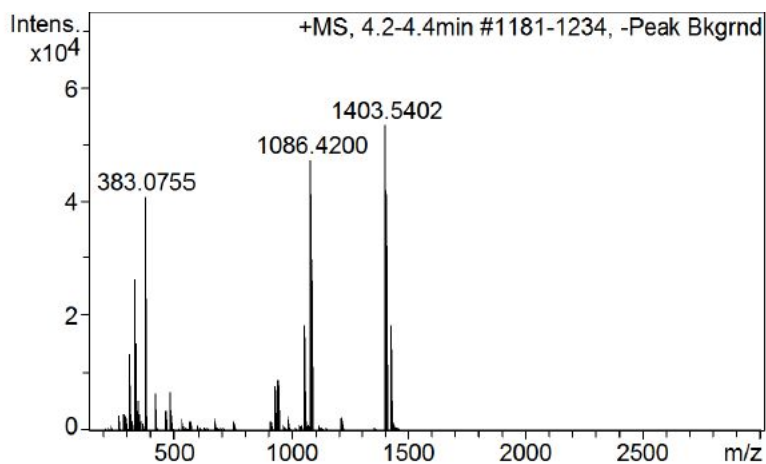







AB3064 (25)

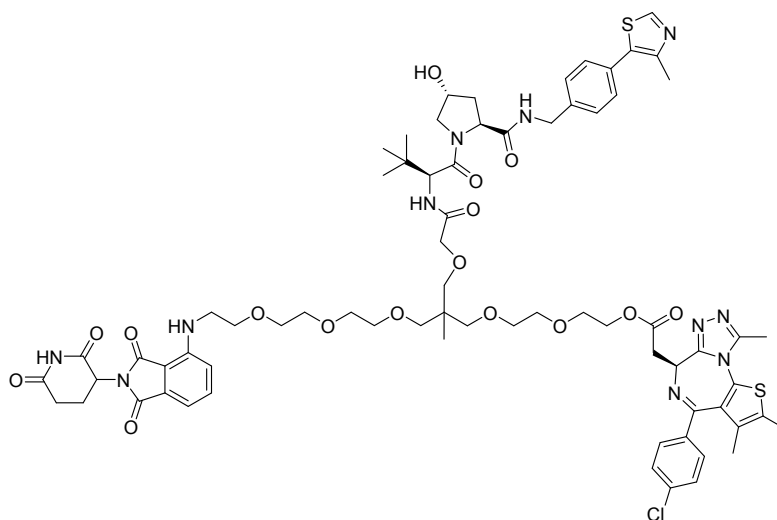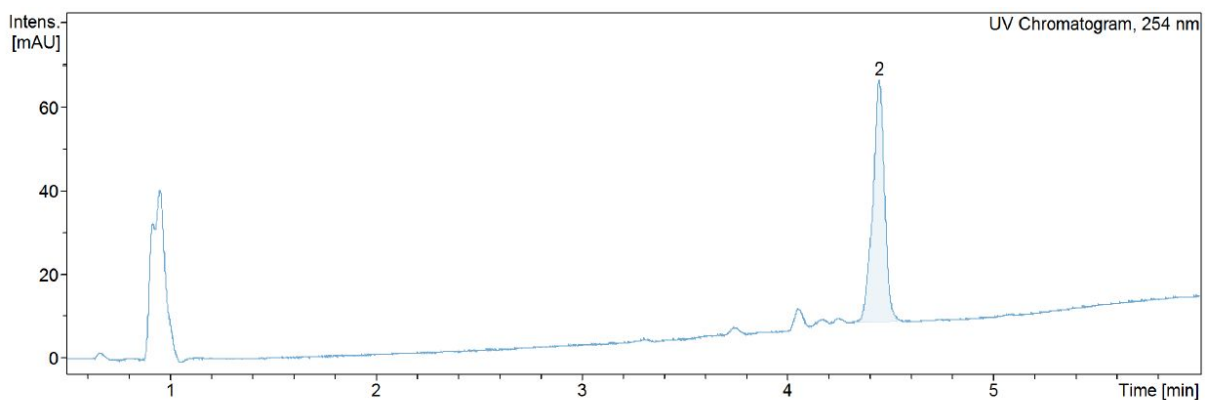

| # | RT [min] | Area Frac. % | Chromatogram                              |
|---|----------|--------------|-------------------------------------------|
| 1 | 4.1      | 27.74        | BPC 149.0000-3001.0000 +, Masses excluded |
| 2 | 4.4      | 100.00       | UV Chromatogram, 254 nm                   |
| 3 | 4.5      | 72.26        | BPC 149.0000-3001.0000 +, Masses excluded |

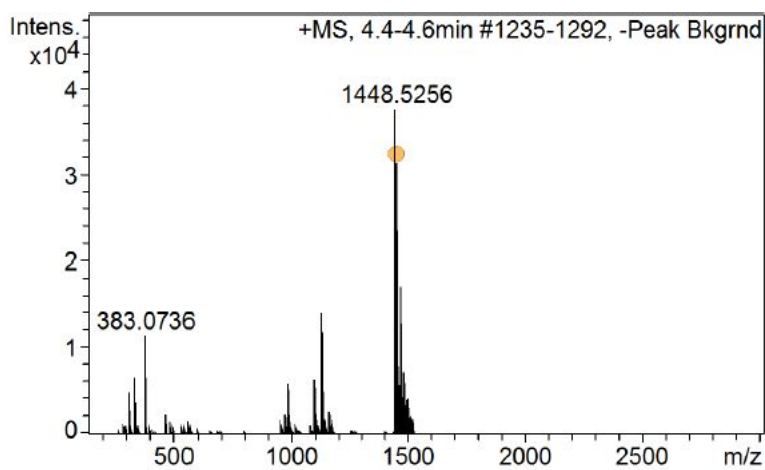

AB3063 (26)

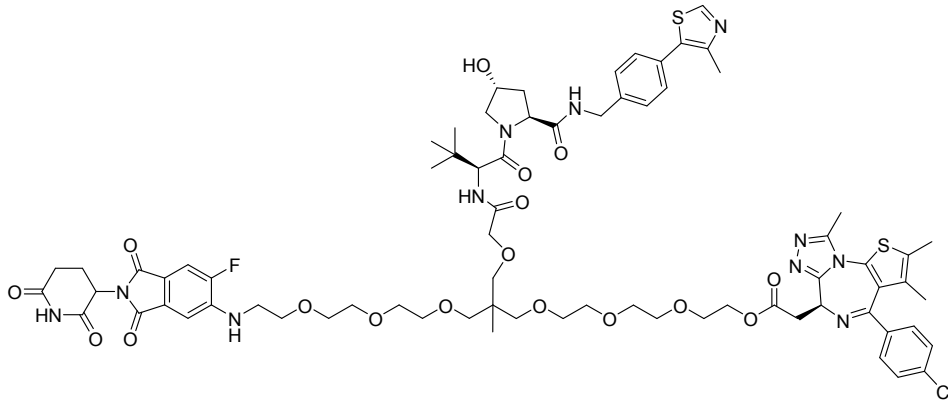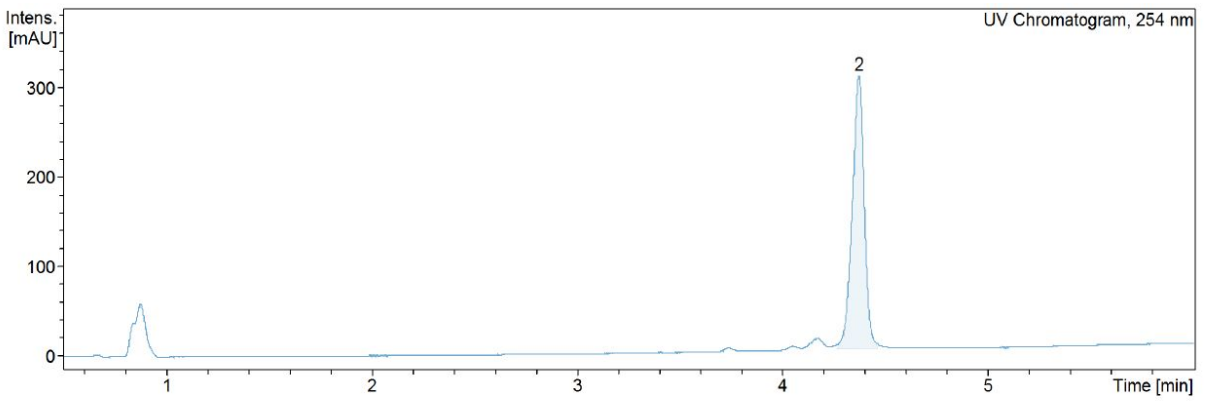

| # | RT [min] | Area Frac. % | Chromatogram                              |
|---|----------|--------------|-------------------------------------------|
| 1 | 4.1      | 10.77        | BPC 149.0000-3001.0000 +, Masses excluded |
| 2 | 4.4      | 100.00       | UV Chromatogram, 254 nm                   |
| 3 | 4.4      | 89.23        | BPC 149.0000-3001.0000 +, Masses excluded |

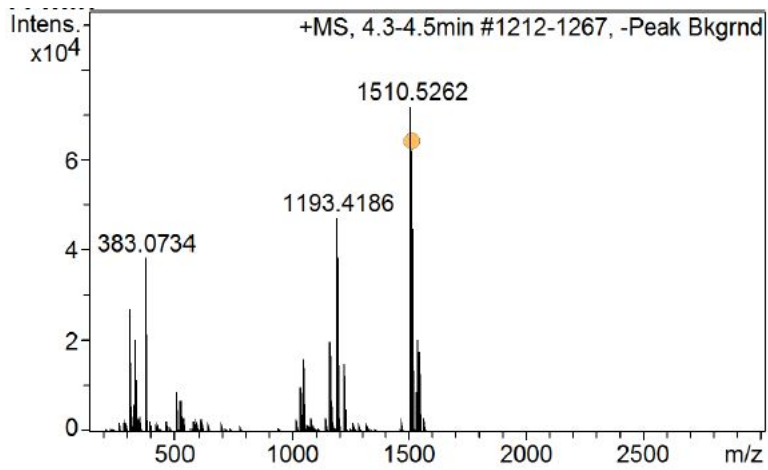

AB3067 (27)

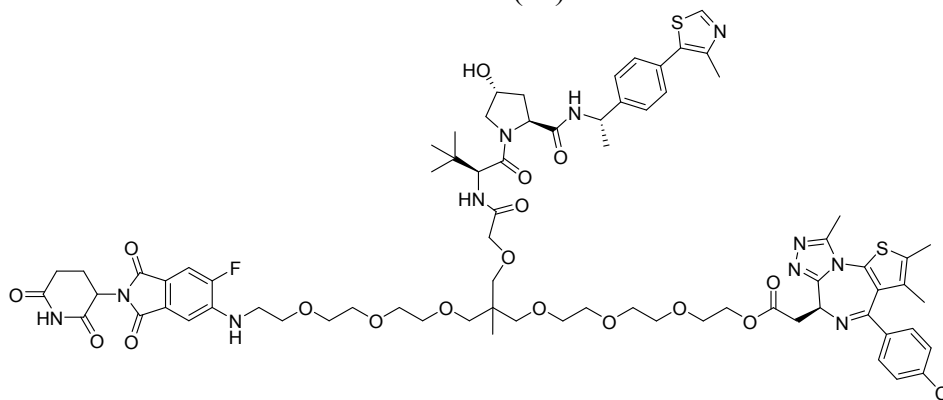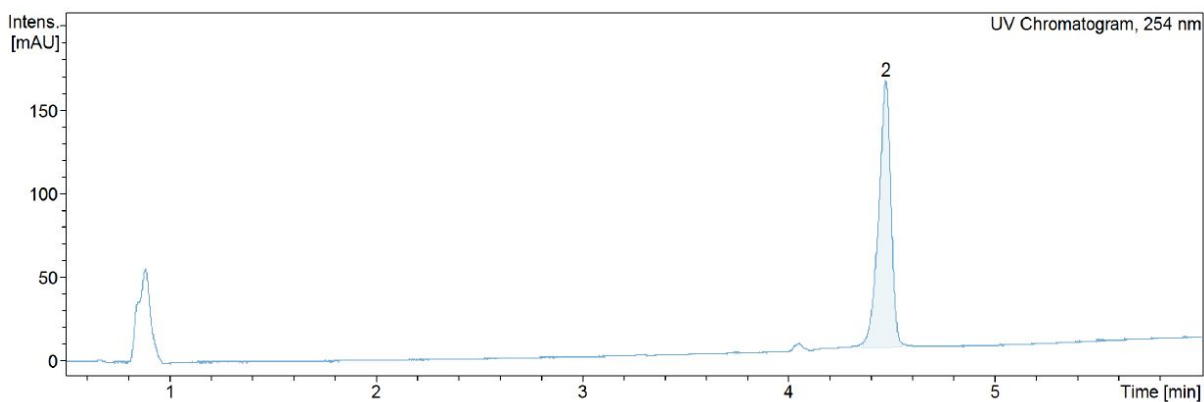

| # | RT [min] | Area Frac. % | Chromatogram                              |
|---|----------|--------------|-------------------------------------------|
| 1 | 4.1      | 16.07        | BPC 149.0000-3001.0000 +, Masses excluded |
| 2 | 4.5      | 100.00       | UV Chromatogram, 254 nm                   |
| 3 | 4.5      | 83.93        | BPC 149.0000-3001.0000 +, Masses excluded |

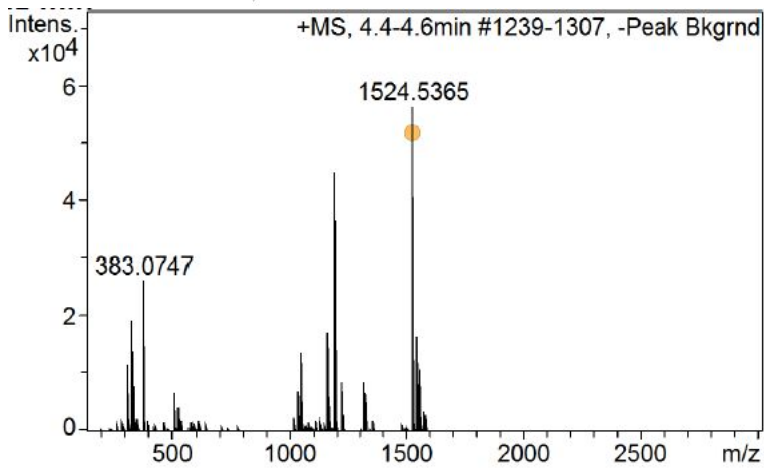

AB3065 (28)

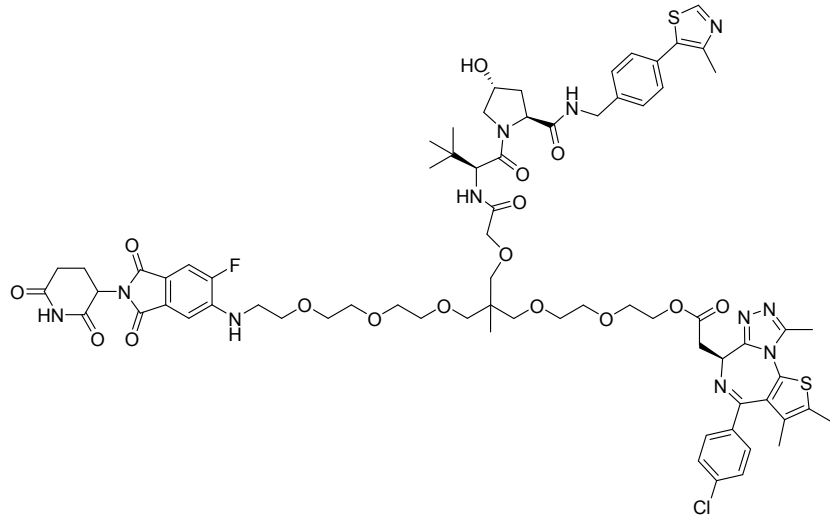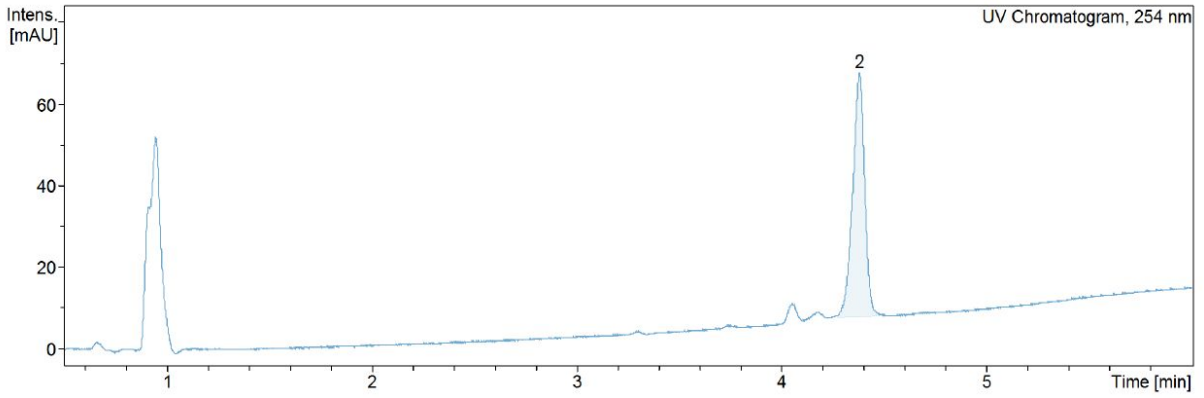

| # | RT [min] | Area Frac. % | Chromatogram                              |
|---|----------|--------------|-------------------------------------------|
| 1 | 4.1      | 29.94        | BPC 149.0000-3001.0000 +, Masses excluded |
| 2 | 4.4      | 100.00       | UV Chromatogram, 254 nm                   |
| 3 | 4.4      | 70.06        | BPC 149.0000-3001.0000 +, Masses excluded |

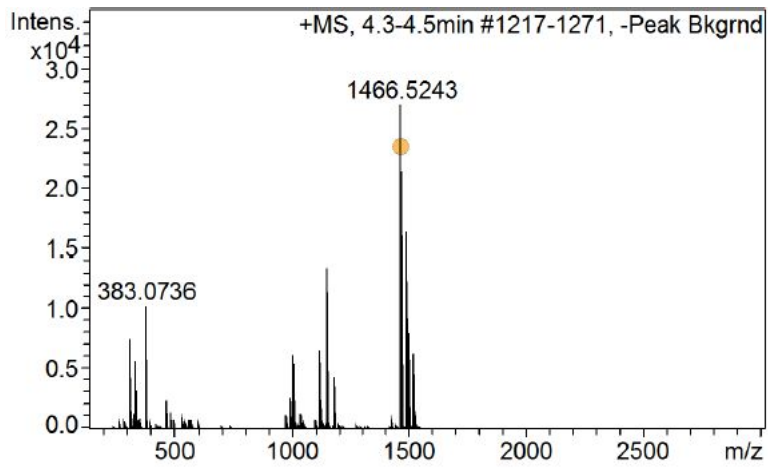



# AB3126 (29)

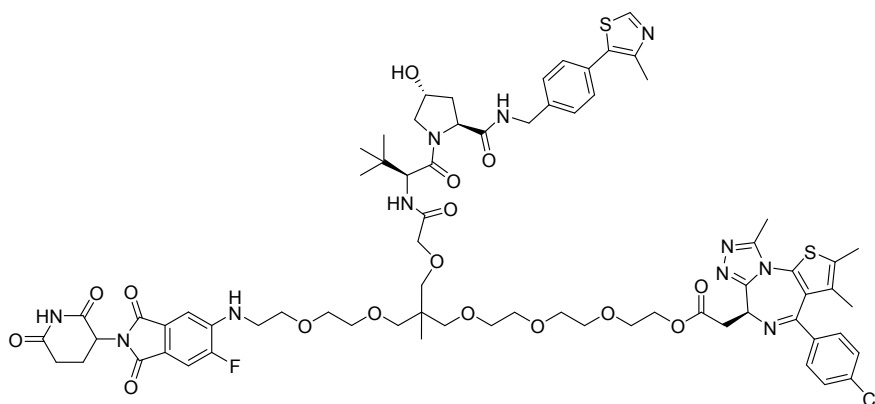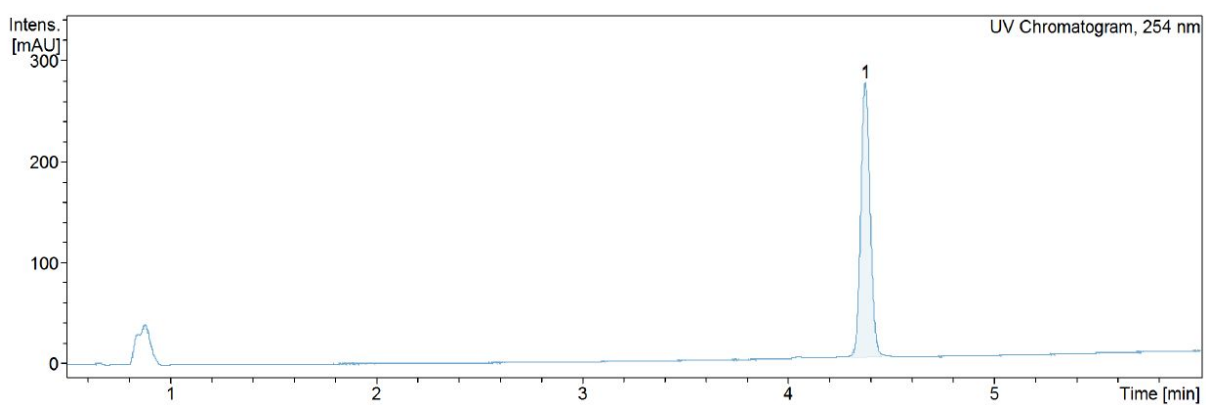

| # | RT [min] | Area Frac. % | Chromatogram                              |
|---|----------|--------------|-------------------------------------------|
| 1 | 4.4      | 100.00       | UV Chromatogram, 254 nm                   |
| 2 | 4.4      | 100.00       | BPC 150.0000-3001.0000 +, Masses excluded |

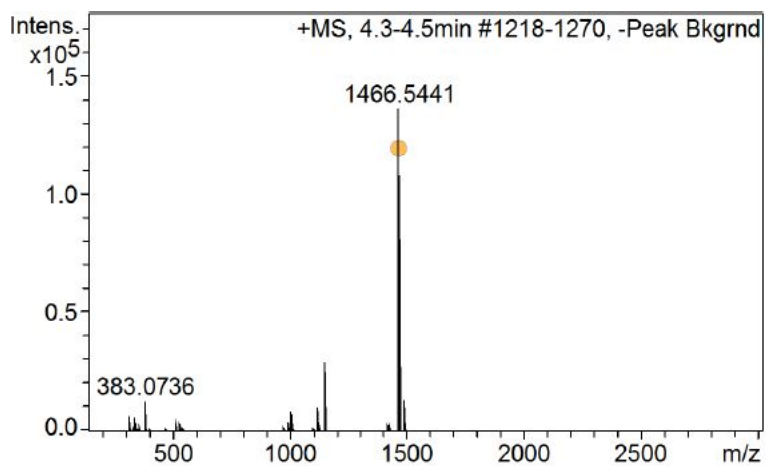





AB3030 (32)

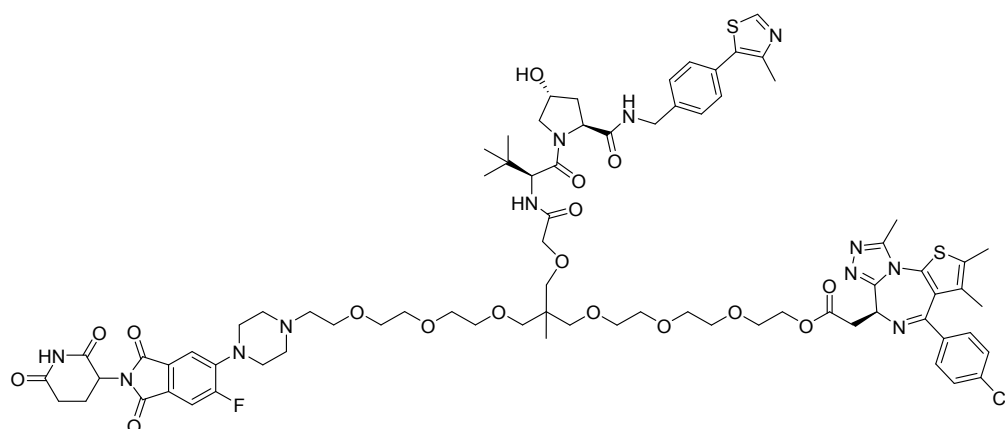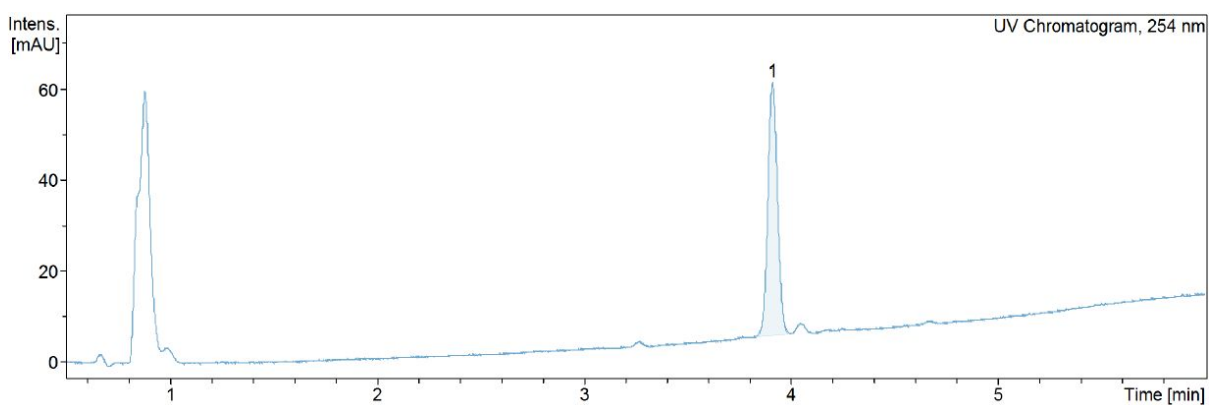

| # | RT [min] | Area Frac. % | Chromatogram            |
|---|----------|--------------|-------------------------|
| 1 | 3.9      | 100.00       | UV Chromatogram, 254 nm |

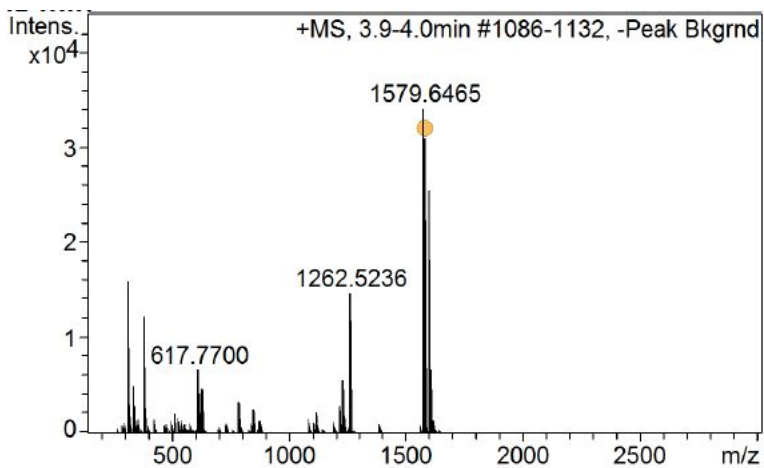

AB3124 (86)

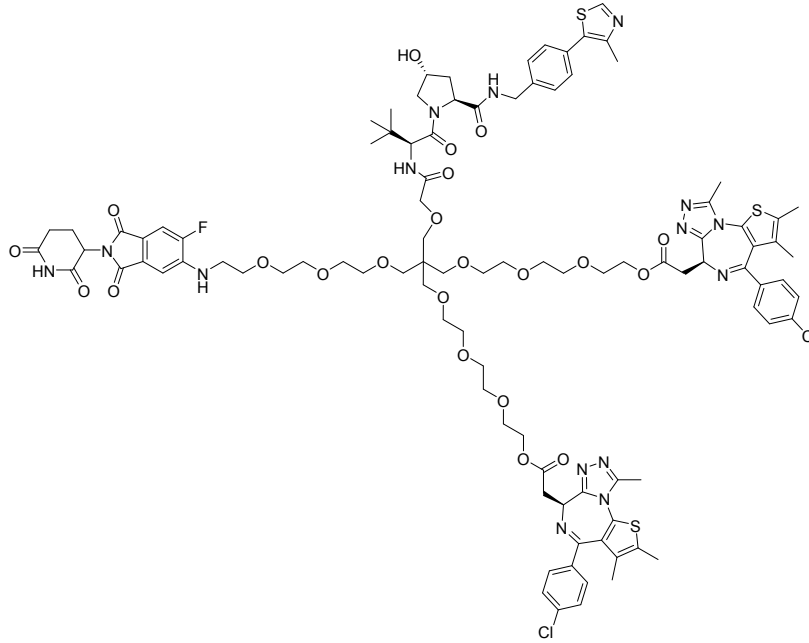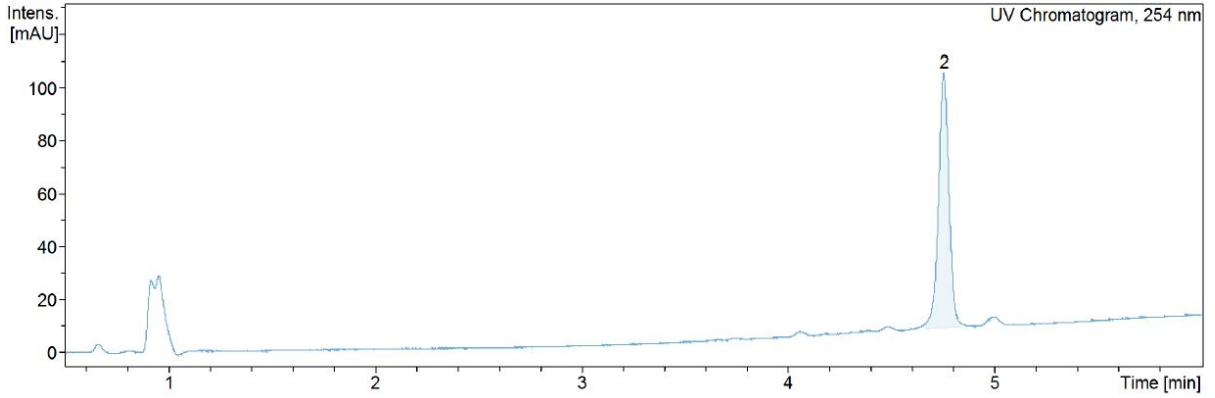

| # | RT [min] | Area Frac. % | Chromatogram                              |
|---|----------|--------------|-------------------------------------------|
| 1 | 4.1      | 17.02        | BPC 150.0000-3001.0000 +, Masses excluded |
| 2 | 4.8      | 100.00       | UV Chromatogram, 254 nm                   |
| 3 | 4.8      | 82.98        | BPC 150.0000-3001.0000 +, Masses excluded |

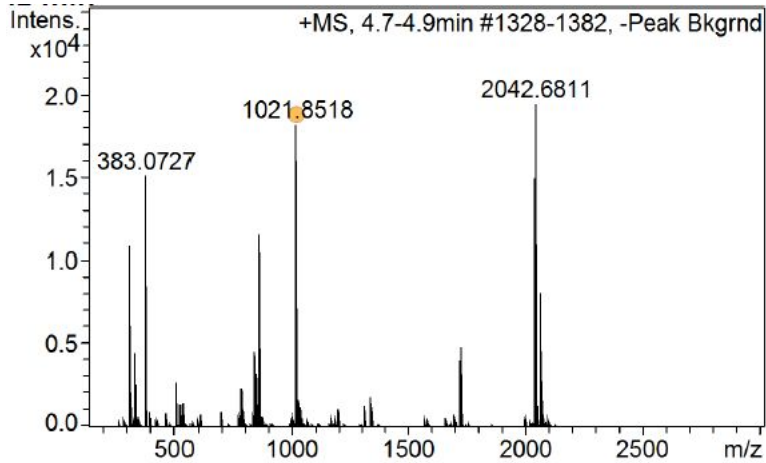

*neg*-AB3067 (**93**)

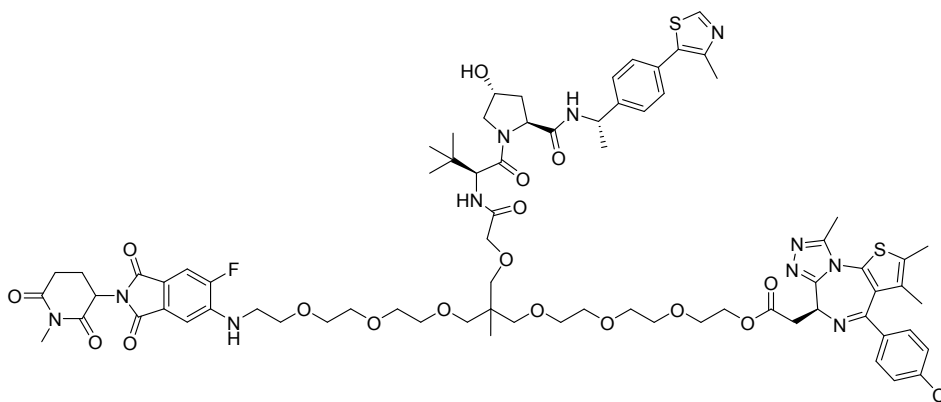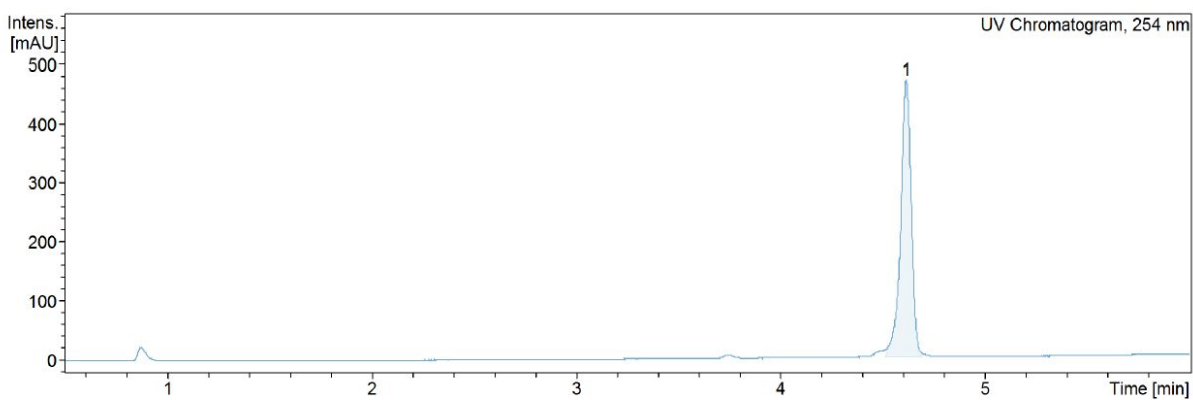

| # | RT [min] | Area Frac. % | Chromatogram            |
|---|----------|--------------|-------------------------|
| 1 | 4.6      | 100.00       | UV Chromatogram, 254 nm |

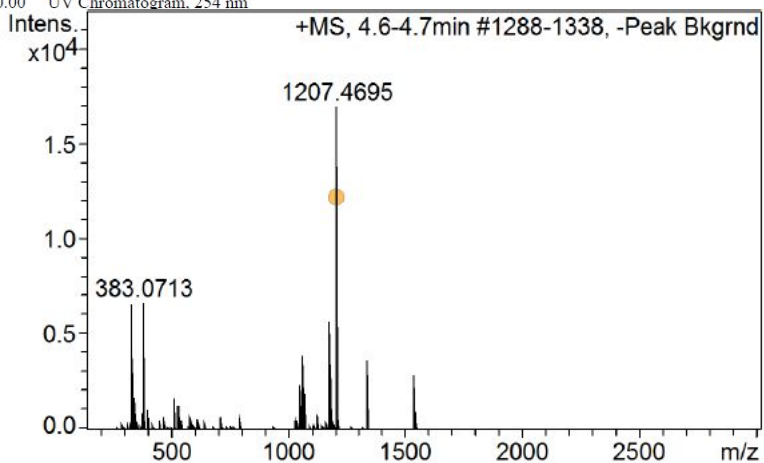

Supplement: ja4c11556_si_001.pdf [file ja4c11556_si_001.pdf]
